# Supplementary material for: A Systematic Review with a Meta-Analysis of the Motivational Climate and Hedonic Well-Being Constructs: The Importance of the Athlete Level
Source: MDPI journal article supplement (doi:10.3390/ejihpe14040064), 2024-04-09
Supplement: s1 [file s1]

## **Supplemental Tables and Figures**

Contents:

- **Supplemental Table 1.** PRISMA checklist.
- **Supplemental Table 2.** Reviewed study references.
- **Supplement Table 3.** Correlates entered for each study.
- **Supplement Figures.** Remove-one study figures.
- **Supplement Figures.** Cumulative analysis by year figures.

**Supplemental Table 1.** PRISMA checklist.

| Section and Topic             | Item # | Checklist item                                                                                                                                                                                                                                                                                       | Location where item is reported |
|-------------------------------|--------|------------------------------------------------------------------------------------------------------------------------------------------------------------------------------------------------------------------------------------------------------------------------------------------------------|---------------------------------|
| <b>TITLE</b>                  |        |                                                                                                                                                                                                                                                                                                      |                                 |
| Title                         | 1      | Identify the report as a systematic review.                                                                                                                                                                                                                                                          | Title                           |
| <b>ABSTRACT</b>               |        |                                                                                                                                                                                                                                                                                                      |                                 |
| Abstract                      | 2      | See the PRISMA 2020 for Abstracts checklist.                                                                                                                                                                                                                                                         | Yes, within word limits.        |
| <b>INTRODUCTION</b>           |        |                                                                                                                                                                                                                                                                                                      |                                 |
| Rationale                     | 3      | Describe the rationale for the review in the context of existing knowledge.                                                                                                                                                                                                                          | Introduction                    |
| Objectives                    | 4      | Provide an explicit statement of the objective(s) or question(s) the review addresses.                                                                                                                                                                                                               | 1.1.                            |
| <b>METHODS</b>                |        |                                                                                                                                                                                                                                                                                                      |                                 |
| Eligibility criteria          | 5      | Specify the inclusion and exclusion criteria for the review and how studies were grouped for the syntheses.                                                                                                                                                                                          | 2.1.                            |
| Information sources           | 6      | Specify all databases, registers, websites, organisations, reference lists and other sources searched or consulted to identify studies. Specify the date when each source was last searched or consulted.                                                                                            | 2.2.                            |
| Search strategy               | 7      | Present the full search strategies for all databases, registers and websites, including any filters and limits used.                                                                                                                                                                                 | 2.2., supplement table, fig.1   |
| Selection process             | 8      | Specify the methods used to decide whether a study met the inclusion criteria of the review, including how many reviewers screened each record and each report retrieved, whether they worked independently, and if applicable, details of automation tools used in the process.                     | 2.1.                            |
| Data collection process       | 9      | Specify the methods used to collect data from reports, including how many reviewers collected data from each report, whether they worked independently, any processes for obtaining or confirming data from study investigators, and if applicable, details of automation tools used in the process. | 2.3.                            |
| Data items                    | 10a    | List and define all outcomes for which data were sought. Specify whether all results that were compatible with each outcome domain in each study were sought (e.g. for all measures, time points, analyses), and if not, the methods used to decide which results to collect.                        | 2.3.                            |
|                               | 10b    | List and define all other variables for which data were sought (e.g. participant and intervention characteristics, funding sources). Describe any assumptions made about any missing or unclear information.                                                                                         | 2.3.                            |
| Study risk of bias assessment | 11     | Specify the methods used to assess risk of bias in the included studies, including details of the tool(s) used, how many reviewers assessed each study and whether they worked independently, and if applicable, details of automation tools used in the process.                                    | 2.4.                            |
| Effect measures               | 12     | Specify for each outcome the effect measure(s) (e.g. risk ratio, mean difference) used in the synthesis or presentation of results.                                                                                                                                                                  | 2.5.                            |
| Synthesis                     | 13a    | Describe the processes used to decide which studies were eligible for each synthesis (e.g. tabulating the study                                                                                                                                                                                      | 2.5.                            |

| Section and Topic             | Item # | Checklist item                                                                                                                                                                                                                                                                       | Location where item is reported |
|-------------------------------|--------|--------------------------------------------------------------------------------------------------------------------------------------------------------------------------------------------------------------------------------------------------------------------------------------|---------------------------------|
| methods                       |        | intervention characteristics and comparing against the planned groups for each synthesis (item #5)).                                                                                                                                                                                 |                                 |
|                               | 13b    | Describe any methods required to prepare the data for presentation or synthesis, such as handling of missing summary statistics, or data conversions.                                                                                                                                | 2.5.                            |
|                               | 13c    | Describe any methods used to tabulate or visually display results of individual studies and syntheses.                                                                                                                                                                               | 2.5.                            |
|                               | 13d    | Describe any methods used to synthesize results and provide a rationale for the choice(s). If meta-analysis was performed, describe the model(s), method(s) to identify the presence and extent of statistical heterogeneity, and software package(s) used.                          | 2.5.                            |
|                               | 13e    | Describe any methods used to explore possible causes of heterogeneity among study results (e.g. subgroup analysis, meta-regression).                                                                                                                                                 | 2.5.                            |
|                               | 13f    | Describe any sensitivity analyses conducted to assess robustness of the synthesized results.                                                                                                                                                                                         | 2.5.                            |
| Reporting bias assessment     | 14     | Describe any methods used to assess risk of bias due to missing results in a synthesis (arising from reporting biases).                                                                                                                                                              | 2.5.                            |
| Certainty assessment          | 15     | Describe any methods used to assess certainty (or confidence) in the body of evidence for an outcome.                                                                                                                                                                                | 2.5.                            |
| <b>RESULTS</b>                |        |                                                                                                                                                                                                                                                                                      |                                 |
| Study selection               | 16a    | Describe the results of the search and selection process, from the number of records identified in the search to the number of studies included in the review, ideally using a flow diagram.                                                                                         | 3.1.                            |
|                               | 16b    | Cite studies that might appear to meet the inclusion criteria, but which were excluded, and explain why they were excluded.                                                                                                                                                          | 3.1.                            |
| Study characteristics         | 17     | Cite each included study and present its characteristics.                                                                                                                                                                                                                            | 3.1.                            |
| Risk of bias in studies       | 18     | Present assessments of risk of bias for each included study.                                                                                                                                                                                                                         | 3.2.                            |
| Results of individual studies | 19     | For all outcomes, present, for each study: (a) summary statistics for each group (where appropriate) and (b) an effect estimate and its precision (e.g. confidence/credible interval), ideally using structured tables or plots.                                                     | 3.2., 3.3                       |
| Results of syntheses          | 20a    | For each synthesis, briefly summarise the characteristics and risk of bias among contributing studies.                                                                                                                                                                               | 3.2., 3.3                       |
|                               | 20b    | Present results of all statistical syntheses conducted. If meta-analysis was done, present for each the summary estimate and its precision (e.g. confidence/credible interval) and measures of statistical heterogeneity. If comparing groups, describe the direction of the effect. | 3.2., 3.3, 3.5                  |
|                               | 20c    | Present results of all investigations of possible causes of heterogeneity among study results.                                                                                                                                                                                       | 3.2., 3.3,                      |
|                               | 20d    | Present results of all sensitivity analyses conducted to assess the robustness of the synthesized results.                                                                                                                                                                           | 3.2., 3.3., 3.4                 |

| Section and Topic                              | Item # | Checklist item                                                                                                                                                                                                                             | Location where item is reported        |
|------------------------------------------------|--------|--------------------------------------------------------------------------------------------------------------------------------------------------------------------------------------------------------------------------------------------|----------------------------------------|
| Reporting biases                               | 21     | Present assessments of risk of bias due to missing results (arising from reporting biases) for each synthesis assessed.                                                                                                                    | 3.2., 3.3                              |
| Certainty of evidence                          | 22     | Present assessments of certainty (or confidence) in the body of evidence for each outcome assessed.                                                                                                                                        | Discussion                             |
| <b>DISCUSSION</b>                              |        |                                                                                                                                                                                                                                            |                                        |
| Discussion                                     | 23a    | Provide a general interpretation of the results in the context of other evidence.                                                                                                                                                          | Discussion, 4.1.                       |
|                                                | 23b    | Discuss any limitations of the evidence included in the review.                                                                                                                                                                            | 4.2.                                   |
|                                                | 23c    | Discuss any limitations of the review processes used.                                                                                                                                                                                      | 4.2                                    |
|                                                | 23d    | Discuss implications of the results for practice, policy, and future research.                                                                                                                                                             | 4.2, Conclusions                       |
| <b>OTHER INFORMATION</b>                       |        |                                                                                                                                                                                                                                            |                                        |
| Registration and protocol                      | 24a    | Provide registration information for the review, including register name and registration number, or state that the review was not registered.                                                                                             | Abstract, 2.                           |
|                                                | 24b    | Indicate where the review protocol can be accessed, or state that a protocol was not prepared.                                                                                                                                             | Described in the methods               |
|                                                | 24c    | Describe and explain any amendments to information provided at registration or in the protocol.                                                                                                                                            | Not needed                             |
| Support                                        | 25     | Describe sources of financial or non-financial support for the review, and the role of the funders or sponsors in the review.                                                                                                              | Reported in funding statement.         |
| Competing interests                            | 26     | Declare any competing interests of review authors.                                                                                                                                                                                         | No competing interests                 |
| Availability of data, code and other materials | 27     | Report which of the following are publicly available and where they can be found: template data collection forms; data extracted from included studies; data used for all analyses; analytic code; any other materials used in the review. | Supplement files and manuscript tables |

**Supplemental Table 2.** Reviewed study references.

| Citation (sorted A to Z)                                                                                                                                                                                                                                                                                                                                                                                                                                                     |
|------------------------------------------------------------------------------------------------------------------------------------------------------------------------------------------------------------------------------------------------------------------------------------------------------------------------------------------------------------------------------------------------------------------------------------------------------------------------------|
| 2013 NASPSPA Conference abstract collection: Motor learning and control; Developmental perspectives: Motor control/coordination/rehabilitation; Sport and exercise psychology. (2013). <i>Journal of Sport &amp; Exercise Psychology</i> , 35(Suppl), 16–122.                                                                                                                                                                                                                |
| Abatzoglou, G., Kalogiannis, P., Sagovits, A., & Papaioannou, A. (2009). The Influence of Physical Education Teacher, Mother, and Best Friend, in Goal Achievement, Satisfaction in Physical Education and Exercise Participation of the Students that are not Athletes. <i>Inquiries in Sport &amp; Physical Education</i> , 7(3), 265–278.                                                                                                                                 |
| Abós Catalán, Á., Sevil Serrano, J., Martín-Albo Lucas, J., Julián Clemente, J. A., & García-González, L. (2018). An integrative framework to validate the Need-Supportive Teaching Style Scale (NSTSS) in secondary teachers through exploratory structural equation modeling. <i>Contemporary Educational Psychology</i> , 52, 48–60. <a href="https://doi.org/10.1016/j.cedpsych.2018.01.001">https://doi.org/10.1016/j.cedpsych.2018.01.001</a>                          |
| Abrahamsen, F. E., & Kristiansen, E. (2015). The Dark Side of a Mastery Emphasis: Can Mastery Involvement Create Stress and Anxiety? <i>International Journal of Applied Sports Sciences</i> , 27(2), 76–86. <a href="https://doi.org/10.24985/ijass.2015.27.2.76">https://doi.org/10.24985/ijass.2015.27.2.76</a>                                                                                                                                                           |
| Abrahamsen, F. E., & Pensgaard, A. M. (2012). Longitudinal Changes in Motivational Climate and Performance Anxiety Among Elite Handball Players. <i>International Journal of Applied Sports Sciences</i> , 24(1), 31–42. <a href="https://doi.org/10.24985/ijass.2012.24.1.31">https://doi.org/10.24985/ijass.2012.24.1.31</a>                                                                                                                                               |
| Abrahamsen, F. E., Roberts, G. C., & Pensgaard, A. M. (2008). Achievement goals and gender effects on multidimensional anxiety in national elite sport. <i>Psychology of Sport &amp; Exercise</i> , 9(4), 449–464.                                                                                                                                                                                                                                                           |
| Abrahamsen, F. E., Roberts, G. C., Pensgaard, A. M., & Ronglan, L. T. (2008). Perceived ability and social support as mediators of achievement motivation and performance anxiety. <i>Scandinavian Journal of Medicine &amp; Science in Sports</i> , 18(6), 810–821.                                                                                                                                                                                                         |
| Abraldes, J. A., Granero-Gallegos, A., & Baena-Extremuera, A. (2016). Orientaciones de meta, satisfacción, creencias de éxito y clima motivacional en nadadores / Goal Orientations, Satisfaction, Beliefs in Sport Success and Motivational Climate in Swimmers. <i>Revista Internacional de Medicina y Ciencias de La Actividad Física y Del Deporte</i> , 63(2016). <a href="https://doi.org/10.15366/rimcafd2016.63.011">https://doi.org/10.15366/rimcafd2016.63.011</a> |

|                                                                                                                                                                                                                                                                                                                                                                                                                                                                                                                                                       |
|-------------------------------------------------------------------------------------------------------------------------------------------------------------------------------------------------------------------------------------------------------------------------------------------------------------------------------------------------------------------------------------------------------------------------------------------------------------------------------------------------------------------------------------------------------|
| Ahmadi, M., Mehdi Namazizadeh, M., & Mokhtari, P. (2012). Perceived motivational climate, basic psychological needs and self-determined motivation in youth male athletes. <i>World Applied Sciences Journal</i> 16 (9): 1189-1195.                                                                                                                                                                                                                                                                                                                   |
| Al-Yaaribi, A., & Kavussanu, M. (2018). Consequences of prosocial and antisocial behaviors in adolescent male soccer players: The moderating role of motivational climate. <i>Psychology of Sport and Exercise</i> , 37, 91–99. <a href="https://doi.org/10.1016/j.psychsport.2018.04.005">https://doi.org/10.1016/j.psychsport.2018.04.005</a>                                                                                                                                                                                                       |
| Alesi, M., Gómez-López, M., Chicau Borrego, C., Monteiro, D., & Granero-Gallegos, A. (2019). Effects of a Motivational Climate on Psychological Needs Satisfaction, Motivation and Commitment in Teen Handball Players. <i>International Journal of Environmental Research and Public Health</i> , 16(15), 2702. <a href="https://doi.org/10.3390/ijerph16152702">https://doi.org/10.3390/ijerph16152702</a>                                                                                                                                          |
| Alferman et al. 2013                                                                                                                                                                                                                                                                                                                                                                                                                                                                                                                                  |
| Alfermann, D., Geisler, G., & Okade, Y. (2013). Goal orientation, evaluative fear, and perceived coach behavior among competitive youth swimmers in Germany and Japan. <i>Psychology of Sport and Exercise</i> , 14(3), 307–315. <a href="https://doi.org/10.1016/j.psychsport.2012.11.005">https://doi.org/10.1016/j.psychsport.2012.11.005</a>                                                                                                                                                                                                      |
| Alfermann, D., Geisler, G., & Okade, Y. (2013). Goal orientation, evaluative fear, and perceived coach behavior among competitive youth swimmers in Germany and Japan. <i>Psychology of Sport and Exercise</i> , 14(3), 307–315. <a href="https://doi.org/10.1016/j.psychsport.2012.11.005">https://doi.org/10.1016/j.psychsport.2012.11.005</a>                                                                                                                                                                                                      |
| Allen, J. B., & Hodge, K. (2006). Fostering a Learning Environment: Coaches and the Motivational Climate. <i>International Journal of Sports Science &amp; Coaching</i> , 1(3), 261–277. <a href="https://doi.org/10.1260/174795406778604564">https://doi.org/10.1260/174795406778604564</a>                                                                                                                                                                                                                                                          |
| Allen, J. B., & Shaw, S. (2009). “Everyone rolls up their sleeves and mucks in”: Exploring volunteers’ motivation and experiences of the motivational climate of a sporting event. <i>Sport Management Review</i> , 12(2), 79–90.                                                                                                                                                                                                                                                                                                                     |
| Almagro, B. J., & Conde, C. (2012). Factores motivacionales como predictores de la intención de ser físicamente activos en jóvenes jugadores de baloncesto. / Motivational factors as predictors of young basketball players’ intention to be physically active. <i>Cuadernos de Psicología Del Deporte</i> , 12(S1), 1–4.                                                                                                                                                                                                                            |
| Almagro, B. J., Sáenz-López, P., González-Cutre, D., & Moreno-Murcia, J. A. (2011). Clima motivacional percibido, necesidades psicológicas y motivación intrínseca como predictores del compromiso deportivo en adolescentes. (Perceived motivational climate, psychological needs and intrinsic motivation as predictors of sport commitment in adolescent athletes). <i>RICYDE. Revista Internacional de Ciencias Del Deporte</i> , 7(24), 250–265. <a href="https://doi.org/10.5232/ricyde2011.02501">https://doi.org/10.5232/ricyde2011.02501</a> |

- Almagro, B. J., Sáenz-López, P., González-Cutre, D., & Moreno-Murcia, J. A. (2011). Clima motivacional percibido, necesidades psicológicas y motivación intrínseca como predictores del compromiso deportivo en adolescentes. (Perceived motivational climate, psychological needs and intrinsic motivation as predictors of sport commitment in adolescent athletes). RICYDE. Revista Internacional de Ciencias Del Deporte, 7(24), 250–265. <https://doi.org/10.5232/ricyde2011.02501>
- Almagro, Bartolomé J.; Sáenz-López, Pedro; Moreno-Murcia, Juan Antonio Perfiles motivacionales de deportistas adolescentes españoles Revista de Psicología del Deporte, vol. 21, núm. 2, 2012, pp. 223-231
- Almolda-Tomás, F. J., Sevil-Serrano, J., Julián-Clemente, J. A., Abarca-Sos, A., Aibar-Solana, A., & García-González, L. (2014). Application of teaching strategies for improving students' situational motivation in physical education. Electronic Journal of Research in Educational Psychology, 12(2), 391–418.
- Alvarez, M. S., Balaguer, I., Castillo, I., & Duda, J. L. (2012). The Coach-Created Motivational Climate, Young Athletes' Well-Being, and Intentions to Continue Participation. Journal of Clinical Sport Psychology, 6(2), 166–179. <https://doi.org/10.1123/jcsp.6.2.166>
- Amaro, N., Monteiro, D., Rodrigues, F., Matos, R., Jacinto, M., Cavaco, B., Jorge, S., & Antunes, R. (2023). Task-Involving Motivational Climate and Enjoyment in Youth Male Football Athletes: The Mediation Role of Self-Determined Motivation. International Journal of Environmental Research and Public Health, 20(4), 3044. <https://doi.org/10.3390/ijerph20043044>
- Appleton, P. R., & Duda, J. L. (2016). Examining the interactive effects of coach-created empowering and disempowering climate dimensions on athletes' health and functioning. Psychology of Sport and Exercise, 26, 61–70. <https://doi.org/10.1016/j.psychsport.2016.06.007>
- Appleton, P., Hall, H., & Hill, A. (2011). Examining the influence of the parent-initiated and coach-created motivational climates upon athletes' perfectionistic cognitions. Journal of Sports Sciences, 29(7), 661–671.
- Atkins, M. R., Johnson, D. M., Force, E. C., & Petrie, T. A. (2013). “Do I Still Want to Play?” Parents' and Peers' Influences on Girls' Continuation in Sport. Journal of Sport Behavior, 36(4), 329–345.
- Atkins, M. R., Johnson, D. M., Force, E. C., & Petrie, T. A. (2015). Peers, parents, and coaches, oh my! The relation of the motivational climate to boys' intention to continue in sport. Psychology of Sport and Exercise, 16, 170–180. <https://doi.org/10.1016/j.psychsport.2014.10.008>

|                                                                                                                                                                                                                                                                                                                                                                                                                                                                                                                                                 |
|-------------------------------------------------------------------------------------------------------------------------------------------------------------------------------------------------------------------------------------------------------------------------------------------------------------------------------------------------------------------------------------------------------------------------------------------------------------------------------------------------------------------------------------------------|
| <p>Baena-Extremera, A., Gómez-López, M., Granero-Gallegos, A., &amp; Martínez-Molina, M. (2016). Modelo de predicción de la satisfacción y diversión en Educación Física a partir de la autonomía y el clima motivacional = Prediction model of satisfaction and enjoyment in Physical Education from the autonomy and motivational climate. <i>Universitas Psychologica</i>, 15(2), 15–25.</p>                                                                                                                                                 |
| <p>Baena-Extremera, A., Gómez-López, M., Granero-Gallegos, A., &amp; Ortiz-Camacho, M. del M. (2015). Predicting Satisfaction in Physical Education From Motivational Climate and Self-determined Motivation. <i>Journal of Teaching in Physical Education</i>, 34(2), 210–224.<br/> <a href="https://doi.org/10.1123/jtpe.2013-0165">https://doi.org/10.1123/jtpe.2013-0165</a></p>                                                                                                                                                            |
| <p>Balaguer, I., Castillo, I., Duda, J. L., &amp; García-Merita, M. (2011). Asociaciones entre la percepción del clima motivacional creado por el entrenador, orientaciones disposicionales de meta, regulaciones motivacionales y vitalidad subjetiva en jóvenes jugadoras de tenis = Associations between the perception of motivational climate created by coaches, dispositional goal orientations, forms of self-regulation and subjective vitality in young tennis players. <i>Revista de Psicología Del Deporte</i>, 20(1), 133–148.</p> |
| <p>Balaguer, I., Duda, J. L., &amp; Castillo, I. (2017). Motivational Antecedents of Well-Being and Health Related Behaviors in Adolescents. <i>Journal of Human Kinetics</i>, 59(1), 121–130. <a href="https://doi.org/10.1515/hukin-2017-0152">https://doi.org/10.1515/hukin-2017-0152</a></p>                                                                                                                                                                                                                                                |
| <p>Balaguer, I., Duda, J. L., &amp; Crespo, M. (1999). Motivational climate and goal orientations as predictors of perceptions of improvement, satisfaction and coach ratings among tennis players. <i>Scandinavian Journal of Medicine &amp; Science in Sports</i>, 9(6), 381.</p>                                                                                                                                                                                                                                                             |
| <p>Balaguer, I., Duda, J. L., Atienza, F. L., &amp; Mayo, C. (2002). Situational and dispositional goals as predictors of perceptions of individual and team improvement, satisfaction and coach ratings among elite female handball teams. <i>Psychology of Sport and Exercise</i>, 3(4), 293–308.<br/> <a href="https://doi.org.lib.ttu.edu/10.1016/S1469-0292(01)00025-5">https://doi.org.lib.ttu.edu/10.1016/S1469-0292(01)00025-5</a></p>                                                                                                  |
| <p>Baños, R., &amp; Arrayales, E. (2020). Predicción del aburrimiento en la educación física a partir del clima motivacional (Prediction of boredom in physical education from the motivational climate). <i>Retos</i>, 38, 83–88. <a href="https://doi.org/10.47197/retos.v38i38.74301">https://doi.org/10.47197/retos.v38i38.74301</a></p>                                                                                                                                                                                                    |
| <p>BAO Xiao-ling, YANG Jun-min, &amp; ZHANG Jiang-ying. (2010). The Intervention Research on the Influence of Subjective Well-being from Different Motivational Climate in P. E among College and Middle School Students. <i>Journal of Beijing Sport University</i>, 33(5), 96–100.</p>                                                                                                                                                                                                                                                        |
| <p>Barić, R. (2000). Verification of a motivational climate inventory in a sports setting. <i>Kinesiology</i>, 32(2), 106–116.</p>                                                                                                                                                                                                                                                                                                                                                                                                              |
| <p>Barić, R. (2011). Psychological pressure and athletes' perception of motivational climate in team sports. <i>Review of Psychology</i>, 18(1), 45–49.</p>                                                                                                                                                                                                                                                                                                                                                                                     |



|                                                                                                                                                                                                                                                                                                                                                                                      |
|--------------------------------------------------------------------------------------------------------------------------------------------------------------------------------------------------------------------------------------------------------------------------------------------------------------------------------------------------------------------------------------|
| Barkoukis, V., Koidou, E., & Tsorbatzoudis, H. (2010). Effects of a motivational climate intervention on state anxiety, self-efficacy, and skill development in physical education. <i>European Journal of Sport Science</i> , 10(3), 167–177.                                                                                                                                       |
| Barkoukis, V., Ntoumanis, N., & Thøgersen-Ntoumani, C. (2010). Developmental changes in achievement motivation and affect in physical education: Growth trajectories and demographic differences. <i>Psychology of Sport &amp; Exercise</i> , 11(2), 83–90.                                                                                                                          |
| Bekiari, A. & Syrmpas, I. (2015). Coaches' verbal aggressiveness and motivational climate as predictors of athletes' satisfaction. <i>British Journal of Education, Society &amp; Behavioural Science</i> 9(4): 318-329, 2015.                                                                                                                                                       |
| Blecharz et al. 2014 Study 2 data                                                                                                                                                                                                                                                                                                                                                    |
| Blecharz, J., Horodyska, K., Zarychta, K., Adamiec, A., & Luszczynska, A. (2015). Intrinsic Motivation Predicting Performance Satisfaction in Athletes: Further Psychometric Evaluations of the Sport Motivation Scale-6. <i>Polish Psychological Bulletin</i> , 46(2), 309–319.<br><a href="https://doi.org/10.1515/ppb-2015-0037">https://doi.org/10.1515/ppb-2015-0037</a>        |
| Blecharz, J., Luszczynska, A., Tenenbaum, G., Scholz, U., & Cieslak, R. (2014). Self-Efficacy Moderates but Collective Efficacy Mediates between Motivational Climate and Athletes' Well-Being. <i>Applied Psychology: Health and Well-Being</i> , 6(3), 280–299. Portico.<br><a href="https://doi.org/10.1111/aphw.12028">https://doi.org/10.1111/aphw.12028</a>                    |
| Boiché, J., Gurlan, M., & Rubin, L. (2018). Impact of a residential program on the psychological needs, motivation and physical activity of obese adults: A controlled trial based on Self-Determination Theory. <i>Movement &amp; Sport Sciences - Science &amp; Motricité</i> , 101, 33–40.<br><a href="https://doi.org/10.1051/sm/2018013">https://doi.org/10.1051/sm/2018013</a> |
| Boixadós i Anglès, M., & Cruz i Feliu, J. (1999). Relaciones entre clima motivacional y satisfacción, percepción de habilidad y actitudes de fairplay en futbolistas jóvenes = Relationships between motivational climate and satisfaction, perceived ability and fairplay attitudes in young soccer players. <i>Revista de Psicología Social Aplicada</i> , 9(1), 45–64.            |
| Boixadós, M., Cruz, J., Torregrosa, M., & Valiente, L. (2003). Relationships Among Motivational Climate, Satisfaction, Perceived Ability, and Fair Play Attitudes in Young Soccer Players. <i>Journal of Applied Sport Psychology</i> , 16(4), 301–317.<br><a href="https://doi.org.lib.ttu.edu/10.1080/10413200490517977">https://doi.org.lib.ttu.edu/10.1080/10413200490517977</a> |
| Bono, B., & Livi, S. (2016). Motivazione al successo in atleti di élite: applicazione del 2X2 Achievement Goal Framework nel nuoto = Achievement motivation in elite athletes: Application of 2X2 Achievement Goal Framework in swimming. <i>Rassegna Di Psicologia</i> , 33(1), 51–66.                                                                                              |

- Borghouts, L., Slingerland, M., Weeldenburg, G., van Dijk-van Eijk, B., Laurijssens, S., Remmers, T., & Haerens, L. (2023). Effectiveness of a lesson study intervention on teacher behaviour and student motivation in physical education lessons. *Physical Education and Sport Pedagogy*, 28(2), 121–138. <https://doi.org/10.1080/17408989.2021.1958175>
- Bortoli, L., Bertollo, M., & Robazza, C. (2009). Dispositional goal orientations, motivational climate, and psychobiosocial states in youth sport. *Personality and Individual Differences*, 47(1), 18–24. <https://doi-org.lib-e2.lib.ttu.edu/10.1016/j.paid.2009.01.042>
- Bortoli, L., Bertollo, M., Comani, S., & Robazza, C. (2011). Competence, achievement goals, motivational climate, and pleasant psychobiosocial states in youth sport. *Journal of Sports Sciences*, 29(2), 171–180. <https://doi.org/10.1080/02640414.2010.530675>
- Bortoli, L., Vitali, F., Di Battista, R., Ruiz, M. C., & Robazza, C. (2018). Initial validation of the psychobiosocial states in physical education (PBS-SPE) scale. *Frontiers in Psychology*, 9.
- Braithwaite, R., Spray, C. M., & Warburton, V. E. (2011). Motivational climate interventions in physical education: A meta-analysis. *Psychology of Sport and Exercise*, 12(6), 628–638. <https://doi-org.lib-e2.lib.ttu.edu/10.1016/j.psychsport.2011.06.005>
- Breiger, J., Cumming, S. P., Smith, R. E., Smoll, F., & Brewer, B. (2015). Winning, Motivational Climate, and Young Athletes' Competitive Experiences: Some Notable Sex Differences. *International Journal of Sports Science & Coaching*, 10(2/3), 395–411.
- Breske, M. P., Fry, M. D., Fry, A. C., & Hogue, C. M. (2017). The effects of goal priming on cortisol responses in an ego-involving climate. *Psychology of Sport and Exercise*, 32, 74–82. <https://doi.org/10.1016/j.psychsport.2017.06.001>
- Brinkman-Majewski, R. E., & Weiss, W. M. (2015). Examination of the Motivational Climate in the Athletic Training Room. *Journal of Sport Behavior*, 38(2), 143–160.
- Brinkman-Majewski, R. E., & Weiss, W. M. (2018). The Motivational Climate and Intrinsic Motivation in the Rehabilitation Setting. *Journal of Sport Rehabilitation*, 27(5), 460–468. <https://doi.org/10.1123/jsr.2016-0228>
- Brinkman-Majewski, R. E., & Weiss, W. M. (2022). The Influence of the Motivational Climate on Rehabilitation Behaviors and Patient Satisfaction. *Journal of Sport Rehabilitation*, 31(8), 1016–1022. <https://doi.org/10.1123/jsr.2021-0369>
- Brisimis, E., Krommidas, C., Syrmipas, I., Karamitrou, A., Hatzigeorgiadis, A., & Comoutos, N. (2022). Motivational Climate, Basic Psychological Needs, and Students' Self-Talk in Physical Education. *The Physical Educator*, 79(3), 280–304. <https://doi.org/10.18666/tpe-2022-v79-i3-10851>

Broo, N., Ballart, P., Juan, B., Valls, A., & Latinjak, A. (2012). Motivación Situacional Y Estado Afectivo en Clases Dirigidas De Actividad Física. Motricidad: European Journal of Human Movement, 29, 147–158.

Brown, T. C., & Fry, M. D. (2014a). Motivational Climate, Staff and Members' Behaviors, and Members' Psychological Well-Being at a National Fitness Franchise. Research Quarterly for Exercise and Sport, 85(2), 208–217. <https://doi.org/10.1080/02701367.2014.893385>

Brown, T. C., & Fry, M. D. (2014b). College Exercise Class Climates, Physical Self-Concept, and Psychological Well-Being. Journal of Clinical Sport Psychology, 8(3), 299–313. <https://doi.org/10.1123/jcsp.2014-0031>

Brown, T. C., Fry, M. D., & Moore, E. W. G. (2017). A motivational climate intervention and exercise-related outcomes: A longitudinal perspective. Motivation Science, 3(4), 337–353. <https://doi.org/10.1037/mot0000059>

Brown, T. C., Fry, M. D., & Moore, E. W. G. (2017). A motivational climate intervention and exercise-related outcomes: A longitudinal perspective. Motivation Science, 3(4), 337–353. <https://doi.org/10.1037/mot0000059>

Brown, T. C., Fry, M. D., Wilkinson, T. J., Breske, M. P., & Susumu Iwasaki. (2019). Motivational Climate and Athletes' Likelihood of Reporting Concussions in a Youth Competitive Soccer League. Journal of Sport Behavior, 42(1), 29–47.

Bryan, C. L., & Solmon, M. A. (2012). Student Motivation in Physical Education and Engagement in Physical Activity. Journal of Sport Behavior, 35(3), 267–285.

Calvo, C., & Topa, G. (2019). Leadership and Motivational Climate: The Relationship with Objectives, Commitment, and Satisfaction in Base Soccer Players. Behavioral Sciences, 9(3), 29. <https://doi.org/10.3390/bs9030029>

Carr, S., & Wyon, M. (2003). The Impact of Motivational Climate on Dance Students' Achievement Goals, Trait Anxiety, and Perfectionism. Journal of Dance Medicine & Science, 7(4), 105–114. <https://doi.org/10.1177/1089313x0300700401>

Carr, S., Phil, M., & Wyon, M. (2003). The impact of motivational climate on dance students' achievement goals, trait anxiety, and perfectionism. Journal of Dance Medicine & Science, 7(4), 105–114.

Castillo Jiménez, N., López-Walle, J. M., Tomás, I., & Balaguer, I. (2017). Relación del clima empowering con la motivación autodeterminada a través de la satisfacción de las necesidades psicológicas básicas. Journal of Sport Psychology / Revista de Psicología Del Deporte, 26, 33–39.

- Castillo, I., Duda, J. L., Álvarez, M. S., Mercé, J., & Balaguer, I. (2011). Clima motivacional, metas de logro de aproximación y evitación y bienestar en futbolistas cadetes = Motivational climate, approach-avoidance achievement goals and well-being in young soccer players. *Revista de Psicología Del Deporte*, 20(1), 149–164.
- Castillo, I., Ramis, Y., Cruz, J., & Balaguer, I. (2015). Formación de Entrenadores de Fútbol Base en el Proyecto PAPA = Grassroots coaches' training in the PAPA project. *Revista de Psicología Del Deporte*, 24(1), 131–138.
- Castro-Sánchez, M., Zurita-Ortega, F., Chacón-Cuberos, R., & Lozano-Sánchez, A. M. (2018). Clima motivacional y niveles de ansiedad en futbolistas de categorías inferiores (Motivational climate and levels of anxiety in soccer players of lower divisions). *Retos*, 35, 164–169. <https://doi.org/10.47197/retos.v0i35.63308>
- Castro-Sánchez, M., Zurita-Ortega, F., Zafra-Santos, E., Rodríguez-Fernández, S., Chacón-Cuberos, R., & Valdivia-Moral, P. (2019). MOTIVACIÓN EN LA PRÁCTICA DEL JUDO EN DEPORTISTAS NO PROFESIONALES. *Revista Internacional de Medicina y Ciencias de La Actividad Física y Del Deporte*, 19(74). <https://doi.org/10.15366/rimcafd2019.74.005>
- Cecchini, J. A., Carriedo, A., & Méndez-Giménez, A. (2019). Testing a circular, feedback model in physical education from self-determination theory. *Journal of Educational Research*, 112(4), 473–482. <https://doi.org/10.1080/00220671.2018.1555788>
- Cecchini, J. A., Carriedo, A., & Méndez-Giménez, A. (2019). Testing a circular, feedback model in physical education from self-determination theory. *The Journal of Educational Research*, 112(4), 473–482. <https://doi.org/10.1080/00220671.2018.1555788>
- Cecchini, J. A., Fernandez-Rio, J., Mendez-Gimenez, A., Cecchini, C., & Martins, L. (2014). Epstein's TARGET Framework and Motivational Climate in Sport: Effects of a Field-Based, Long-Term Intervention Program. *International Journal of Sports Science & Coaching*, 9(6), 1325–1340. <https://doi.org/10.1260/1747-9541.9.6.1325>
- Cecchini, J. A., González, C., Carmona, Á. M., & Contreras, O. (2004). Relaciones entre clima motivacional, la orientación de meta, la motivación intrínseca, la auto-confianza, la ansiedad y el estado de ánimo en jóvenes deportistas = Relationships among motivational climate, achievement goals, intrinsic motivation, self-confidence, anxiety, and mood in young sport players. *Psicothema*, 16(1), 104–109.
- Cecchini, J. A., Gonzalez, C., Carmona, A. M., Arruza, J., Escarti, A., & Balague, G. (2001). The Influence of the Physical Education Teacher on Intrinsic Motivation, Self-Confidence, Anxiety, and Pre- and Post-Competition Mood States. *European Journal of Sport Science*, 1(4), 1.

- Cecchini, J. A., González, C., Prado, J. L., & Brustad, R. J. (2005). Relación del Clima Motivacional Percibido con la Orientación de Meta, la Motivación Intrínseca y las Opiniones y Conductas de Fair Play = The relationship between perceived motivational climate and goal orientation, intrinsic motivation and fair play conducts and viewpoints. *Revista Mexicana de Psicología*, 22(2), 469–479.
- Cervelló, E. M., & Santos-Rosa, F. J. (2001). Motivation in sport: An achievement goal perspective in young Spanish recreational athletes. *Perceptual and Motor Skills*, 92(2), 527–534. <https://doi.org.lib.ttu.edu/10.2466/PMS.92.2.527-534>
- Chacón-Cuberos, R., Castro-Sánchez, M., Pérez-Turpin, J. A., Olmedo-Moreno, E. M., & Zurita Ortega, F. (2019). Levels of Physical Activity Are Associated With the Motivational Climate and Resilience in University Students of Physical Education From Andalucía: An Explanatory Model. *Frontiers in Psychology*, 10. <https://doi.org/10.3389/fpsyg.2019.01821>
- Chan, D. K., Lonsdale, C., & Fung, H. H. (2011). Influences of coaches, parents, and peers on the motivational patterns of child and adolescent athletes. *Scandinavian Journal of Medicine & Science in Sports*, 22(4), 558–568. Portico. <https://doi.org/10.1111/j.1600-0838.2010.01277.x>
- Chen, L. H., Wu, C.-H., Ni, Y.-L., & Kuo, C.-C. (2021). The differential interaction effect of mastery and performance climate on athletes' emotional and physical exhaustion: The role of athletes' gratitude. *Sport, Exercise, and Performance Psychology*, 10(3), 394–407. <https://doi.org/10.1037/spy0000257>
- Cheon, S. H., Reeve, J., & Ntoumanis, N. (2019). An intervention to help teachers establish a prosocial peer climate in physical education. *Learning and Instruction*, 64, 101223. <https://doi.org/10.1016/j.learninstruc.2019.101223>
- Chu, T. L. (Alan), Treacy, A., Moore, E. W. G., Petrie, T. A., Albert, E., & Zhang, T. (2023). Intersectionality matters: Gender, race/ethnicity, and sport level differentiate perceived coach-created motivational climates and psychological needs. *Sport, Exercise, and Performance Psychology*. <https://doi-org.lib-e2.lib.ttu.edu/10.1037/spy0000331.supp> (Supplemental)
- Chu, T. L. (Alan), Treacy, A., Moore, E. W. G., Petrie, T. A., Albert, E., & Zhang, T. (2023). Intersectionality matters: Gender, race/ethnicity, and sport level differentiate perceived coach-created motivational climates and psychological needs. *Sport, Exercise, and Performance Psychology*. <https://doi.org.10.1037/spy0000331.supp>
- Chu, T. L. (Alan), Zhang, X., Lee, J., & Zhang, T. (2021). Perceived coach-created environment directly predicts high school athletes' physical activity during sport. *International Journal of Sports Science & Coaching*, 16(1), 70–80. <https://doi.org/10.1177/1747954120959733>

- Cid, L., Pires, A., Borrego, C., Duarte-Mendes, P., Teixeira, D. S., Moutão, J. M., & Monteiro, D. (2019). Motivational determinants of physical education grades and the intention to practice sport in the future. *PLOS ONE*, 14(5), e0217218. <https://doi.org/10.1371/journal.pone.0217218>
- Cid, L., Pires, A., Borrego, C., Duarte-Mendes, P., Teixeira, D. S., Moutão, J. M., & Monteiro, D. (2019). Motivational determinants of physical education grades and the intention to practice sport in the future. *PLoS ONE*, 14(5). <https://doi-org.lib-e2.lib.ttu.edu/10.1371/journal.pone.0217218>
- Clancy, R. B., Herring, M. P., MacIntyre, T. E., & Campbell, M. J. (2016). A review of competitive sport motivation research. *Psychology of Sport & Exercise*, 27, 232–242.
- Connaughton, D., Wadey, R., Hanton, S., & Jones, G. (2008). The development and maintenance of mental toughness: Perceptions of elite performers. *Journal of Sports Sciences*, 26(1), 83–95.
- Connaughton, D., Wadey, R., Hanton, S., & Jones, G. (2008). The development and maintenance of mental toughness: Perceptions of elite performers. *Journal of Sports Sciences*, 26(1), 83–95. <https://doi.org/10.1080/02640410701310958>
- Conroy, D. E., & Douglas Coatsworth, J. (2007). Assessing autonomy-supportive coaching strategies in youth sport. *Psychology of Sport and Exercise*, 8(5), 671–684. <https://doi.org/10.1016/j.psychsport.2006.12.001>
- Coudevylle, G. R., & Martin Ginis, K. A. (2007). An experimental investigation of determinants and consequences of self-handicapping strategies across motivational climates. *Journal of Sport & Exercise Psychology*, 29, S153–S154.
- Cox, A., & Williams, L. (2008). The Roles of Perceived Teacher Support, Motivational Climate, and Psychological Need Satisfaction in Students' Physical Education Motivation. *Journal of Sport and Exercise Psychology*, 30(2), 222–239. <https://doi.org/10.1123/jsep.30.2.222>
- Cronin, L., Marchant, D., Allen, J., Mulvenna, C., Cullen, D., Williams, G., & Ellison, P. (2019). Students' perceptions of autonomy-supportive versus controlling teaching and basic need satisfaction versus frustration in relation to life skills development in PE. *Psychology of Sport and Exercise*, 44, 79–89. <https://doi.org/10.1016/j.psychsport.2019.05.003>
- Cumming, S. P., Smith, R. E., Smoll, F. L., Standage, M., & Grossbard, J. R. (2008). Development and validation of the Achievement Goal Scale for Youth Sports. *Psychology of Sport & Exercise*, 9(5), 686–703.
- Cumming, S. P., Smoll, F. L., Smith, R. E., & Grossbard, J. R. (2007). Is Winning Everything? The Relative Contributions of Motivational Climate and Won-Lost Percentage in Youth Sports. *Journal of Applied Sport Psychology*, 19(3), 322–336. <https://doi.org/10.1080/10413200701342640>

- Cunningham, G. B., & Xiang, P. (2008). Testing the mediating role of perceived motivational climate in the relationship between achievement goals and satisfaction: Are these relationships invariant across sex? *Journal of Teaching in Physical Education*, 27(2), 192–204. <https://doi-org.lib-e2.lib.ttu.edu/10.1123/jtpe.27.2.192>
- Curran, T., Hill, A. P., Hall, H. K., & Jowett, G. E. (2015). Relationships Between the Coach-Created Motivational Climate and Athlete Engagement in Youth Sport. *Journal of Sport and Exercise Psychology*, 37(2), 193–198. <https://doi.org/10.1123/jsep.2014-0203>
- Decroos, S., Lines, R. L. J., Morgan, P. B. C., Fletcher, D., Sarkar, M., Fransen, K., Boen, F., & Vande Broek, G. (2017). Development and validation of the Characteristics of Resilience in Sports Teams Inventory. *Sport, Exercise, and Performance Psychology*, 6(2), 158–178. <https://doi.org/10.1037/spy0000089>
- Di Battista, R., Robazza, C., Ruiz, M. C., Bertollo, M., Vitali, F., & Bortoli, L. (2019). Student intention to engage in leisure-time physical activity: The interplay of task-involving climate, competence need satisfaction and psychobiosocial states in physical education. *European Physical Education Review*, 25(3), 761–777. <https://doi.org/10.1177/1356336x18770665>
- Digelidis, N., Kotsaki, Z., & Papaioannou, A. (2005). Differences between Junior and Senior High School Students Concerning Intrinsic - Extrinsic Motivation in the Contextual Level, Goal Orientations, Motivational Climate and Perceived Athletic Ability in Greek Athletic Classes. *Inquiries in Sport & Physical Education*, 3(1), 77–89.
- Digellidis, N., & Krommidas, H. (2008). Fair Play in Physical Education Classes: Differences between Sex, Class and the Relationship between Fair Play and Lesson Satisfaction, Perceived Motivational Climate and Goal Orientations. *Inquiries in Sport & Physical Education*, 6(2), 1–14.
- Dorsch, T. E., Smith, A. L., & Dotterer, A. M. (2016). Individual, relationship, and context factors associated with parent support and pressure in organized youth sport. *Psychology of Sport and Exercise*, 23, 132–141. <https://doi.org/10.1016/j.psychsport.2015.12.003>
- Draugelis, S., Martin, J., & Garn, A. (2014). Psychosocial Predictors of Well-Being in Collegiate Dancers. *The Sport Psychologist*, 28(1), 1–9. <https://doi.org/10.1123/tsp.2012-0093>
- Duda, J. L., Quested, E., Haug, E., Samdal, O., Wold, B., Balaguer, I., Castillo, I., Sarrazin, P., Papaioannou, A., Ronglan, L. T., Hall, H., & Cruz, J. (2013). Promoting Adolescent health through an intervention aimed at improving the quality of their participation in Physical Activity (PAPA): Background to the project and main trial protocol. *International Journal of Sport and Exercise Psychology*, 11(4), 319–327. <https://doi.org/10.1080/1612197x.2013.839413>

|                                                                                                                                                                                                                                                                                                                                                                                                                                              |
|----------------------------------------------------------------------------------------------------------------------------------------------------------------------------------------------------------------------------------------------------------------------------------------------------------------------------------------------------------------------------------------------------------------------------------------------|
| Duguay, A. M., Loughhead, T. M., & Munroe-Chandler, K. J. (2016). The Development, Implementation, and Evaluation of an Athlete Leadership Development Program With Female Varsity Athletes. <i>The Sport Psychologist</i> , 30(2), 154–166. <a href="https://doi.org/10.1123/tsp.2015-0050">https://doi.org/10.1123/tsp.2015-0050</a>                                                                                                       |
| Elsborg, P., Appleton, P. R., Pons, J., Wikman, J. M., Bentsen, P., & Nielsen, G. (2023). Factorial validity, predictive validity and measurement invariance of the Danish version of the coach-created Empowering Disempowering Motivational Climate Questionnaire (EDMCQ-C). <i>Journal of Sports Sciences</i> , 41(8), 715–726. <a href="https://doi.org/10.1080/02640414.2023.2230707">https://doi.org/10.1080/02640414.2023.2230707</a> |
| Elsborg, P., Appleton, P., Wikman, J. M., & Nielsen, G. (2023). The associations between motivational climate, basic psychological needs and dropout in volleyball – A comparison across competitive levels. <i>European Journal of Sport Science</i> , 23(3), 393–403. <a href="https://doi.org/10.1080/17461391.2022.2041100">https://doi.org/10.1080/17461391.2022.2041100</a>                                                            |
| Erikstad, M. K., Høigaard, R., Côté, J., Turnnidge, J., & Haugen, T. (2021). An Examination of the Relationship Between Coaches' Transformational Leadership and Athletes' Personal and Group Characteristics in Elite Youth Soccer. <i>Frontiers in Psychology</i> , 12. <a href="https://doi.org/10.3389/fpsyg.2021.707669">https://doi.org/10.3389/fpsyg.2021.707669</a>                                                                  |
| Escartí, A., & Gutiérrez, M. (2001). Influence of the motivational climate in physical education on the intention to practice physical activity or sport. <i>European Journal of Sport Science</i> , 1(4), 1–12. <a href="https://doi.org/10.1080/17461390100071406">https://doi.org/10.1080/17461390100071406</a>                                                                                                                           |
| Eys, M. A., Jewitt, E., Evans, M. B., Wolf, S., Bruner, M. W., & Loughhead, T. M. (2013). Coach-Initiated Motivational Climate and Cohesion in Youth Sport. <i>Research Quarterly for Exercise and Sport</i> , 84(3), 373–383. <a href="https://doi.org/10.1080/02701367.2013.814909">https://doi.org/10.1080/02701367.2013.814909</a>                                                                                                       |
| Fenton, S. A. M., Duda, J. L., Appleton, P. R., & Barrett, T. G. (2017). Empowering youth sport environments: Implications for daily moderate-to-vigorous physical activity and adiposity. <i>Journal of Sport &amp; Health Science</i> , 6(4), 423–433.                                                                                                                                                                                     |
| Fernandes, V., Silva, S., & Dias, C. (2022). Clima motivacional e treino de competências psicológicas: Um estudo na ginástica de trampolins. <i>Revista Portuguesa de Ciências Do Desporto</i> , 22(2), 28–39. <a href="https://doi.org/10.5628/rpcd.22.02.28">https://doi.org/10.5628/rpcd.22.02.28</a>                                                                                                                                     |
| Fernandez-Rio, J., & Morales-Sallés, P. (2020). Student-designed games in secondary education Effects and perspectives from students and teachers. <i>The Journal of Educational Research</i> , 113(3), 204–212. <a href="https://doi-org.lib-e2.lib.ttu.edu/10.1080/00220671.2020.1778614">https://doi-org.lib-e2.lib.ttu.edu/10.1080/00220671.2020.1778614</a>                                                                             |
| Fernández-Rio, J., Cecchini, J. A., & Méndez-Giménez, A. (2017). Does Context, Practice or Competition Affect Female Athletes' Achievement Goal Dominance, Goal Pursuit, Burnout and Motivation? <i>Journal of Human Kinetics</i> , 59(1), 91–105. <a href="https://doi.org/10.1515/hukin-2017-0150">https://doi.org/10.1515/hukin-2017-0150</a>                                                                                             |



|                                                                                                                                                                                                                                                                                                                                                                                                                                                                                                                           |
|---------------------------------------------------------------------------------------------------------------------------------------------------------------------------------------------------------------------------------------------------------------------------------------------------------------------------------------------------------------------------------------------------------------------------------------------------------------------------------------------------------------------------|
| <p>Fernandez-Rio, J., Méndez-Giménez, A., &amp; Estrada, J. A. C. (2014). A cluster analysis on students' perceived motivational climate: Implications on psycho-social variables. <i>The Spanish Journal of Psychology</i>, 17.</p>                                                                                                                                                                                                                                                                                      |
| <p>Fernandez-Rio, J., Sanz, N., Fernandez-Cando, J., &amp; Santos, L. (2017). Impact of a sustained cooperative learning intervention on student motivation. <i>Physical Education and Sport Pedagogy</i>, 22(1), 89–105.</p>                                                                                                                                                                                                                                                                                             |
| <p>Fry, M. D., Hogue, C. M., Iwasaki, S., &amp; Solomon, G. B. (2021). The Relationship Between the Perceived Motivational Climate in Elite Collegiate Sport and Athlete Psychological Coping Skills. <i>Journal of Clinical Sport Psychology</i>, 15(4), 334–350. <a href="https://doi.org/10.1123/jcsp.2020-0002">https://doi.org/10.1123/jcsp.2020-0002</a></p>                                                                                                                                                        |
| <p>Fuster-Parra, P., García-Mas, A., Ponseti, F. J., Palou, P., &amp; Cruz, J. (2013). A Bayesian network to discover relationships between negative features in sport: a case study of teen players. <i>Quality &amp; Quantity</i>, 48(3), 1473–1491. <a href="https://doi.org/10.1007/s11135-013-9848-y">https://doi.org/10.1007/s11135-013-9848-y</a></p>                                                                                                                                                              |
| <p>García-Calvo, T., Leo, F. M., Gonzalez-Ponce, I., Sánchez-Miguel, P. A., Mouratidis, A., &amp; Ntoumanis, N. (2014). Perceived coach-created and peer-created motivational climates and their associations with team cohesion and athlete satisfaction: evidence from a longitudinal study. <i>Journal of Sports Sciences</i>, 32(18), 1738–1750. <a href="https://doi.org/10.1080/02640414.2014.918641">https://doi.org/10.1080/02640414.2014.918641</a></p>                                                          |
| <p>Garcia-Mas, A., Fuster-Parra, P., Ponseti, F. J., Palou, P., Olmedilla, A., &amp; Cruz, J. (2015). Análisis bayesiano de la motivación, el clima motivacional y la ansiedad en jóvenes jugadores de equipo = A Bayesian analysis of the motivation, motivational climate and anxiety in young competitive team players. <i>Anales de Psicología</i>, 31(1), 355–366. <a href="https://doi-org.lib-e2.lib.ttu.edu/10.6018/analesps.31.1.167531">https://doi-org.lib-e2.lib.ttu.edu/10.6018/analesps.31.1.167531</a></p> |
| <p>Garcia-Mas, A., Palou, P., Smith, R. E. ., Ponseti, X., Almeida, P., Lameiras, J., Jiménez, R., &amp; Leiva, A. (2011). Ansiedad competitiva y clima motivacional en jóvenes futbolistas de competición, en relación con las habilidades y el rendimiento percibido por sus entrenadores = Performance anxiety and motivational climate in young competitive soccer players in relation to performance and skills perceived by their coaches. <i>Revista de Psicología Del Deporte</i>, 20(1), 197–207.</p>            |
| <p>Gayman, A. M., Eys, M., &amp; Coleman, T. (2022). Group dynamics in Canadian recreational team sports later in life. <i>Psychology of Sport &amp; Exercise</i>, 60, N.PAG.</p>                                                                                                                                                                                                                                                                                                                                         |
| <p>Giannoudis, G., Digelidis, N., &amp; Papaioannou, A. (2009). The Motivation Climate and Perceived Sport Teachers' Behavior toward Disciplined - Undisciplined Students. <i>Inquiries in Sport &amp; Physical Education</i>, 7(1), 10–21.</p>                                                                                                                                                                                                                                                                           |

Gil-Arias, A., Claver, F., Práxedes, A., Villar, F. D., & Harvey, S. (2020). Autonomy support, motivational climate, enjoyment and perceived competence in physical education: Impact of a hybrid teaching games for understanding/sport education unit. *European Physical Education Review*, 26(1), 36–53.

Gillham, A., Burton, D., & Gillham, E. (2013). Going beyond Won-Loss Record to Identify Successful Coaches: Development and Preliminary Validation of the Coaching Success Questionnaire-2. *International Journal of Sports Science & Coaching*, 8(1), 115–138.  
<https://doi.org/10.1260/1747-9541.8.1.115>

Girard, S., Desbiens, J.-F., & Hogue, A.-M. (2023). Effects of a training course on creation of an empowering motivational climate in physical education: a quasi-experimental study. *Physical Education & Sport Pedagogy*, 28(1), 56–75.

Girard, S., Lemoyne, J., Blais, D., & St-Amand, J. (2022). An analysis of mechanisms underlying social goals in physical education: a comparison between ordinary and special classes. *Physical Education and Sport Pedagogy*, 27(3), 320–337. <https://doi.org/10.1080/17408989.2021.1879767>

Gjesdal, S., Haug, E. M., & Ommundsen, Y. (2019). A conditional process analysis of the coach-created mastery climate, task goal orientation, and competence satisfaction in youth soccer: The moderating role of controlling coach behavior. *Journal of Applied Sport Psychology*, 31(2), 203–217.  
<https://doi.org/10.1080/10413200.2017.1413690>

Gjesdal, S., Stenling, A., Solstad, B. E., & Ommundsen, Y. (2018). A study of coach-team perceptual distance concerning the coach-created motivational climate in youth sport. *Scandinavian Journal of Medicine & Science in Sports*, 29(1), 132–143. Portico.  
<https://doi.org/10.1111/sms.13306>

Goal Orientation and Perceptions of the Motivational Climate Initiated by Parents. (1996). *Pediatric Exercise Science*, 8(2), 122–129.

Gómez-López, M., Chicau Borrego, C., Marques da Silva, C., Granero-Gallegos, A., & González-Hernández, J. (2020). Effects of Motivational Climate on Fear of Failure and Anxiety in Teen Handball Players. *International Journal of Environmental Research and Public Health*, 17(2), 592.  
<https://doi.org/10.3390/ijerph17020592>

Gómez-López, M., Granero-Gallegos, A., Baena-Extremuera, A., Amador, C. B., & Pérez Quero, F. J. (2015). Efectos de Interacción de Sexo y Práctica de Ejercicio Físico sobre las Estrategias para la Disciplina, Motivación y Satisfacción con la Educación Física = Interaction effects of sex and practice of physical exercise on strategies for discipline, motivation and satisfaction with physical education. *Revista Iberoamericana de Diagnóstico y Evaluación Psicológica*, 40(2), 6–16.

- GONZÁLEZ-CALVO, G., BORES-GARCÍA, D., HORTIGÜELA-ALCALÁ, D., & BARBA-MARTÍN, R. A. (2018). Adherence to a Physical Exercise Program in School and Extracurricular Activities. / Adherència a un programa d'exercici físic en els àmbits educatius i extraescolar. *Apunts: Educació Física i Esports*, 134, 39–54.
- González-Calvo, G., Bores-García, D., Hortigüela-Alcalá, D., & Barba-Martín, R. A. (2018). Adherence to a Physical Exercise Program in School and Extracurricular Activities. / Adherència a un programa d'exercici físic en els àmbits educatius i extraescolar. Apunts: Educació Física i Esports, 134, 39–54.*
- González-Calvo, G., Bores-García, D., Hortigüela-Alcalá, D., & Barba-Martín, R. A. (2018). Adherència a un programa d'exercici físic en els àmbits educatius i extraescolar. *Apunts Educació Física i Esports*, 134, 39–54. [https://doi.org/10.5672/apunts.2014-0983.cat.\(2018/4\).134.03](https://doi.org/10.5672/apunts.2014-0983.cat.(2018/4).134.03)
- González-Cutre, D., & Sicilia, Á. (2012). Motivation and Exercise Dependence: A Study Based on Self-Determination Theory. *Research Quarterly for Exercise and Sport*, 83(2), 318–329. <https://doi.org/10.5641/027013612800745194>
- Gotzaridis, C., Papaioannou, A., Antoniou, P., & Albanidis, E. (2007). The Effect of an Interdisciplinary Teaching Approach on Seventh-Grade Pupils' Motivation in Physical Education Class. *Inquiries in Sport & Physical Education*, 5(1), 52–62.
- Granero-Gallegos, Antonio, Manuel Gómez-López, Nuria Rodríguez-Suárez, J. Arturo Abrales, Marianna Alesi, and Antonino Bianco. 2017. "Importance of the Motivational Climate in Goal, Enjoyment, and the Causes of Success in Handball Players." *Frontiers in Psychology* 8 (December). doi:10.3389/fpsyg.2017.02081.
- Gråstén, A., & Watt, A. (2017). A Motivational Model of Physical Education and Links to Enjoyment, Knowledge, Performance, Total Physical Activity and Body Mass Index. *Journal of Sports Science & Medicine*, 16(3), 318–327.
- Gråstén, A., Jaakkola, T., Liukkonen, J., Watt, A., & Yli-Piipari, S. (2012). Prediction of enjoyment in school physical education. *Journal of Sports Science & Medicine*, 11(2), 260–269.
- Gray, S., Sproule, J., & Morgan, K. (2009). Teaching team invasion games and motivational climate. / Der Unterricht in Mannschaftssportspielarten und das motivationale Klima. *European Physical Education Review*, 15(1), 65–89.
- Griffin, K., Meaney, K., & Hart, M. (2013). The Impact of a Mastery Motivational Climate on Obese and Overweight Children's Commitment to and Enjoyment of Physical Activity: A Pilot Study. *American Journal of Health Education*, 44(1), 1–8.
- Grove, J. R., & Weigland, D. A. (1999). Goal orientations and climate. *Journal of Sport & Exercise Psychology*, 21(3), 295.

|                                                                                                                                                                                                                                                                                                                                                                                                                                                                                                                                                                   |
|-------------------------------------------------------------------------------------------------------------------------------------------------------------------------------------------------------------------------------------------------------------------------------------------------------------------------------------------------------------------------------------------------------------------------------------------------------------------------------------------------------------------------------------------------------------------|
| Gu, X., & Solmon, M. A. (2016). Motivational processes in children's physical activity and health-related quality of life. <i>Physical Education and Sport Pedagogy</i> , 21(4), 407–424. <a href="https://doi.org/10.1080/17408989.2015.1017456">https://doi.org/10.1080/17408989.2015.1017456</a>                                                                                                                                                                                                                                                               |
| Gu, X., & Solmon, M. A. (2016). Motivational processes in children's physical activity and health-related quality of life. <i>Physical Education and Sport Pedagogy</i> , 21(4), 407–424. <a href="https://doi.org/10.1080/17408989.2015.1017456">https://doi.org/10.1080/17408989.2015.1017456</a>                                                                                                                                                                                                                                                               |
| Gustafsson, H., Hill, A. P., Stenling, A., & Wagnsson, S. (2015). Profiles of perfectionism, parental climate, and burnout among competitive junior athletes. <i>Scandinavian Journal of Medicine &amp; Science in Sports</i> , 26(10), 1256–1264. Portico. <a href="https://doi.org/10.1111/sms.12553">https://doi.org/10.1111/sms.12553</a>                                                                                                                                                                                                                     |
| Gutiérrez-García, P., Alejandra Herrera-Nevárez, M., Moueth-Cabrera, M. T., Andrés González-Fimbres, R., Ramírez-Siqueiros, M. G., & Castillo-Jiménez, N. (2023). Empoderamiento y desempoderamiento, satisfacción, frustración, motivación e intención futura de práctica en paralímpicos. Diferencias demográficas. / Empowering and disempowering, satisfaction, frustration, motivation and future intention to practice in Paralympians. Demographic differences. <i>Retos: Nuevas Perspectivas de Educación Física, Deporte y Recreación</i> , 49, 532–541. |
| Gutiérrez-García, P., López-Walle, J. M., Tomás, I., Tristán, J., & Balaguer, I. (2019). Relación entre clima empowering y diversión en pitchers de béisbol: el papel moderador de la motivación autónoma. <i>Cuadernos de Psicología Del Deporte</i> , 19(1), 166–177. <a href="https://doi.org/10.6018/cpd.353081">https://doi.org/10.6018/cpd.353081</a>                                                                                                                                                                                                       |
| Gutiérrez-García, P., López-Walle, J., Tomás, I., Tristán, J., & Balaguer, I. (2019). Relación entre clima empowering y diversión en pitchers de béisbol: el papel moderador de la motivación autónoma. / Relationship between empowering climate and enjoyment in baseball pitchers: the moderator role of autonomous motivation. <i>Cuadernos de Psicología Del Deporte</i> , 19(1), 166–177.                                                                                                                                                                   |
| Guzmán, J. F., & García, C. G. (2014). Psychological Well-Being in Dancers: A Social Cognitive Analysis. / Bienestar Psicológico en Bailarines: Un Análisis Social Cognitivo. <i>International Journal of Medicine &amp; Science of Physical Activity &amp; Sport / Revista Internacional de Medicina y Ciencias de La Actividad Física y Del Deporte</i> , 14(56), 687–704.                                                                                                                                                                                      |
| Habeeb, C. M., Barbee, J., & Raedeke, T. D. (2023). Association of parent, coach, and peer motivational climate with high school athlete burnout and engagement: Comparing mediation and moderation models. <i>Psychology of Sport and Exercise</i> , 68, 102471. <a href="https://doi.org/10.1016/j.psychsport.2023.102471">https://doi.org/10.1016/j.psychsport.2023.102471</a>                                                                                                                                                                                 |
| Halliburton, A. L., & Weiss, M. R. (2002). Sources of Competence Information and Perceived Motivational Climate among Adolescent Female Gymnasts Varying in Skill Level. <i>Journal of Sport and Exercise Psychology</i> , 24(4), 396–419. <a href="https://doi.org/10.1123/jsep.24.4.396">https://doi.org/10.1123/jsep.24.4.396</a>                                                                                                                                                                                                                              |

|                                                                                                                                                                                                                                                                                                                                                                                                               |
|---------------------------------------------------------------------------------------------------------------------------------------------------------------------------------------------------------------------------------------------------------------------------------------------------------------------------------------------------------------------------------------------------------------|
| <p>Hancox, J. E., Quested, E., Ntoumanis, N., &amp; Duda, J. L. (2017). Teacher-created social environment, basic psychological needs, and dancers' affective states during class: A diary study. <i>Personality and Individual Differences</i>, 115, 137–143. <a href="https://doi-org.lib-e2.lib.ttu.edu/10.1016/j.paid.2016.03.033">https://doi-org.lib-e2.lib.ttu.edu/10.1016/j.paid.2016.03.033</a></p>  |
| <p>Hancox, J. E., Quested, E., Ntoumanis, N., &amp; Duda, J. L. (2017). Teacher-created social environment, basic psychological needs, and dancers' affective states during class: A diary study. <i>Personality and Individual Differences</i>, 115, 137–143. <a href="https://doi-org.lib-e2.lib.ttu.edu/10.1016/j.paid.2016.03.033">https://doi-org.lib-e2.lib.ttu.edu/10.1016/j.paid.2016.03.033</a></p>  |
| <p>Haraldsen, H. M., Nordin-Bates, S. M., Abrahamsen, F. E., &amp; Halvari, H. (2020). Thriving, Striving, or Just Surviving? TD Learning Conditions, Motivational Processes and Well-Being Among Norwegian Elite Performers in Music, Ballet, and Sport. <i>Roeper Review</i>, 42(2), 109–125. <a href="https://doi.org/10.1080/02783193.2020.1728796">https://doi.org/10.1080/02783193.2020.1728796</a></p> |
| <p>Harris, B. S., Blom, L. C., &amp; Visek, A. J. (2013). Assessment in youth sport: Practical issues and best practice guidelines. <i>The Sport Psychologist</i>, 27(2), 201–211.</p>                                                                                                                                                                                                                        |
| <p>Harris, B. S., Blom, L. C., &amp; Visek, A. J. (2013). Assessment in youth sport: Practical issues and best practice guidelines. <i>The Sport Psychologist</i>, 27(2), 201–211. <a href="https://doi-org.lib-e2.lib.ttu.edu/10.1123/tsp.27.2.201">https://doi-org.lib-e2.lib.ttu.edu/10.1123/tsp.27.2.201</a></p>                                                                                          |
| <p>Harwood, C. G., Caglar, E., Thrower, S. N., &amp; Smith, J. M. J. (2019). Development and Validation of the Parent-Initiated Motivational Climate in Individual Sport Competition Questionnaire. <i>Frontiers in Psychology</i>, 10. <a href="https://doi.org/10.3389/fpsyg.2019.00128">https://doi.org/10.3389/fpsyg.2019.00128</a></p>                                                                   |
| <p>Harwood, C. G., Keegan, R. J., Smith, J. M. J., &amp; Raine, A. S. (2015). A systematic review of the intrapersonal correlates of motivational climate perceptions in sport and physical activity. <i>Psychology of Sport &amp; Exercise</i>, 18, 9–25.</p>                                                                                                                                                |
| <p>Haugen, T., Riesen, J. F., Østrem, K., Høigaard, R., &amp; Erikstad, M. K. (2020). The Relationship between Motivational Climate and Personal Treatment Satisfaction among Young Soccer Players in Norway: The Moderating Role of Supportive Coach-Behaviour. <i>Sports</i>, 8(12), 162. <a href="https://doi.org/10.3390/sports8120162">https://doi.org/10.3390/sports8120162</a></p>                     |
| <p>Hill, D. M., &amp; Shaw, G. (2013). A qualitative examination of choking under pressure in team sport. <i>Psychology of Sport &amp; Exercise</i>, 14(1), 103–110.</p>                                                                                                                                                                                                                                      |
| <p>Hodge, K., &amp; Gucciardi, D. F. (2015). Antisocial and Prosocial Behavior in Sport: The Role of Motivational Climate, Basic Psychological Needs, and Moral Disengagement. <i>Journal of Sport and Exercise Psychology</i>, 37(3), 257–273. <a href="https://doi.org/10.1123/jsep.2014-0225">https://doi.org/10.1123/jsep.2014-0225</a></p>                                                               |

- Hogue, C. M. (2020). Achievement goal theory-based psychological skills training session buffers youth athletes' psychophysiological responses to performance stress. *Psychology of Sport and Exercise*, 51, 101792. <https://doi.org/10.1016/j.psychsport.2020.101792>
- Hogue, C. M. (2020). Achievement goal theory-based psychological skills training session buffers youth athletes' psychophysiological responses to performance stress. *Psychology of Sport and Exercise*, 51. <https://doi-org.lib-e2.lib.ttu.edu/10.1016/j.psychsport.2020.101792>
- Hogue, C. M., Fry, M. D., & Fry, A. C. (2017). The differential impact of motivational climate on adolescents' psychological and physiological stress responses. *Psychology of Sport and Exercise*, 30, 118–127. <https://doi.org/10.1016/j.psychsport.2017.02.004>
- Hogue, C. M., Fry, M. D., & Fry, A. C. (2021). The protective impact of learning to juggle in a caring, task-involving climate versus an ego-involving climate on participants' inflammation, cortisol, and psychological responses. *International Journal of Sport and Exercise Psychology*, 19(4), 650–667. <https://doi.org/10.1080/1612197x.2019.1696868>
- Hogue, C. M., Fry, M. D., & Iwasaki, S. (2019). The impact of the perceived motivational climate in physical education classes on adolescent greater life stress, coping appraisals, and experience of shame. *Sport, Exercise, and Performance Psychology*, 8(3), 273–289. <https://doi.org/10.1037/spy0000153>
- Hogue, C. M., Fry, M. D., Fry, A. C., & Pressman, S. D. (2013). The Influence of a Motivational Climate Intervention on Participants' Salivary Cortisol and Psychological Responses. *Journal of Sport & Exercise Psychology*, 35(1), 85–97.
- Hogue, C. M., Fry, M. D., Fry, A. C., & Pressman, S. D. (2013). The Influence of a Motivational Climate Intervention on Participants' Salivary Cortisol and Psychological Responses. *Journal of Sport & Exercise Psychology*, 35(1), 85–97.
- Holgado, F. P., Navas, L., & López-Núñez, M. (2010). Orientaciones de Meta en el deporte: un modelo causal. *European Journal of Education and Psychology*, 3(1), 19. <https://doi.org/10.30552/ejep.v3i1.50>
- Horn, T. S. (2015). Social Psychological and Developmental Perspectives on Early Sport Specialization. *Kinesiology Review*, 4(3), 248–266.
- Hortiguera, D., Gutierrez-Garcia, C., & Hernando-Garijo, A. (2017). Combat versus team sports: the effects of gender in a climate of peer-motivation, and levels of fun and violence in physical education students. / Sporty walki kontra sporty zespołowe: wpływ płci na atmosferę motywacji, zabawy i przemocy wśród uczniów-rówieśników w trakcie zajęć wychowania fizycznego. Ido Movement for Culture. *Journal of Martial Arts Anthropology*, 17(3), 11–20.

- Howell, M., Hwang, Y., Deng, Y., Kim, T., Walker, B., & Yli-Piipari, S. (2021). Associations Of Coach-created Motivational Climate And The Prevalence Of Anxiety In Student-athletes. *Medicine & Science in Sports & Exercise*, 53(8S), 310–310. <https://doi.org/10.1249/01.mss.0000762752.02687.02>
- Huddleston, H., Fry, M. D., & Brown, T. C. (2012). Corporate fitness members' perceptions of the environment and their intrinsic motivation. *Revista de Psicología Del Deporte*, 21(1), 15–23.
- Into, S., Perttula, V.-M., Aunola, K., Sorkkila, M., & Ryba, T. V. (2020). Relationship between coaching climates and student-athletes' symptoms of burnout in school and sports. *Sport, Exercise, and Performance Psychology*, 9(3), 341–356. <https://doi.org/10.1037/spy0000180>
- Isoard-Gauthier, S., Ginoux, C., & Trouilloud, D. (2022). Associations between peer motivational climate and athletes' sport-related well-being: Examining the mediating role of motivation using a multi-level approach. *Journal of Sports Sciences*, 40(5), 550–560. <https://doi.org/10.1080/02640414.2021.2004680>
- Isoard-Gauthier, S., Guillet-Descas, E., & Duda, J. L. (2013). How to achieve in elite training centers without burning out? An achievement goal theory perspective. *Psychology of Sport and Exercise*, 14(1), 72–83. <https://doi.org/10.1016/j.psychsport.2012.08.001>
- JAANKOLA, T., BARKOUKIS, V., HUHTINIEMI, M., SALIN, K., SEPPÄLÄ, S., LAHTI, J., & WATT, A. (2019). Enjoyment and anxiety in Finnish physical education - achievement goals and self-determination perspectives. *Journal of Physical Education & Sport*, 19(3), 1619–1629.
- Jaakkola, T., Ntoumanis, N., & Liukkonen, J. (2015). Motivational climate, goal orientation, perceived sport ability, and enjoyment within Finnish junior ice hockey players. *Scandinavian Journal of Medicine & Science in Sports*, 26(1), 109–115. Portico. <https://doi.org/10.1111/sms.12410>
- Jaakkola, T., Wang, C. K. J., Soini, M., & Liukkonen, J. (2015). Students' Perceptions of Motivational Climate and Enjoyment in Finnish Physical Education: A Latent Profile Analysis. *Journal of Sports Science & Medicine*, 14(3), 477–483.
- Jaakkola, T., Yli-Piipari, S., Barkoukis, V., & Liukkonen, J. (2015). Relationships among perceived motivational climate, motivational regulations, enjoyment, and PA participation among Finnish physical education students. *International Journal of Sport and Exercise Psychology*, 15(3), 273–290. <https://doi.org/10.1080/1612197x.2015.1100209>
- Jaakkola, T., Yli-Piipari, S., Barkoukis, V., & Liukkonen, J. (2017). Relationships among perceived motivational climate, motivational regulations, enjoyment, and PA participation among Finnish physical education students. *International Journal of Sport & Exercise Psychology*, 15(3), 273–290.

|                                                                                                                                                                                                                                                                                                                                                                                                                                                                       |
|-----------------------------------------------------------------------------------------------------------------------------------------------------------------------------------------------------------------------------------------------------------------------------------------------------------------------------------------------------------------------------------------------------------------------------------------------------------------------|
| Jakobek, V., & Ljubotina, D. (2022). Povezanost ponašanja trenera, motivacijske klime i intrinzične motivacije kod mladih nogometaša. <i>Psihologijske Teme</i> , 31(2), 235–258. <a href="https://doi.org/10.31820/pt.31.2.2">https://doi.org/10.31820/pt.31.2.2</a>                                                                                                                                                                                                 |
| Jerez, P., & Cabrera-Fernández, A. (2021). Clima Motivacional Percibido en El Deporte Y Su Asociación Con Los Niveles De Resiliencia en Estudiantes Universitarios. / Perceived Motivational Climate in Sport and Its Association with Resilience Levels in Undergraduate Students. <i>Journal of Sport &amp; Health Research</i> , 13(3), 505–514.                                                                                                                   |
| Jõesaar, H., & Hein, V. (2011). Psychosocial Determinants of Young Athletes' Continued Participation over Time. Perceptual and Motor Skills, 113(1), 51–66. <a href="https://doi.org/10.2466/05.06.13.pms.113.4.51-66">https://doi.org/10.2466/05.06.13.pms.113.4.51-66</a>                                                                                                                                                                                           |
| Jõesaar, H., Hein, V., & Hagger, M. S. (2011). Peer influence on young athletes' need satisfaction, intrinsic motivation and persistence in sport: A 12-month prospective study. <i>Psychology of Sport and Exercise</i> , 12(5), 500–508. <a href="https://doi.org/10.1016/j.psychsport.2011.04.005">https://doi.org/10.1016/j.psychsport.2011.04.005</a>                                                                                                            |
| Johnson, C. E., Erwin, H. E., Kipp, L., & Beighle, A. (2017). Student Perceived Motivational Climate, Enjoyment, and Physical Activity in Middle School Physical Education. <i>Journal of Teaching in Physical Education</i> , 36(4), 398–408.                                                                                                                                                                                                                        |
| Kaprinis, S., Digelidis, N., & Papaioannou, A. (2009). Physical Education and Math: An Interdisciplinary Teaching Approach. <i>Inquiries in Sport &amp; Physical Education</i> , 7(2), 90–102.                                                                                                                                                                                                                                                                        |
| Karagiannidis, Y., Barkoukis, V., Gourgoulis, V., Kosta, G., & Antoniou, P. (2015). The role of motivation and metacognition on the development of cognitive and affective responses in physical education lessons: A self-determination approach. / O papel da motivação e metacognição no desenvolvimento das respostas afetiva e cognitiva em aulas de educação física: uma abordagem centrada na teoria da autodeterminação. <i>Motricidade</i> , 11(1), 135–150. |
| Kavussanu, M., & Roberts, G. C. (1996). Motivation in physical activity contexts: The relationship of perceived motivational climate to intrinsic motivation and self-efficacy. <i>Journal of Sport &amp; Exercise Psychology</i> , 18(3), 264–280.                                                                                                                                                                                                                   |
| Kavussanu, M., White, S. A., Jowett, S., & England, S. (2011). Elite and non-elite male footballers differ in goal orientation and perceptions of parental climate. <i>International Journal of Sport &amp; Exercise Psychology</i> , 9(3), 284–290.                                                                                                                                                                                                                  |
| Kelso, A., Linder, S., Reimers, A. K., Klug, S. J., Alesi, M., Scifo, L., Borrego, C. C., Monteiro, D., & Demetriou, Y. (2020). Effects of school-based interventions on motivation towards physical activity in children and adolescents: A systematic review and meta-analysis. <i>Psychology of Sport and Exercise</i> , 51.                                                                                                                                       |



|                                                                                                                                                                                                                                                                                                                                                                   |
|-------------------------------------------------------------------------------------------------------------------------------------------------------------------------------------------------------------------------------------------------------------------------------------------------------------------------------------------------------------------|
| Kingston, K., Wixey, D. J., & Morgan, K. (2020). Monitoring the Climate: Exploring the Psychological Environment in an Elite Soccer Academy. <i>Journal of Applied Sport Psychology</i> , 32(3), 297–314. <a href="https://doi.org/10.1080/10413200.2018.1481466">https://doi.org/10.1080/10413200.2018.1481466</a>                                               |
| Kipp, L. E., & Bolter, N. D. (2020). Motivational climate, psychological needs, and personal and social responsibility in youth soccer: Comparisons by age group and competitive level. <i>Psychology of Sport and Exercise</i> , 51, 101756. <a href="https://doi.org/10.1016/j.psychsport.2020.101756">https://doi.org/10.1016/j.psychsport.2020.101756</a>     |
| Kipp, L. E., & Weiss, M. R. (2013). Social influences, psychological need satisfaction, and well-being among female adolescent gymnasts. <i>Sport, Exercise, and Performance Psychology</i> , 2(1), 62–75. <a href="https://doi.org/10.1037/a0030236">https://doi.org/10.1037/a0030236</a>                                                                        |
| Kipp, L. E., & Weiss, M. R. (2015). Social predictors of psychological need satisfaction and well-being among female adolescent gymnasts: A longitudinal analysis. <i>Sport, Exercise, and Performance Psychology</i> , 4(3), 153–169. <a href="https://doi.org/10.1037/spy0000033">https://doi.org/10.1037/spy0000033</a>                                        |
| Kipp, L. E., Bolter, N. D., & Phillips Richter, A. (2019). Motivational Climate Profiles, Pubertal Status, and Well-Being Among Female Adolescent Aesthetic Sport Athletes. <i>Pediatric Exercise Science</i> , 31(4), 458–464. <a href="https://doi.org/10.1123/pes.2018-0182">https://doi.org/10.1123/pes.2018-0182</a>                                         |
| Kipp, L., & Amorose, A. J. (2008). Perceived Motivational Climate and Self-Determined Motivation in Female High School Athletes. <i>Journal of Sport Behavior</i> , 31(2), 108–129.                                                                                                                                                                               |
| KOLAYIŞ, H., ÇELİK, N., & NARİN, M. (2019). GENÇ YÜZÜCÜLERİN EBEVEYN GÜDÜSEL İKLİMİ İLE SPORA KATILIM MOTİVASYONLARI ARASINDAKİ İLİŞKİNİN İNCELENMESİ. / Examining the Relationship between Parent-Initiated Motivational Climate and Sport Participation Motivation of Young Swimmers. <i>Congress Papers of The Association of Sports Sciences</i> , 1321–1322. |
| Kolayış, H., Çelik, N., & Narin, M. (2019). GENÇ YÜZÜCÜLERİN EBEVEYN GÜDÜSEL İKLİMİ İLE SPORA KATILIM MOTİVASYONLARI ARASINDAKİ İLİŞKİNİN İNCELENMESİ. / Examining the Relationship between Parent-Initiated Motivational Climate and Sport Participation Motivation of Young Swimmers. <i>Congress Papers of The Association of Sports Sciences</i> , 1321–1322. |
| Kolayış, H., Sarı, İ., & Çelik, N. (2017). Parent-Initiated Motivational Climate and Selfdetermined Motivation in Youth Sport: How Should Parents Behave to Keep Their Child in Sport? <i>Kinesiology</i> , 49(2), 217–224.                                                                                                                                       |
| Kristiansen, E., & Roberts, G. C. (2011). Media exposure and adaptive coping in elite football. <i>International Journal of Sport Psychology</i> , 42(4), 339–367.                                                                                                                                                                                                |

|                                                                                                                                                                                                                                                                                                                                                                                                                                            |
|--------------------------------------------------------------------------------------------------------------------------------------------------------------------------------------------------------------------------------------------------------------------------------------------------------------------------------------------------------------------------------------------------------------------------------------------|
| <p>Krommidas, C., Papaioannou, A. G., Comoutos, N., Kouali, D., Galanis, E., &amp; Chroni, S. "Ani." (2022). Effects of parental support and coach-initiated motivational climate on young athletes' psychosocial behaviors and well-being. <i>Asian Journal of Sport and Exercise Psychology</i>, 2(3), 140–150. <a href="https://doi.org/10.1016/j.ajsep.2022.06.002">https://doi.org/10.1016/j.ajsep.2022.06.002</a></p>                |
| <p>Kroshus, E., &amp; DeFreese, J. D. (2017). Athlete Burnout Prevention Strategies Used by U.S. Collegiate Soccer Coaches. <i>The Sport Psychologist</i>, 31(4), 332–343. <a href="https://doi.org/10.1123/tsp.2016-0067">https://doi.org/10.1123/tsp.2016-0067</a></p>                                                                                                                                                                   |
| <p>Kuczek, P. (2013). On the Possibility of Applying Achievement Goal Theory in Competitive Sports. <i>Human Movement</i>, 14(2). <a href="https://doi.org/10.2478/humo-2013-0015">https://doi.org/10.2478/humo-2013-0015</a></p>                                                                                                                                                                                                          |
| <p>Langan, E., Blake, C., &amp; Lonsdale, C. (2013). Systematic review of the effectiveness of interpersonal coach education interventions on athlete outcomes. <i>Psychology of Sport and Exercise</i>, 14(1), 37–49. <a href="https://doi-org.lib-e2.lib.ttu.edu/10.1016/j.psychsport.2012.06.007">https://doi-org.lib-e2.lib.ttu.edu/10.1016/j.psychsport.2012.06.007</a></p>                                                           |
| <p>Legg, E., Newland, A., &amp; Bigelow, R. (2018). Somebody's Eyes are Watching: The Impact of Coaching Observations on Empowering Motivational Climates and Positive Youth Development. <i>Journal of Park and Recreation Administration</i>, 36(4), 90–106. <a href="https://doi.org/10.18666/jpra-2018-v36-i4-8885">https://doi.org/10.18666/jpra-2018-v36-i4-8885</a></p>                                                             |
| <p>Lemyre, P. -N., Hall, H. K., &amp; Roberts, G. C. (2008). A social cognitive approach to burnout in elite athletes. <i>Scandinavian Journal of Medicine &amp; Science in Sports</i>, 18(2), 221–234. Portico. <a href="https://doi.org/10.1111/j.1600-0838.2007.00671.x">https://doi.org/10.1111/j.1600-0838.2007.00671.x</a></p>                                                                                                       |
| <p>Lirgg, C. D., Gorman, D. R., Merrie, M. D., &amp; Hadadi, A. A. (2022). Motivational Climate, Basic Psychological Needs, and Students' Self-Talk in Physical Education. <i>Physical Educator</i>, 79(3), 280–304.</p>                                                                                                                                                                                                                   |
| <p>Liukkonen, J., Barkoukis, V., Watt, A., &amp; Jaakkola, T. (2010). Motivational Climate and Students' Emotional Experiences and Effort in Physical Education. <i>Journal of Educational Research</i>, 103(5), 295–308. <a href="https://doi-org.lib-e2.lib.ttu.edu/10.1080/00220670903383044">https://doi-org.lib-e2.lib.ttu.edu/10.1080/00220670903383044</a></p>                                                                      |
| <p>López, J. C., Álvarez, E. F., Pérez-Tejero, J., &amp; Molinuevo, J. S. (2013). Clima motivacional, competencia percibida, compromiso y ansiedad en Educación Física Diferencias en función de la obligatoriedad de la enseñanza = Motivational climate, perceived competence, commitment and anxiety in physical education Differences by compulsory nature of education. <i>Revista de Psicología Del Deporte</i>, 22(1), 151–157.</p> |
| <p>Luckwu, R. M., &amp; Guzmán, J. F. (2011). Deportividad en balonmano: Un análisis desde la Teoría de la Autodeterminación = Sportsmanship in handball: An analysis based on the self-determination theory. <i>Revista de Psicología Del Deporte</i>, 20(2), 305–320.</p>                                                                                                                                                                |

- Lukwu, R. M., & Guzmán Luján, J. F. (2011). Sport commitment and adherence: A social-cognitive analysis. RICYDE. Revista Internacional de Ciencias Del Deporte / The International Journal of Sport Science, 7(25), 277–286. <https://doi-org.lib-e2.lib.ttu.edu/10.5232/ricyde2011.02503>
- Lundqvist, C., & Raglin, J. S. (2015). The relationship of basic need satisfaction, motivational climate and personality to well-being and stress patterns among elite athletes: An explorative study. *Motivation and Emotion*, 39(2), 237–246. <https://doi.org/10.1007/s11031-014-9444-z>
- Lung Hung Chen, Ying-Mei Tsai, & Ying Hwa Kee. (2007). The interaction of goal orientation and motivational climate in predicting athlete burnout. *Journal of Sport & Exercise Psychology*, 29, S151–S152.
- MacDonald, D. J., Côté, J., Eys, M., & Deakin, J. (2011). The Role of Enjoyment and Motivational Climate in Relation to the Personal Development of Team Sport Athletes. *The Sport Psychologist*, 25(1), 32–46. <https://doi.org/10.1123/tsp.25.1.32>
- Mastagli, M., Van Hoya, A., Hainaut, J.-P., & Bolmont, B. (2022). The role of an empowering motivational climate on pupils' concentration and distraction in physical education. *Journal of Teaching in Physical Education*, 41(2), 311–321. <https://doi.org/10.1123/jtpe.2020-0252>
- Mavropoulou, A., Barkoukis, V., Douka, S., Alexandris, K., & Hatzimanouil, D. (2019). The role of autonomy supportive activities on students' motivation and beliefs toward out-of-school activities. *Journal of Educational Research*, 112(2), 223–233.
- McCleery, J., Tereschenko, I., Li, L., & Copeland, N. (2023). Gender Differences in Coaching Behaviors Supportive of Positive Youth Sports Experience. *Women in Sport and Physical Activity Journal*, 31(2), 63–72. <https://doi.org/10.1123/wspaj.2022-0024>
- Meaney, K. S., & Kopf, K. (2010). CPR: Promoting Cooperation, Participation and Respect in Physical Education. *Strategies* (08924562), 24(2), 29–32.
- Melguizo-Ibáñez, E., González-Valero, G., Badicu, G., Saemi, E., & Puertas-Molero, P. (2023). Motivational Climate Effect on the Development of Anxiety and Body Image in Education Students: A Structural Equation Model. *Perspectives in Psychiatric Care*, 1–9. <https://doi-org.lib-e2.lib.ttu.edu/10.1155/2023/2613717>
- Melguizo-Ibáñez, E., Zurita-Ortega, F., Ubago-Jiménez, J. L., López-Gutiérrez, C. J., & González-Valero, G. (2022). *An explanatory model of the relationships between sport motivation, anxiety and physical and social self-concept in educational sciences students. Current Psychology: A Journal for Diverse Perspectives on Diverse Psychological Issues.* <https://doi-org.lib-e2.lib.ttu.edu/10.1007/s12144-022-02778-9>

Miller, S., & Fry, M. (2018). *Relationship Between Motivational Climate to Body Esteem and Social Physique Anxiety Within College Physical Activity Classes*. *Journal of Clinical Sport Psychology*, 12(4), 525–543.

MONTEIRO, D., PELLETIER, L. G., MOUTÃO, J., & CID, L. (2018). Examining the motivational determinants of enjoyment and the intention to continue of persistent competitive swimmers. *International Journal of Sport Psychology*, 49(6), 484–504.

MONTEIRO, D., PELLETIER, L. G., MOUTÃO, J., & CID, L. (2018). Examining the motivational determinants of enjoyment and the intention to continue of persistent competitive swimmers. *International Journal of Sport Psychology*, 49(6), 484–504.

Monteiro, D., Teixeira, D. S., Travassos, B., Duarte-Mendes, P., Moutão, J., Machado, S., & Cid, L. (2018). Perceived Effort in Football Athletes: The Role of Achievement Goal Theory and Self-Determination Theory. *Frontiers in Psychology*, 9. <https://doi.org/10.3389/fpsyg.2018.01575>

Moore, E. W. G., & Fry, M. D. (2017). National franchise members' perceptions of the exercise psychosocial environment, ownership, and satisfaction. *Sport, Exercise, and Performance Psychology*, 6(2), 188–198.

Moore, E. W. G., & Weiller-Abels, K. (2020). Psychosocial Climates Differentially Predict 12- to 14-Year-Old Competitive Soccer Players' Goal Orientations. *Women in Sport & Physical Activity Journal*, 28(2), 111–118.

Mora, À., Sousa, C., & Cruz, J. (2014). El clima motivacional, la autoestima y la ansiedad en jugadores jóvenes de un club de baloncesto. *Apunts Educació Física i Esports*, 117, 43–50. [https://doi.org/10.5672/apunts.2014-0983.es.\(2014/3\).117.04](https://doi.org/10.5672/apunts.2014-0983.es.(2014/3).117.04)

Morales-Belando, M. T., Côté, J., & Arias-Estero, J. L. (2021). A longitudinal examination of the influence of winning or losing with motivational climate as a mediator on enjoyment, perceived competence, and intention to be physically active in youth basketball. *Physical Education and Sport Pedagogy*, 28(5), 568–581. <https://doi.org/10.1080/17408989.2021.2006620>

Morela, E., Hatzigeorgiadis, A., Sanchez, X., Papaioannou, A., & Elbe, A.-M. (2017). Empowering youth sport and acculturation: Examining the hosts' perspective in Greek adolescents. *Psychology of Sport and Exercise*, 30, 226–235. <https://doi.org/10.1016/j.psychsport.2017.03.007>

Morela, E., Hatzigeorgiadis, A., Theodorakis, Y., Goudas, M., & Elbe, A. (2021). Youth sport motivational climate and attitudes toward migrants' acculturation: The role of empathy and altruism. *Journal of Applied Social Psychology*, 51(1), 32–41. <https://doi.org/10.1111/jasp.12713>

Moreno Luque, M., Reigal Garrido, R. E., Morillo Baro, J. P., Morales Sánchez, V., & Hernández Mendo, A. (2019). Estilo de interacción del entrenador, clima motivacional percibido y satisfacción de las necesidades psicológicas básicas en futbolistas jóvenes. *Cuadernos de Psicología Del Deporte*, 19(3), 79–89. <https://doi.org/10.6018/cpd.372381>

Moreno Luque, M., Reigal Garrido, R. E., Morillo Baro, J. P., Morales Sánchez, V., & Hernández Mendo, A. (2019). Estilo de interacción del entrenador, clima motivacional percibido y satisfacción de las necesidades psicológicas básicas en futbolistas jóvenes. *Cuadernos de Psicología Del Deporte*, 19(3), 79–89. <https://doi.org/10.6018/cpd.372381>

Moreno Murcia, J. A. (2005). Goal Orientations, Motivational Climate, Discipline and Physical Self-Perception Related to the Teacher's Gender, Satisfaction and Sport Activity of a Sample of Spanish Adolescent Physical Education Students. *International Journal of Applied Sports Sciences*, 17(2), 44–58.

Moreno-Murcia, J. A., & Hernández, E. H. (2019). Effect of a teaching intervention on motivation, enjoyment, and importance given to physical education. *Motricidade*, 15(2–3), 21–31.

Morgan, K., & Carpenter, P. (2002). Effects of manipulating the motivational climate in physical education lessons. / Die Auswirkung der Manipulation des motivationalen Klimas in Sportunterrichtsstunden. *European Physical Education Review*, 8(3), 207–229.

Morris, R., & Kavussanu, M. (2008). Antecedents of approach-avoidance goals in sport. *Journal of Sports Sciences*, 26(5), 465–476.

Mosqueda, S., López-Walle, J. M., Gutiérrez-García, P., García-Verazaluce, J., & Tristán, J. (2019). Autonomous Motivation as a Mediator Between an Empowering Climate and Enjoyment in Male Volleyball Players. *Sports*, 7(6), 153. <https://doi.org/10.3390/sports7060153>

Mosqueda, S., Ramírez, J. J., Tomás, I., Reynaga-Estrada, P., Vanegas-Farfano, M., & López-Walle, J. M. (2022). Climas empowering y disempowering, necesidades psicológicas e intención de práctica deportiva futura en jóvenes deportistas. *Revista Latinoamericana de Psicología*, 54. <https://doi.org/10.14349/rlp.2022.v54.7>

Mosqueda, S., Ródenas-Cuenca, L. T., Balaguer, I., Salcido Otañez, Y. E., & López-Walle, J. M. (2021). Diferencias demográficas de climas motivacionales, necesidades psicológicas básicas y cohesión en jóvenes (Demographic differences in motivational climates, basic psychological needs and cohesion in young people). *Retos*, 43, 613–622. <https://doi.org/10.47197/retos.v43i0.88608>

Mudrak, J., Slepicka, P., Slepickova, I., Zabrodská, K., & Knoblochova, M. (2021). Motivational beliefs and subjective effort in adolescent athletes. *International Journal of Sport Psychology*, 52(4), 335–354.

- Murcia, J. A. M., de San Román, M. L., Galindo, C. M., Alonso, N., & González-Cutre, D. (2008). Peers' influence on exercise enjoyment: A self-determination theory approach. *Journal of Sports Science & Medicine*, 7(1), 23–31.
- Nerstad, C. G. L., Caniëls, M. C. J., Roberts, G. C., & Richardsen, A. M. (2020). Perceived motivational climates and employee energy: The mediating role of basic psychological needs. *Frontiers in Psychology*, 11. <https://doi.org/10.3389/fpsyg.2020.01509>
- Nerstad, C. G. L., Richardsen, A. M., & Roberts, G. C. (2018). Who are the high achievers at work? Perceived motivational climate, goal orientation profiles, and work performance. *Scandinavian Journal of Psychology*, 59(6), 661–677.
- Nerstad, C. G. L., Richardsen, A. M., & Roberts, G. C. (2018). Who are the high achievers at work? Perceived motivational climate, goal orientation profiles, and work performance. *Scandinavian Journal of Psychology*, 59(6), 661–677. Portico. <https://doi.org/10.1111/sjop.12490>
- Newton, M., & Duda, J. L. (1999). The interaction of motivational climate, dispositional goal orientations, and perceived ability in predicting indices of motivation. / Interaction du climat de motivation, des buts poursuivis et des capacités perçues dans la prédiction des indices de motivation. *International Journal of Sport Psychology*, 30(1), 63–82.
- Newton, M., Duda, J. L., & Yin, Z. (2000). Examination of the psychometric properties of the Perceived Motivational Climate in Sport Questionnaire - 2 in a sample of female athletes. *Journal of Sports Sciences*, 18(4), 275–290. <https://doi.org/10.1080/026404100365018>
- Newton, M., Watson, D. L., Gano-Overway, L., Fry, M., Kim, M.-S., & Magyar, M. (2007). The Role of a Caring-Based Intervention in a Physical Activity Setting. *The Urban Review*, 39(3), 281–299. <https://doi.org/10.1007/s11256-007-0065-7>
- Nicholls, A. R., Morley, D., & Perry, J. L. (2016). The Model of Motivational Dynamics in Sport: Resistance to Peer Influence, Behavioral Engagement and Disaffection, Dispositional Coping, and Resilience. *Frontiers in Psychology*, 6. <https://doi.org/10.3389/fpsyg.2015.02010>
- Nordin-Bates, S. M., Quested, E., Walker, I. J., & Redding, E. (2012). Climate change in the dance studio: Findings from the UK centres for advanced training. *Sport, Exercise, and Performance Psychology*, 1(1), 3–16. <https://doi.org/10.1037/a0025316>
- Ntoumanis, N. (2005). A Prospective Study of Participation in Optional School Physical Education Using a Self-Determination Theory Framework. *Journal of Educational Psychology*, 97(3), 444–453. <https://doi.org/10.1037/0022-0663.97.3.444>
- Ntoumanis, N., & Biddle, S. (1998). The relationship between competitive anxiety, achievement goals, and motivational climates. / La relation entre l' anxiété de la compétition, la fixation des objectifs et le climat motivationnel. *Research Quarterly for Exercise & Sport*, 69(2), 176–187.

Ntoumanis, N., Pensgaard, A.-M., Martin, C., & Pipe, K. (2004). An Idiographic Analysis of Amotivation in Compulsory School Physical Education. *Journal of Sport & Exercise Psychology*, 26(2), 197–214.

Ntoumanis, N., Taylor, I. M., & Thøgersen-Ntoumani, C. (2012). A longitudinal examination of coach and peer motivational climates in youth sport: Implications for moral attitudes, well-being, and behavioral investment. *Developmental Psychology*, 48(1), 213–223.  
<https://doi.org/10.1037/a0024934>

Núñez, J. L., León, J., González, V., & Martín-Albo, J. (2011). Propuesta de un modelo explicativo del bienestar psicológico en el contexto deportivo = A proposal for an explanatory model of psychological well-being within the context of sport. *Revista de Psicología Del Deporte*, 20(1), 223–242.

O'Rourke, D. J., Smith, R. E., Punt, S., Coppel, D. B., & Breiger, D. (2017). Psychosocial correlates of young athletes' self-reported concussion symptoms during the course of recovery. *Sport, Exercise, and Performance Psychology*, 6(3), 262–276. <https://doi.org/10.1037/spy0000097>

O'Rourke, D. J., Smith, R. E., Smoll, F. L., & Cumming, S. P. (2011). Trait Anxiety in Young Athletes as a Function of Parental Pressure and Motivational Climate: Is Parental Pressure Always Harmful? *Journal of Applied Sport Psychology*, 23(4), 398–412.  
<https://doi.org/10.1080/10413200.2011.552089>

O'Rourke, D. J., Smith, R. E., Smoll, F. L., & Cumming, S. P. (2014). Relations of Parent- and Coach-Initiated Motivational Climates to Young Athletes' Self-Esteem, Performance Anxiety, and Autonomous Motivation: Who Is More Influential? *Journal of Applied Sport Psychology*, 26(4), 395–408. <https://doi.org/10.1080/10413200.2014.907838>

Ohlert, J., Schmitz, H., Schäfer-Pels, A., & Allroggen, M. (2022). An Empowering Climate as a Protective Factor against Sexual Violence in Sport? *Social Sciences*, 11(8), 330. <https://doi.org/10.3390/socsci11080330>

Ommundsen, Y., & Kvalø, S. E. (2007). Autonomy-Mastery, Supportive or Performance Focused? Different teacher behaviours and pupils' outcomes in physical education. *Scandinavian Journal of Educational Research*, 51(4), 385–413.

Ommundsen, Y., & Roberts, G. C. (1999). Effect of motivational climate profiles on motivational indices in team sport. *Scandinavian Journal of Medicine & Science in Sports*, 9(6), 389.

OMMUNDSEN, Y., LEMYRE, P.-N., ABRAHAMSEN, F., & ROBERTS, G. C. (2010). Motivational climate, need satisfaction, regulation of motivation and subjective vitality A study of young soccer players. *International Journal of Sport Psychology*, 41(3), 216–242.

- Ommundsen, Y., Roberts, G. C., & Kavussanu, M. (1998). Perceived motivational climate and cognitive and affective correlates among Norwegian athletes. *Journal of Sports Sciences*, 16(2), 153–164. <https://doi.org/10.1080/026404198366867>
- Omrčen, D. (2013). Knowledge production in kinesiology as viewed through the titles of papers published in an academic journal - A linguistic approach. *Kinesiology*, 45(1), 107–120.
- Ortega, F. Z., Zafra Santos, E. O., Moral, P. V., Fernández, S. R., Sánchez, M. C., & Muros Molina, J. J. (2017). Análisis de la resiliencia, autoconcepto y motivación en judo según el género = Analysis of resilience, self-concept and motivation in judo as gender. *Revista de Psicología Del Deporte*, 26(1), 71–81.
- Pacewicz, C. E., Smith, A. L., & Raedeke, T. D. (2020). Group cohesion and relatedness as predictors of self-determined motivation and burnout in adolescent female athletes. *Psychology of Sport and Exercise*, 50, 101709. <https://doi.org/10.1016/j.psychsport.2020.101709>
- Papaioannou, A. G., Ampatzoglou, G., Kalogiannis, P., & Sagovits, A. (2008). Social agents, achievement goals, satisfaction and academic achievement in youth sport. *Psychology of Sport and Exercise*, 9(2), 122–141. <https://doi.org/10.1016/j.psychsport.2007.02.003>
- Papaioannou, A. G., Tsigilis, N., Kosmidou, E., & Milosis, D. (2007). Measuring perceived motivational climate in physical education. *Journal of Teaching in Physical Education*, 26(3), 236–259. <https://doi.org/10.1123/jtpe.26.3.236>
- Papaioannou, A., & Kouli, O. (1999). The effect of task structure, perceived motivational climate and goal orientations on students' task involvement and anxiety. *Journal of Applied Sport Psychology*, 11(1), 51–71. <https://doi-org.lib-e2.lib.ttu.edu/10.1080/10413209908402950>
- Papioannou, A. (1995). Differential perceptual and motivational patterns when different goals are adopted. *Journal of Sport & Exercise Psychology*, 17(1), 18–34.
- Parental climate in sports. (1999). *Journal of Sport & Exercise Psychology*, 21(2), 184.
- Pensgaard, A. M. (1999). The dynamics of motivation and perceptions of control when competing in the Olympic Games. *Perceptual and Motor Skills*, 89(1), 116–125. <https://doi.org.lib.ttu.edu/10.2466/PMS.89.5.116-125>
- Pensgaard, A. M., & Roberts, G. C. (2000). The relationship between motivational climate, perceived ability and sources of distress among elite athletes. *Journal of Sports Sciences*, 18(3), 191–200.



|                                                                                                                                                                                                                                                                                                                                                                          |
|--------------------------------------------------------------------------------------------------------------------------------------------------------------------------------------------------------------------------------------------------------------------------------------------------------------------------------------------------------------------------|
| Pensgaard, A. M., Roberts, G. C., & Ursin, H. (1999). Motivational Factors and Coping Strategies of Norwegian Paralympic and Olympic Winter Sport Athletes. <i>Adapted Physical Activity Quarterly</i> , 16(3), 238–250. <a href="https://doi.org/10.1123/apaq.16.3.238">https://doi.org/10.1123/apaq.16.3.238</a>                                                       |
| Pfeffer, I., & Gallitschke, M. (2008). Trainerinnen und Trainer im Frauenfußball aus Sicht der Athletinnen. <i>Zeitschrift Für Sportpsychologie</i> , 15(3), 88–95. <a href="https://doi.org/10.1026/1612-5010.15.3.88">https://doi.org/10.1026/1612-5010.15.3.88</a>                                                                                                    |
| Pfeffer, I., Wuerth, S., & Alfermann, D. (2004). Die subjektive Wahrnehmung der Trainer-Athlet-Interaktion in Individualsportarten und Mannschaftsspielen. / Subjective perception of the coach-athlete interaction in individual and team sports. <i>German Journal of Sport Psychology / Zeitschrift Für Sportpsychologie</i> , 11(1), 24–32.                          |
| Pineda-Espejel, A., López-Walle, J., & Tomás, I. (2015). Factores situacionales y disposicionales como predictores de la ansiedad y autoconfianza precompetitiva en deportistas universitarios. <i>Cuadernos de Psicología Del Deporte</i> , 15(2), 55–70. <a href="https://doi.org/10.4321/s1578-84232015000200007">https://doi.org/10.4321/s1578-84232015000200007</a> |
| Pineda-Espejel, H. A., Alarcón, E., Morquecho-Sánchez, R., Morales-Sánchez, V., & Gadea-Cavazos, E. (2021). Adaptive social factors and precompetitive anxiety in elite sport. <i>Frontiers in Psychology</i> , 12. <a href="https://doi.org/10.3389/fpsyg.2021.651169">https://doi.org/10.3389/fpsyg.2021.651169</a>                                                    |
| Pineda-Espejel, H. A., Alarcón, E., Morquecho-Sánchez, R., Morales-Sánchez, V., & Gadea-Cavazos, E. (2021). Adaptive Social Factors and Precompetitive Anxiety in Elite Sport. <i>Frontiers in Psychology</i> , 12. <a href="https://doi.org/10.3389/fpsyg.2021.651169">https://doi.org/10.3389/fpsyg.2021.651169</a>                                                    |
| Pitsi, A., Digelidis, N., & Papaioannou, A. (2015). The effects of reciprocal and self-check teaching styles in students' intrinsic-extrinsic motivation, enjoyment and autonomy in teaching traditional Greek dances. <i>Journal of Physical Education &amp; Sport</i> , 15(2), 352–361.                                                                                |
| Quested, E., & Duda, J. L. (2009). Perceptions of the Motivational Climate, Need Satisfaction, and Indices of Well- and Ill-Being among Hip Hop Dancers. <i>Journal of Dance Medicine &amp; Science</i> , 13(1), 10–19. <a href="https://doi.org/10.1177/1089313x0901300102">https://doi.org/10.1177/1089313x0901300102</a>                                              |
| Quested, E., & Duda, J. L. (2010). Exploring the Social-Environmental Determinants of Well- and Ill-Being in Dancers: A Test of Basic Needs Theory. <i>Journal of Sport and Exercise Psychology</i> , 32(1), 39–60. <a href="https://doi.org/10.1123/jsep.32.1.39">https://doi.org/10.1123/jsep.32.1.39</a>                                                              |
| Quested, E., & Duda, J. L. (2010). Exploring the Social-Environmental Determinants of Well- and Ill-Being in Dancers: A Test of Basic Needs Theory. <i>Journal of Sport and Exercise Psychology</i> , 32(1), 39–60. <a href="https://doi.org/10.1123/jsep.32.1.39">https://doi.org/10.1123/jsep.32.1.39</a>                                                              |

|                                                                                                                                                                                                                                                                                                                                                                                                                                                                                                                                                      |
|------------------------------------------------------------------------------------------------------------------------------------------------------------------------------------------------------------------------------------------------------------------------------------------------------------------------------------------------------------------------------------------------------------------------------------------------------------------------------------------------------------------------------------------------------|
| <p>Quintas, A., &amp; Bustamante, J.-C. (2021). Effects of gamified didactic with exergames on the psychological variables associated with promoting physical exercise: results of a natural experiment run in primary schools. <i>Physical Education and Sport Pedagogy</i>, 28(5), 467–481. <a href="https://doi.org/10.1080/17408989.2021.1991905">https://doi.org/10.1080/17408989.2021.1991905</a></p>                                                                                                                                          |
| <p>Raimundi, M. J., Corti, J. F., Pérez-Gaido, M., Alvarez, O., &amp; Castillo, I. (2023). Which Assessment of Coach-Created Motivational Climate Better Predicts Young Athletes' Engagement over a Season? Athletes' Perceptions and Match Observations Do. <i>Sustainability</i>, 15(6), 5179. <a href="https://doi.org/10.3390/su15065179">https://doi.org/10.3390/su15065179</a></p>                                                                                                                                                             |
| <p>Raimundi, M. J., Pérez-Gaido, M., Celsi, I., &amp; Castillo, I. (2022). Evaluación de los Estilos Interpersonales y Climas Motivacionales Creados por Entrenadores en Deporte Adolescente Argentino = Evaluation of interpersonal styles and motivational climates created by coaches in Argentinean adolescent sport. <i>Revista Iberoamericana de Diagnóstico y Evaluación Psicológica</i>, 65(4), 163–178. <a href="https://doi-org.lib-e2.lib.ttu.edu/10.21865/RIDEP65.4.12">https://doi-org.lib-e2.lib.ttu.edu/10.21865/RIDEP65.4.12</a></p> |
| <p>Reinboth, M., &amp; Duda, J. L. (2004). The Motivational Climate, Perceived Ability, and Athletes' Psychological and Physical Well-Being. <i>The Sport Psychologist</i>, 18(3), 237–251. <a href="https://doi.org/10.1123/tsp.18.3.237">https://doi.org/10.1123/tsp.18.3.237</a></p>                                                                                                                                                                                                                                                              |
| <p>Reinboth, M., &amp; Duda, J. L. (2006). Perceived motivational climate, need satisfaction and indices of well-being in team sports: A longitudinal perspective. <i>Psychology of Sport and Exercise</i>, 7(3), 269–286. <a href="https://doi.org/10.1016/j.psychsport.2005.06.002">https://doi.org/10.1016/j.psychsport.2005.06.002</a></p>                                                                                                                                                                                                       |
| <p>Reinboth, M., &amp; Duda, J. L. (2016). Effects of competitive environment and outcome on achievement behaviors and well-being while engaged in a physical task. <i>Sport, Exercise, and Performance Psychology</i>, 5(4), 324–336. <a href="https://doi.org/10.1037/spy0000075">https://doi.org/10.1037/spy0000075</a></p>                                                                                                                                                                                                                       |
| <p>Reinboth, M., Duda, J. L., &amp; Ntoumanis, N. (2004). Dimensions of Coaching Behavior, Need Satisfaction, and the Psychological and Physical Welfare of Young Athletes. <i>Motivation and Emotion</i>, 28(3), 297–313. <a href="https://doi.org/10.1023/b:moem.0000040156.81924.b8">https://doi.org/10.1023/b:moem.0000040156.81924.b8</a></p>                                                                                                                                                                                                   |
| <p>Reverberi, E., D'Angelo, C., Littlewood, M. A., &amp; Gozzoli, C. F. (2020). Youth Football Players' Psychological Well-Being: The Key Role of Relationships. <i>Frontiers in Psychology</i>, 11. <a href="https://doi.org/10.3389/fpsyg.2020.567776">https://doi.org/10.3389/fpsyg.2020.567776</a></p>                                                                                                                                                                                                                                           |
| <p>Robazza, C., Morano, M., Bortoli, L., &amp; Ruiz, M. C. (2022). Perceived motivational climate influences athletes' emotion regulation strategies, emotions, and psychobiosocial experiences. <i>Psychology of Sport and Exercise</i>, 59, 102110. <a href="https://doi.org/10.1016/j.psychsport.2021.102110">https://doi.org/10.1016/j.psychsport.2021.102110</a></p>                                                                                                                                                                            |
| <p>Robazza, C., Ruiz, M. C., &amp; Bortoli, L. (2021). Psychobiosocial experiences in sport: Development and initial validation of a semantic differential scale. <i>Psychology of Sport and Exercise</i>, 55, 101963. <a href="https://doi.org/10.1016/j.psychsport.2021.101963">https://doi.org/10.1016/j.psychsport.2021.101963</a></p>                                                                                                                                                                                                           |

- Robinson, L. E., & Goodway, J. D. (2009). Instructional Climates in Preschool Children Who Are At-Risk. Part I. Research Quarterly for Exercise and Sport, 80(3), 533–542. <https://doi.org/10.1080/02701367.2009.10599591>
- Rodrigues Alves, M. A., Oliveira, A. dos S., Paes, M. J., & Facco Stefanello, J. M. (2022). Psychological aspects of soccer and futsal players: A systematic review. Suma Psicológica, 29(1), 30–47.
- Rodrigues, F., Macedo, R., Cid, L., Teixeira, D. S., Marinho, D. A., & Monteiro, D. (2020). Sex differences in relationships between perceived coach-induced motivational climates, basic psychological needs, and behavior regulation among young swimmers. Perceptual and Motor Skills, 127(5), 891–911. <https://doi.org/10.1177/0031512520926805>
- Rudisill, M. E. (2016). Mastery Motivational Climates: Motivating Children to Move and Learn in Physical Education Contexts. Kinesiology Review, 5(3), 157–169.
- Ruiz-Juan, F., Baños, R., Fuentesal-Garcia, J., García-Montes, E., & Baena-Extremuera, A. (2019). ANÁLISIS TRANSCULTURAL DEL CLIMA MOTIVACIONAL EN ALUMNADO DE COSTA RICA, MÉXICO Y ESPAÑA. Revista Internacional de Medicina y Ciencias de La Actividad Física y Del Deporte, 19(74). <https://doi.org/10.15366/rimcafd2019.74.011>
- Ruiz, M. C., Appleton, P. R., Duda, J. L., Bortoli, L., & Robazza, C. (2021). Social Environmental Antecedents of Athletes' Emotions. International Journal of Environmental Research and Public Health, 18(9), 4997. <https://doi.org/10.3390/ijerph18094997>
- Ruiz, M. C., Haapanen, S., Tolvanen, A., Robazza, C., & Duda, J. L. (2017). Predicting athletes' functional and dysfunctional emotions: The role of the motivational climate and motivation regulations. Journal of Sports Sciences, 1–9. <https://doi.org/10.1080/02640414.2016.1225975>
- Ruiz, M. C., Robazza, C., Tolvanen, A., Haapanen, S., & Duda, J. L. (2019). Coach-Created Motivational Climate and Athletes' Adaptation to Psychological Stress: Temporal Motivation-Emotion Interplay. Frontiers in Psychology, 10. <https://doi.org/10.3389/fpsyg.2019.00617>
- Russell, W. D. (2014). The Relationship between Youth Sport Specialization, Reasons for Participation, and Youth Sport Participation Motivations: A Retrospective Study. Journal of Sport Behavior, 37(3), 286–305.
- Salselas, V., & Márquez, S. (2009). Perceptions of the Motivational Climate Created by Parents of Young Portuguese Swimmers. Perceptual and Motor Skills, 108(3), 851–861. <https://doi.org/10.2466/pms.108.3.851-861>

Sánchez-Miguel, P. A., Leo, F. M., Sánchez-Oliva, D., Amado, D., & García-Calvo, T. (2013). The Importance of Parents' Behavior in their Children's Enjoyment and Amotivation in Sports. *Journal of Human Kinetics*, 36(1), 169–177. <https://doi.org/10.2478/hukin-2013-0017>

Sánchez-Oliva, D., Leo-Marcos, F. M., Sánchez-Miguel, P. A., Amado-Alonso, D., & García-Calvo, T. (2010). Relación del clima motivacional creado por el entrenador con la motivación autodeterminada y la implicación hacia la práctica deportiva. (Relationship between motivational climate created by coach regarding self-determined motivation and the involvement through the practice). *RICYDE. Revista Internacional de Ciencias Del Deporte*, 6(20), 177–195. <https://doi.org/10.5232/ricyde2010.02001>

Sánchez-Oliva, D., Leo, F. M., González-Ponce, I., Chamorro, J. M., & García-Calvo, T. (2012). Analizando la implicación deportiva en jóvenes jugadores de baloncesto: Un análisis desde la Teoría de la Autodeterminación. / Examining sport involvement in youth basketball players: an analysis from self-determination theory. *Cuadernos de Psicología Del Deporte*, 12(S1), 57–61.

Sánchez, M., Sánchez-Sánchez, J., Carcedo, R. J., & García, J. A. (2020). Climate, Orientation and Fun in Under-12 Soccer Players. / Clima, Orientación Motivacional Y Diversión en Futbolistas Alevines. *International Journal of Medicine & Science of Physical Activity & Sport / Revista Internacional de Medicina y Ciencias de La Actividad Física y Del Deporte*, 20(79), 507–520.

Santos-Rosa, F. J., Montero-Carretero, C., Gómez-Landero, L. A., Torregrossa, M., & Cervelló, E. (2022). Positive and negative spontaneous self-talk and performance in gymnastics: The role of contextual, personal and situational factors. *PLOS ONE*, 17(3), e0265809. <https://doi.org/10.1371/journal.pone.0265809>

Sari, İ., & Bizan, İ. (2022). The role of parent initiated motivational climate in athletes' engagement and dispositional flow. *Kinesiology*, 54(1), 3–4. <https://doi.org/10.26582/k.54.1.1>

Sari, İ., & Deryahanoğlu, G. (2019). Sporcularda Ahlaktan Uzaklaşmanın Güdüsöl İklim Ve Sporcuların Önem Verdikleri Özellikler İle İlişkisi. / the Relationship of Athletes' Moral Disengagement to Perceived Motivational Climate and Valued Goals. *SPORMETRE: The Journal of Physical Education & Sport Sciences / Beden Eğitimi ve Spor Bilimleri Dergisi*, 17(4), 91–104.

Scott, C. E., Fry, M. D., Weingartner, H., & Wineinger, T. O. (2021). Collegiate Sport Club Athletes' Psychological Well-Being and Perceptions of Their Team Climate. *Recreational Sports Journal*, 45(1), 17–26. <https://doi.org/10.1177/1558866121995169>

Scott, C. E., Wineinger, T. O., Iwasaki, S., & Fry, M. D. (2021b). Creating an Optimal Motivational Team Climate to Help Collegiate Athletes Thrive during the COVID-19 Pandemic. *Journal of Sport Psychology in Action*, 12(2), 127–141. <https://doi.org/10.1080/21520704.2021.1876194>

|                                                                                                                                                                                                                                                                                                                                                                                                         |
|---------------------------------------------------------------------------------------------------------------------------------------------------------------------------------------------------------------------------------------------------------------------------------------------------------------------------------------------------------------------------------------------------------|
| Selfriz, J. J., Duda, J. L., & Chi, L. (1992). The Relationship of Perceived Motivational Climate to Intrinsic Motivation and Beliefs about Success in Basketball. <i>Journal of Sport and Exercise Psychology</i> , 14(4), 375–391. <a href="https://doi.org/10.1123/jsep.14.4.375">https://doi.org/10.1123/jsep.14.4.375</a>                                                                          |
| Sevil, J., Abós, Á., Aibar, A., Julián, J. A., & García-González, L. (2016). Gender and corporal expression activity in physical education. <i>European Physical Education Review</i> , 22(3), 372–389.                                                                                                                                                                                                 |
| SGRÒ, F., BARCA, M., SCHEMBRI, R., & LIPOMA, M. (2020). Assessing the effect of different teaching strategies on students' affective learning outcomes during volleyball lessons. <i>Journal of Physical Education &amp; Sport</i> , 20, 2136–2142.                                                                                                                                                     |
| Sgrò, F., Barca, M., Schembri, R., & Lipoma, M. (2020). Assessing the effect of different teaching strategies on students' affective learning outcomes during volleyball lessons. <i>Journal of Physical Education &amp; Sport</i> , 20, 2136–2142.                                                                                                                                                     |
| Sheehan, R. B., Herring, M. P., & Campbell, M. J. (2018). Longitudinal relations of mental health and motivation among elite student-athletes across a condensed season: Plausible influence of academic and athletic schedule. <i>Psychology of Sport and Exercise</i> , 37, 146–152. <a href="https://doi.org/10.1016/j.psychsport.2018.03.005">https://doi.org/10.1016/j.psychsport.2018.03.005</a>  |
| Sheehan, R. B., Herring, M. P., & Campbell, M. J. (2018a). Longitudinal relations of mental health and motivation among elite student-athletes across a condensed season: Plausible influence of academic and athletic schedule. <i>Psychology of Sport and Exercise</i> , 37, 146–152. <a href="https://doi.org/10.1016/j.psychsport.2018.03.005">https://doi.org/10.1016/j.psychsport.2018.03.005</a> |
| Sheehan, R. B., Herring, M. P., & Campbell, M. J. (2018b). Associations Between Motivation and Mental Health in Sport: A Test of the Hierarchical Model of Intrinsic and Extrinsic Motivation. <i>Frontiers in Psychology</i> , 9. <a href="https://doi.org/10.3389/fpsyg.2018.00707">https://doi.org/10.3389/fpsyg.2018.00707</a>                                                                      |
| Shipherd, A. M., Wakefield, J. C., Stokowski, S., & Filho, E. (2019). The influence of coach turnover on student-athletes' affective states and team dynamics: An exploratory study in collegiate sports. <i>International Journal of Sports Science &amp; Coaching</i> , 14(1), 97–106.                                                                                                                |
| Smith, A. L., Balaguer, I., & Duda, J. L. (2006). Goal orientation profile differences on perceived motivational climate, perceived peer relationships, and motivation-related responses of youth athletes. <i>Journal of Sports Sciences</i> , 24(12), 1315–1327. <a href="https://doi.org/10.1080/02640410500520427">https://doi.org/10.1080/02640410500520427</a>                                    |
| Smith, A. L., Gustafsson, H., & Hassmén, P. (2010). Peer motivational climate and burnout perceptions of adolescent athletes. <i>Psychology of Sport and Exercise</i> , 11(6), 453–460. <a href="https://doi.org/10.1016/j.psychsport.2010.05.007">https://doi.org/10.1016/j.psychsport.2010.05.007</a>                                                                                                 |

- Smith, N., Tessier, D., Tzioumakis, Y., Quested, E., Appleton, P., Sarrazin, P., Papaioannou, A., & Duda, J. L. (2015). Development and Validation of the Multidimensional Motivational Climate Observation System. *Journal of Sport and Exercise Psychology*, 37(1), 4–22. <https://doi.org/10.1123/jsep.2014-0059>
- Smith, R. E., Smoll, F. L., & Cumming, S. P. (2007). Effects of a motivational climate intervention for coaches on young athletes' sport performance anxiety. *Journal of Sport & Exercise Psychology*, 29(1), 39–59.
- Smith, R., Cumming, S., & Smoll, F. (2008). Development and Validation of the Motivational Climate Scale for Youth Sports. *Journal of Applied Sport Psychology*, 20(1), 116–136.
- Smith, Ronald E., Frank L. Smoll, Sean P. Cumming, and Joel R. Grossbard. 2006. "Measurement of Multidimensional Sport Performance Anxiety in Children and Adults: The Sport Anxiety Scale-2." *Journal of Sport & Exercise Psychology* 28 (4): 479–501. doi:10.1123/jsep.28.4.479.
- Sokoloff, D. M., Petrie, T. A., & Chu, T. L. (Alan). (2023). The Relationship of Coach-Created Motivational Climate to Teamwork Behaviors in Female Collegiate Athletes. *The Sport Psychologist*, 37(1), 40–47. <https://doi.org/10.1123/tsp.2022-0070>
- Solmon, M. A. (2015). Optimizing the Role of Physical Education in Promoting Physical Activity: A Social-Ecological Approach. *Research Quarterly for Exercise and Sport*, 86(4), 329–337. <https://doi.org/10.1080/02701367.2015.1091712>
- Solstad, B. E., & Lemyre, P.-N. (2014). Why Coaches should Encourage Swimmers' Efforts to Succeed. *Journal of Swimming Research*, 22(1), 1–9.
- Solstad, B. E., Ivarsson, A., Haug, E. M., & Ommundsen, Y. (2018). Youth Sport Coaches' Well-Being Across the Season: The Psychological Costs and Benefits of Giving Empowering and Disempowering Sports Coaching to Athletes. *International Sport Coaching Journal*, 5(2), 124–135. <https://doi.org/10.1123/iscj.2017-0026>
- Spittle, M., & Byrne, K. (2009). The influence of Sport Education on student motivation in physical education. *Physical Education & Sport Pedagogy*, 14(3), 253–266.
- Spray, C. M. (2000). Predicting participation in noncompulsory physical education: Do goal perspectives matter. *Perceptual and Motor Skills*, 90(3,Pt2), 1207–1215. <https://doi-org.lib-e2.lib.ttu.edu/10.2466/PMS.90.3.1207-1215>
- Stark, A., & Newton, M. (2014). A dancer's well-being: The influence of the social psychological climate during adolescence. *Psychology of Sport and Exercise*, 15(4), 356–363. <https://doi.org/10.1016/j.psychsport.2014.03.003>

|                                                                                                                                                                                                                                                                                                                                                                                           |
|-------------------------------------------------------------------------------------------------------------------------------------------------------------------------------------------------------------------------------------------------------------------------------------------------------------------------------------------------------------------------------------------|
| Steffen, K., Pensgaard, A. M., & Bahr, R. (2009). Self-reported psychological characteristics as risk factors for injuries in female youth football. <i>Scandinavian Journal of Medicine &amp; Science in Sports</i> , 19(3), 442–451.                                                                                                                                                    |
| Sukys, S., Kromerova-Dubinskiene, E., & Appleton, P. R. (2020). Validation of the Lithuanian Version of the Coach-Created Empowering and Disempowering Motivational Climate Questionnaire (EDMCQ-C). <i>International Journal of Environmental Research and Public Health</i> , 17(10), 3487. <a href="https://doi.org/10.3390/ijerph17103487">https://doi.org/10.3390/ijerph17103487</a> |
| Sullivan, G. S., & Strode, J. P. (2010). Motivation through Goal Setting: A Self-Determined Perspective. <i>Strategies: A Journal for Physical and Sport Educators</i> , 23(6), 19–23.                                                                                                                                                                                                    |
| Tamminen, K. A., Gaudreau, P., McEwen, C. E., & Crocker, P. R. E. (2016). Interpersonal Emotion Regulation Among Adolescent Athletes: A Bayesian Multilevel Model Predicting Sport Enjoyment and Commitment. <i>Journal of Sport and Exercise Psychology</i> , 38(6), 541–555. <a href="https://doi.org/10.1123/jsep.2015-0189">https://doi.org/10.1123/jsep.2015-0189</a>                |
| Task-involving climate is tops. (1999). <i>Journal of Sport &amp; Exercise Psychology</i> , 21(2), 182.                                                                                                                                                                                                                                                                                   |
| Taylor, I. M., & Ntoumanis, N. (2007). Teacher motivational strategies and student self-determination in physical education. <i>Journal of Educational Psychology</i> , 99(4), 747–760. <a href="https://doi-org.lib-e2.lib.ttu.edu/10.1037/0022-0663.99.4.747">https://doi-org.lib-e2.lib.ttu.edu/10.1037/0022-0663.99.4.747</a>                                                         |
| Taylor, I. M., Spray, C. M., & Pearson, N. (2014). The Influence of the Physical Education Environment on Children’s Well-Being and Physical Activity Across the Transition from Primary to Secondary School. <i>Journal of Sport and Exercise Psychology</i> , 36(6), 574–583. <a href="https://doi.org/10.1123/jsep.2014-0038">https://doi.org/10.1123/jsep.2014-0038</a>               |
| The Digest for October 2012. (2012). <i>Journal of Sport &amp; Exercise Psychology</i> , 34(5), 683–691.                                                                                                                                                                                                                                                                                  |
| The Digest. (2014). <i>Journal of Sport &amp; Exercise Psychology</i> , 36(3), 321–326.                                                                                                                                                                                                                                                                                                   |
| Theeboom, M., & De Knop, P. (1995). Motivational Climate, Psychological Responses, and Motor Skill Development in Children’s Sport: A Field-Based Intervention Study. <i>Journal of Sport &amp; Exercise Psychology</i> , 17(3), 294–311.                                                                                                                                                 |
| Theodosiou, A., & Papaioannou, A. (2006). Motivational climate, achievement goals and metacognitive activity in physical education and exercise involvement in out-of-school settings. <i>Psychology of Sport and Exercise</i> , 7(4), 361–379.                                                                                                                                           |

|                                                                                                                                                                                                                                                                                                                                                                                                                                                              |
|--------------------------------------------------------------------------------------------------------------------------------------------------------------------------------------------------------------------------------------------------------------------------------------------------------------------------------------------------------------------------------------------------------------------------------------------------------------|
| THEODOSIOU, A., GERANI, C., BARKOUKIS, V., TSIGILIS, N., DRAKOU, A., WILLIAMS, S., KERSHAW, A., & ROSE, M. (2021). Motivation and well-being in school physical education A cross-national study of self determination theory. <i>International Journal of Sport Psychology</i> , 52(3), 213–232.                                                                                                                                                            |
| Thrower, S. N., Spray, C. M., & Harwood, C. G. (2023). Evaluating the “Optimal Competition Parenting Workshop” Using the RE-AIM Framework: A 4-Year Organizational-Level Intervention in British Junior Tennis. <i>Journal of Sport &amp; Exercise Psychology</i> , 45(1), 1–14. <a href="https://doi.org/10.1123/jsep.2022-0080">https://doi.org/10.1123/jsep.2022-0080</a>                                                                                 |
| Torregrosa, M., Sousa, C., Viladrich, C., Villamarín, F., & Cruz, J. (2008). El clima motivacional y el estilo de comunicación del entrenador como predictores del compromiso en futbolistas jóvenes = Motivational climate and coaches’ communication style predict young soccer players’ commitment. <i>Psicothema</i> , 20(2), 254–259.                                                                                                                   |
| Torregrosa, M., Viladrich, C., Ramis, Y., Azócar, F., Latinjak, A. T., & Cruz, J. (2011). Efectos en la percepción del clima motivacional generado por los entrenadores y compañeros sobre la diversión y el compromiso Diferencias en función de género = Effects on the perception of the motivational climate created by coaches and teammates on enjoyment and commitment Gender differences. <i>Revista de Psicología Del Deporte</i> , 20(1), 243–255. |
| Travers, L. V., Bohnert, A. M., & Randall, E. T. (2013). Brief report: Adolescent adjustment in affluent communities: The role of motivational climate and goal orientation. <i>Journal of Adolescence</i> , 36(2), 423–428. <a href="https://doi.org/10.1016/j.adolescence.2012.11.009">https://doi.org/10.1016/j.adolescence.2012.11.009</a>                                                                                                               |
| Trbojević Jocić, J., & Petrović, J. (2021). Understanding of dropping out of sports in adolescence. <i>Kinesiology</i> , 53(2), 245–256. <a href="https://doi.org/10.26582/k.53.2.7">https://doi.org/10.26582/k.53.2.7</a>                                                                                                                                                                                                                                   |
| Trbojević Jocić, J., & Petrović, J. (2021). Understanding of dropping out of sports in adolescence. <i>Kinesiology</i> , 53(2), 245–256. <a href="https://doi.org/10.26582/k.53.2.7">https://doi.org/10.26582/k.53.2.7</a>                                                                                                                                                                                                                                   |
| Trbojević, J., Mandarić, S., & Petrović, J. (2020). Perceived motivational climate created by coach and physical self-efficacy as predictors of the young Serbian female athletes satisfaction. <i>Fizicka Kultura</i> , 74(2), 173–183. <a href="https://doi.org/10.5937/fizkul74-28098">https://doi.org/10.5937/fizkul74-28098</a>                                                                                                                         |
| Treasure, D. C. (1997). Perceptions of the Motivational Climate and Elementary School Children’s Cognitive and Affective Response. <i>Journal of Sport and Exercise Psychology</i> , 19(3), 278–290. <a href="https://doi.org/10.1123/jsep.19.3.278">https://doi.org/10.1123/jsep.19.3.278</a>                                                                                                                                                               |



- Treasure, D. C., & Robert, G. C. (2001). Students' Perceptions of the Motivational Climate, Achievement Beliefs, and Satisfaction in Physical Education. *Research Quarterly for Exercise and Sport*, 72(2), 165–175. <https://doi.org/10.1080/02701367.2001.10608946>
- Treasure, D. C., & Roberts, G. C. (1998). Relationship between female adolescents' achievement goal orientations, perceptions of the motivational climate, belief about success and sources of satisfaction in basketball. / Relation entre les buts de réussite, les perceptions du climat motivationnel, les espoirs de réussite et les sources de satisfaction chez des adolescentes pratiquant le basketball. *International Journal of Sport Psychology*, 293, 211–230.
- Trenz, R. C., & Zusho, A. (2011). Competitive Swimmers' Perception of Motivational Climate and Their Personal Achievement Goals. *International Journal of Sports Science & Coaching*, 6(3), 433–443. <https://doi.org/10.1260/1747-9541.6.3.433>
- Troncoso Avalos, S. M., Burgos Dávila, C. J., & López-Walle, J. M. (2015). Climas motivacionales, liderazgo y cohesión grupal en contexto deportivo universitario. / Motivational atmosphere, leadership and group cohesion in university sports context. *Educación Física y Ciencia*, 17(1), 1–12.
- Tudor, M., & Ridpath, B. D. (2019). Does Gender Significantly Predict Academic, Athletic Career Motivation among NCAA Division I College Athletes. *Journal of Higher Education Athletics & Innovation*, 5, 122–147. <https://doi.org/10.15763/issn.2376-5267.2018.1.5.122-147>
- Ullrich-French, S., & Cox, A. E. (2014). Normative and intraindividual changes in physical education motivation across the transition to middle school: A multilevel growth analysis. *Sport, Exercise, and Performance Psychology*, 3(2), 132–147. <https://doi-org.lib-e2.lib.ttu.edu/10.1037/spy0000005>
- Valero, A., Delgado, M., & Conde, J. L. (2009). Motivación hacia la práctica del atletismo en la educación primaria en función de dos propuestas de enseñanza/aprendizaje = Motivation towards athletics practice in primary education depending on two different teaching/learning proposals. *Revista de Psicología Del Deporte*, 18(2), 123–136.
- van de Pol, P. K. C., Kavussanu, M., & Ring, C. (2012). Goal orientations, perceived motivational climate, and motivational outcomes in football: A comparison between training and competition contexts. *Psychology of Sport & Exercise*, 13(4), 491–499.
- Vaquero-Cristóbal, R., Abenza-Cano, L., Albaladejo-Saura, M., Meroño, L., Marcos-Pardo, P. J., Esparza-Ros, F., & González-Gálvez, N. (2021). Influence of an educational innovation program and digitally supported tasks on psychological aspects, motivational climate, and academic performance. *Education Sciences*, 11(12), 1–12. <https://doi-org.lib-e2.lib.ttu.edu/10.3390/educsci11120821>

- Vasconcelos-Raposo, J., Carvalho, R., & Teixeira, C. (2012). Percepção de competência atlética em jovens praticantes de Futebol: Efeitos da posição ocupada no campo, da participação em competição, do tempo e frequência de prática e do clima motivacional... / Perceived athletic competence in young football players: Effects of the position occupied in the field, participation in competition, time and frequency of practice and motivational climate induced by parents. *Revista Portuguesa de Ciências Do Desporto*, 12(2), 58–70.
- Vazou, S., Mischo, A., Ladwig, M. A., Ekkekakis, P., & Welk, G. (2019). Psychologically informed physical fitness practice in schools: A field experiment. *Psychology of Sport and Exercise*, 40, 143–151. <https://doi.org/10.1016/j.psychsport.2018.10.008>
- Vazou, S., Ntoumanis, N., & Duda, J. L. (2006). Predicting young athletes' motivational indices as a function of their perceptions of the coach- and peer-created climate. *Psychology of Sport and Exercise*, 7(2), 215–233. <https://doi.org.lib-e2.lib.ttu.edu/10.1016/j.psychsport.2005.08.007>
- Vitali, F., Bortoli, L., Bertinato, L., Robazza, C., & Schena, F. (2015). Motivational climate, resilience, and burnout in youth sport. *Sport Sciences for Health*, 11(1), 103–108. <https://doi.org/10.1007/s11332-014-0214-9>
- Vosloo, J., Ostrow, A., & Watson, J. C. (2009). The Relationships Between Motivational Climate, Goal Orientations, Anxiety, and Self-Confidence Among Swimmers. *Journal of Sport Behavior*, 32(3), 376–393.
- Wagnsson, S., Stenling, A., Gustafsson, H., & Augustsson, C. (2016). Swedish youth football players' attitudes towards moral decision in sport as predicted by the parent-initiated motivational climate. *Psychology of Sport & Exercise*, 25, 110–114.
- Walker, I. J., Nordin-Bates, S. M., & Redding, E. (2011). Characteristics of talented dancers and age group differences: findings from the UK Centres for Advanced Training. *High Ability Studies*, 22(1), 43–60. <https://doi.org/10.1080/13598139.2011.597587>
- Wallhead, T. L., & Ntoumanis, N. (2004). Effects of a Sport Education Intervention on Students' Motivational Responses in Physical Education. *Journal of Teaching in Physical Education*, 23(1), 4–18.
- Walling, M. D., Duda, J. L., & Chi, L. (1993). The Perceived Motivational Climate in Sport Questionnaire: Construct and Predictive Validity. *Journal of Sport and Exercise Psychology*, 15(2), 172–183. <https://doi.org/10.1123/jsep.15.2.172>
- Wang, J. C. K., Woon Chia Liu, Chatzisarantis, N. L. D., & Lim, C. B. S. (2010). Influence of Perceived Motivational Climate on Achievement Goals in Physical Education: A Structural Equation Mixture Modeling Analysis. *Journal of Sport & Exercise Psychology*, 32(3), 324–338.

- Webb, E., & Forrester, S. (2016). Peer Motivational Climate and Its Relationship with Positive and Negative Affect in Collegiate Intramural Sports. *International Journal of Sport Management*, 17(4), 622–645.
- Weeldenburg, G., Borghouts, L. B., Slingerland, M., & Vos, S. (2020). Similar but different: Profiling secondary school students based on their perceived motivational climate and psychological need-based experiences in physical education. *PLoS ONE*, 15(2). <https://doi-org.lib-e2.lib.ttu.edu/10.1371/journal.pone.0228859>
- Weigand, D. A. (2001). Introduction to the Special Issue on Motivational Climate in Sport and Physical Education. *European Journal of Sport Science*, 1(4), 1.
- Weigand, D. A. (2001). Introduction to the Special Issue on Motivational Climate in Sport and Physical Education. *European Journal of Sport Science*, 1(4), 1.
- Weigand, D., & Burton, S. (2002). Manipulating achievement motivation in physical education by manipulating the motivational climate. *European Journal of Sport Science*, 2(1), 1–14. <https://doi.org/10.1080/17461390200072102>
- Weiss, M. R., Amorose, A. J., & Wilko, A. M. (2009). Coaching Behaviors, Motivational Climate, and Psychosocial Outcomes among Female Adolescent Athletes. *Pediatric Exercise Science*, 21(4), 475–492. <https://doi.org/10.1123/pes.21.4.475>
- Weiss, W. M. (2014). Competitive-level differences on sport commitment among high school- and collegiate-level athletes. *International Journal of Sport and Exercise Psychology*, 13(3), 286–303. <https://doi.org/10.1080/1612197x.2014.958517>
- White, S. A. (1998). Adolescent goal profiles, perceptions of the parent-initiated motivational climate, and competitive trait anxiety. *The Sport Psychologist*, 12(1), 16–28.
- Whitehead, J., Andrée, K. V., & Lee, M. J. (2004). Achievement perspectives and perceived ability: how far do interactions generalize in youth sport? *Psychology of Sport and Exercise*, 5(3), 291–317. [https://doi.org/10.1016/s1469-0292\(03\)00016-5](https://doi.org/10.1016/s1469-0292(03)00016-5)
- Wilhelmsen, T., Sørensen, M., & Seippel, Ø. N. (2019). Motivational Pathways to Social and Pedagogical Inclusion in Physical Education. *Adapted Physical Activity Quarterly*, 36(1), 19–41. <https://doi.org/10.1123/apaq.2018-0019>
- Williams, L. (1998). Contextual influences and goal perspectives among female youth sport participants. / Influences contextuelles et perspectives d'objectifs chez des jeunes femmes sportives. *Research Quarterly for Exercise & Sport*, 69(1), 47–57.

|                                                                                                                                                                                                                                                                                                                                                                        |
|------------------------------------------------------------------------------------------------------------------------------------------------------------------------------------------------------------------------------------------------------------------------------------------------------------------------------------------------------------------------|
| Williams, R. E., Habeeb, C. M., Raedeke, T. D., Dlugonski, D., & Dubose, K. D. (2022). Parent Motivational Climate, Sport Enrollment Motives, and Young Athlete Commitment and Enjoyment in Year-Round Swimming. <i>International Journal of Exercise Science</i> , 15(5), 358–372.                                                                                    |
| Woods, S., Dunne, S., & Gallagher, P. (2023). Examining the Utility of Stress-, Motivation-, and Commitment-Based Perspectives of Athlete Burnout. <i>Journal of Sport &amp; Exercise Psychology</i> , 45(5), 257–268. <a href="https://doi.org/10.1123/jsep.2022-0127">https://doi.org/10.1123/jsep.2022-0127</a>                                                     |
| Wu, X., Zainal Abidin, N. E., & Aga Mohd Jaladin, R. (2021). Motivational Processes Influencing Mental Health Among Winter Sports Athletes in China. <i>Frontiers in Psychology</i> , 12. <a href="https://doi.org/10.3389/fpsyg.2021.726072">https://doi.org/10.3389/fpsyg.2021.726072</a>                                                                            |
| Wuerth, S., Saborowski, C., & Alfermann, D. (1999). Trainingsklima und Fuehrungsverhalten aus der Sicht jugendlicher Athleten und deren Trainer. / Motivational climate and leadership behavior as perceived by young athletes and their coaches. <i>Psychologie Und Sport</i> , 6(4), 146–157.                                                                        |
| Zach, S., Raviv, T., & Meckel, Y. (2016). Using information communication technologies (ICTs) for motivating female adolescents to exercise/run in their leisure time. <i>Computers in Human Behavior</i> , 60, 593–601. <a href="https://doi.org/10.1016/j.chb.2016.02.096">https://doi.org/10.1016/j.chb.2016.02.096</a>                                             |
| Zanatta, T., Rottensteiner, C., Kontinen, N., & Lochbaum, M. (2018). Individual Motivations, Motivational Climate, Enjoyment, and Physical Competence Perceptions in Finnish Team Sport Athletes: A Prospective and Retrospective Study. <i>Sports</i> , 6(4), 165. <a href="https://doi.org/10.3390/sports6040165">https://doi.org/10.3390/sports6040165</a>          |
| ZHANG Haijun, GUO Xiaotao, & CHEN Bo. (2015). Effects of Coaches' Paternalistic Leadership Behaviors on Psychological Well-Being in College Athletes: From Self-Determination Theory Perspective. <i>Journal of Wuhan Institute of Physical Education</i> , 49(6), 82–88.                                                                                              |
| Zoltán, K., Barbara, F., István, C., & József, B. (2015). Bentlakó labdarúgó-korosztályok pszichés-mentális jellemzői = Psychological and mental characteristics of young football players living in dorms. <i>Mentálhigiéné És Pszichoszomatika</i> , 16(4), 331–347. <a href="https://doi.org/10.1556/0406.16.2015.4.2">https://doi.org/10.1556/0406.16.2015.4.2</a> |

**Supplement Table 3.** Correlates entered for each study.

| Study                         | Climate               | r     | N   | Correlate description            |
|-------------------------------|-----------------------|-------|-----|----------------------------------|
| Abrahamsen & Kristiansen 2015 | Mastery climate 1     | 0.64  | 27  | Anxiety somatic                  |
| Abrahamsen et al. 2008a       | Mastery climate 1     | 0.13  | 101 | Anxiety somatic                  |
| Abrahamsen et al. 2008a       | Mastery climate 2     | -0.14 | 101 | Anxiety cognitive                |
| Abrahamsen et al. 2008a       | Mastery climate 3     | -0.04 | 101 | Anxiety somatic                  |
| Abrahamsen et al. 2008a       | Mastery climate 4     | -0.14 | 101 | Anxiety cognitive                |
| Abrahamsen et al. 2008a       | Mastery climate 5     | -0.16 | 101 | Anxiety concentration disruption |
| Abrahamsen et al. 2008a       | Mastery climate 6     | -0.03 | 101 | Anxiety concentration disruption |
| Abrahamsen et al. 2008a       | Performance climate 1 | 0.15  | 89  | Anxiety somatic                  |
| Abrahamsen et al. 2008a       | Performance climate 2 | 0.31  | 89  | Anxiety cognitive                |
| Abrahamsen et al. 2008a       | Performance climate 3 | 0.03  | 89  | Anxiety somatic                  |
| Abrahamsen et al. 2008a       | Performance climate 4 | 0.39  | 89  | Anxiety cognitive                |
| Abrahamsen et al. 2008a       | Performance climate 5 | 0.25  | 89  | Anxiety concentration disruption |
| Abrahamsen et al. 2008a       | Performance climate 6 | 0.13  | 89  | Anxiety concentration disruption |
| Abrahamsen et al. 2008b       | Mastery climate 1     | -0.18 | 143 | Anxiety somatic                  |
| Abrahamsen et al. 2008b       | Mastery climate 2     | -0.01 | 143 | Anxiety worry                    |
| Abrahamsen et al. 2008b       | Mastery climate 3     | -0.05 | 143 | Anxiety concentration disruption |
| Abrahamsen et al. 2008b       | Performance climate 1 | 0.03  | 143 | Anxiety somatic                  |
| Abrahamsen et al. 2008b       | Performance climate 2 | 0.16  | 143 | Anxiety worry                    |
| Abrahamsen et al. 2008b       | Performance climate 3 | 0.12  | 143 | Anxiety concentration disruption |
| Abraldes et al. 2016          | Mastery Climate 1     | 0.44  | 163 | Satisfaction fun                 |
| Abraldes et al. 2016          | Mastery Climate 2     | -0.06 | 163 | Satisfaction boredom             |
| Alferman et al. 2013 s1       | Mastery Climate 1     | 0.08  | 56  | Satisfaction                     |
| Alferman et al. 2013 s1       | Performance Climate 1 | -0.03 | 56  | Satisfaction                     |
| Alferman et al. 2013 s2       | Mastery Climate 1     | 0.35  | 117 | Satisfaction                     |
| Alferman et al. 2013 s2       | Performance Climate 1 | 0.17  | 117 | Satisfaction                     |
| Al-Yaaribi & Kavussanu 2018   | Mastery climate 1     | 0.4   | 358 | Fun                              |
| Al-Yaaribi & Kavussanu 2018   | Mastery climate 2     | -0.23 | 358 | Anger                            |
| Al-Yaaribi & Kavussanu 2018   | Performance climate 1 | -0.14 | 358 | Fun                              |

|                             |                          |      |     |           |
|-----------------------------|--------------------------|------|-----|-----------|
| Al-Yaaribi & Kavussanu 2018 | Performance climate 2    | 0.17 | 358 | Anger     |
| Amaro et al. 2023           | Task-involving climate 1 | 0.6  | 109 | Enjoyment |
| Atkins et al. 2013          | Task Climate 2           | 0.13 | 227 | Enjoyment |
| Atkins et al. 2013          | Task Climate 3           | 0.23 | 227 | Happy     |
| Atkins et al. 2013          | Task Climate 4           | 0.15 | 227 | Fun       |
| Atkins et al. 2013          | Task Climate 6           | 0.21 | 227 | Enjoyment |
| Atkins et al. 2013          | Task Climate 7           | 0.22 | 227 | Happy     |
| Atkins et al. 2013          | Task Climate 8           | 0.22 | 227 | Fun       |
| Atkins et al. 2015 s1       | Task Climate 10          | 0.33 | 205 | Enjoyment |
| Atkins et al. 2015 s1       | Task Climate 11          | 0.28 | 205 | Happy     |
| Atkins et al. 2015 s1       | Task Climate 12          | 0.28 | 205 | Fun       |
| Atkins et al. 2015 s1       | Task Climate 16          | 0.29 | 205 | Enjoyment |
| Atkins et al. 2015 s1       | Task Climate 17          | 0.27 | 205 | Happy     |
| Atkins et al. 2015 s1       | Task Climate 18          | 0.26 | 205 | Fun       |
| Atkins et al. 2015 s1       | Task Climate 22          | 0.09 | 205 | Enjoyment |
| Atkins et al. 2015 s1       | Task Climate 23          | 0.16 | 205 | Happy     |
| Atkins et al. 2015 s1       | Task Climate 24          | 0.11 | 205 | Fun       |
| Atkins et al. 2015 s1       | Task Climate 28          | 0.09 | 205 | Enjoyment |
| Atkins et al. 2015 s1       | Task Climate 29          | 0.14 | 205 | Happy     |
| Atkins et al. 2015 s1       | Task Climate 30          | 0.13 | 205 | Fun       |
| Atkins et al. 2015 s1       | Task Climate 34          | 0.28 | 205 | Enjoyment |
| Atkins et al. 2015 s1       | Task Climate 35          | 0.3  | 205 | Happy     |
| Atkins et al. 2015 s1       | Task Climate 36          | 0.3  | 205 | Fun       |
| Atkins et al. 2015 s1       | Task Climate 4           | 0.3  | 205 | Enjoyment |
| Atkins et al. 2015 s1       | Task Climate 5           | 0.3  | 205 | Happy     |
| Atkins et al. 2015 s1       | Task Climate 6           | 0.3  | 205 | Fun       |
| Atkins et al. 2015 s2       | Task Climate 10          | 0.45 | 205 | Enjoyment |
| Atkins et al. 2015 s2       | Task Climate 11          | 0.44 | 205 | Happy     |
| Atkins et al. 2015 s2       | Task Climate 12          | 0.4  | 205 | Fun       |
| Atkins et al. 2015 s2       | Task Climate 16          | 0.38 | 200 | Enjoyment |
| Atkins et al. 2015 s2       | Task Climate 17          | 0.34 | 200 | Happy     |

|                           |                       |        |     |                                 |
|---------------------------|-----------------------|--------|-----|---------------------------------|
| Atkins et al. 2015 s2     | Task Climate 18       | 0.33   | 200 | Fun                             |
| Atkins et al. 2015 s2     | Task Climate 22       | 0.26   | 200 | Enjoyment                       |
| Atkins et al. 2015 s2     | Task Climate 23       | 0.24   | 200 | Happy                           |
| Atkins et al. 2015 s2     | Task Climate 24       | 0.24   | 200 | Fun                             |
| Atkins et al. 2015 s2     | Task Climate 28       | 0.33   | 200 | Enjoyment                       |
| Atkins et al. 2015 s2     | Task Climate 29       | 0.31   | 200 | Happy                           |
| Atkins et al. 2015 s2     | Task Climate 30       | 0.3    | 200 | Fun                             |
| Atkins et al. 2015 s2     | Task Climate 34       | 0.31   | 200 | Enjoyment                       |
| Atkins et al. 2015 s2     | Task Climate 35       | 0.34   | 200 | Happy                           |
| Atkins et al. 2015 s2     | Task Climate 36       | 0.33   | 200 | Fun                             |
| Atkins et al. 2015 s2     | Task Climate 4        | 0.28   | 205 | Enjoyment                       |
| Atkins et al. 2015 s2     | Task Climate 5        | 0.31   | 205 | Happy                           |
| Atkins et al. 2015 s2     | Task Climate 6        | 0.31   | 205 | Fun                             |
| Balaguer et al. 1999      | Ego Climate 1         | -0.16  | 219 | Satisfaction with results       |
| Balaguer et al. 1999      | Ego Climate 2         | 0.13   | 219 | Satisfaction with level of play |
| Balaguer et al. 1999      | Ego Climate 3         | -0.41  | 219 | Satisfaction with coach         |
| Balaguer et al. 1999      | Task Climate 1        | 0.23   | 219 | Satisfaction with results       |
| Balaguer et al. 1999      | Task Climate 2        | 0.23   | 219 | Satisfaction with level of play |
| Balaguer et al. 1999      | Task Climate 3        | 0.41   | 219 | Satisfaction with coach         |
| Balaguer et al. 2002      | Ego Climate 1         | 0.11   | 181 | Satisfaction with level of play |
| Balaguer et al. 2002      | Task Climate 1        | 0.21   | 181 | Satisfaction with level of play |
| Baric 2011                | Mastery climate 1     | 0.157  | 388 | Pressure/tension                |
| Baric 2011                | Performance climate 1 | -0.129 | 388 | Pressure/tension                |
| Bekiari & Syrmpas 2015    | Mastery climate 1     | 0.835  | 324 | Satisfaction                    |
| Bekiari & Syrmpas 2015    | Performance climate 1 | -0.884 | 324 | Satisfaction                    |
| Blecharzet et al. 2014 s1 | Task-involving 1      | 0.62   | 56  | Satisfaction                    |
| Blecharzet et al. 2014 s2 | Ego-involving 1       | -0.08  | 113 | Satisfaction                    |
| Blecharzet et al. 2014 s2 | Ego-involving 2       | -0.09  | 113 | Satisfaction                    |
| Blecharzet et al. 2014 s2 | Task-involving 1      | 0.25   | 113 | Satisfaction                    |
| Blecharzet et al. 2014 s2 | Task-involving 2      | 0.07   | 113 | Satisfaction                    |
| Boixadós et al. 2004      | Ego Climate 1         | -0.09  | 472 | Satisfaction                    |

|                      |                         |        |     |                                  |
|----------------------|-------------------------|--------|-----|----------------------------------|
| Boixadós et al. 2004 | Ego Climate 2           | 0.05   | 472 | Enjoyment                        |
| Boixadós et al. 2004 | Task Climate 1          | 0.56   | 472 | Satisfaction                     |
| Boixadós et al. 2004 | Task Climate 2          | 0.13   | 472 | Enjoyment                        |
| Bono & Livi 2016     | Ego Climate 1           | -0.123 | 96  | Satisfaction with performance    |
| Bono & Livi 2016     | Ego Climate 2           | 0.174  | 96  | Pressure/tension                 |
| Bono & Livi 2016     | Task Climate 1          | 0.283  | 96  | Satisfaction with performance    |
| Bono & Livi 2016     | Task Climate 2          | -0.209 | 96  | Pressure/tension                 |
| Bortoli et al. 2009  | Mastery climate 1       | 0.235  | 473 | Pleasant states                  |
| Bortoli et al. 2009  | Mastery climate 2       | -0.159 | 473 | Unpleasant states                |
| Bortoli et al. 2009  | Performance climate 1   | -0.095 | 473 | Pleasant states                  |
| Bortoli et al. 2009  | Performance climate 2   | 0.218  | 473 | Unpleasant states                |
| Bortoli et al. 2011  | Ego Climate 1           | -0.083 | 320 | Pleasant psychosocial states     |
| Bortoli et al. 2011  | Mastery climate 1       | 0.205  | 320 | Pleasant psychosocial states     |
| Bortoli et al. 2012  | Mastery climate 1       | 0.24   | 320 | Pleasant states                  |
| Bortoli et al. 2012  | Mastery climate 2       | -0.24  | 320 | Unpleasant states                |
| Bortoli et al. 2012  | Performance climate 1   | -0.02  | 320 | Pleasant states                  |
| Bortoli et al. 2012  | Performance climate 2   | 0.2    | 382 | Unpleasant states                |
| Calvo & Topa 2019    | Ego-oriented climate 1  | -0.05  | 151 | Satisfaction                     |
| Calvo & Topa 2019    | Task-oriented climate 1 | 0.3    | 151 | Satisfaction                     |
| Carr & Wyon 2003     | Mastery climate 1       | 0.01   | 181 | Anxiety somatic                  |
| Carr & Wyon 2003     | Mastery climate 2       | -0.12  | 181 | Anxiety worry                    |
| Carr & Wyon 2003     | Mastery climate 3       | -0.25  | 181 | Anxiety concentration disruption |
| Carr & Wyon 2003     | Performance climate 1   | 0.1    | 181 | Anxiety somatic                  |
| Carr & Wyon 2003     | Performance climate 2   | 0.32   | 181 | Anxiety worry                    |
| Carr & Wyon 2003     | Performance climate 3   | 0.27   | 181 | Anxiety concentration disruption |
| Cecchini et al. 2005 | Performance climate 1   | -0.371 | 82  | Fun fair play                    |
| Cecchini et al. 2005 | Performance climate 2   | 0.445  | 82  | Anxiety error                    |
| Cecchini et al. 2005 | Task Climate 1          | 0.467  | 82  | Fun fair play                    |
| Cecchini et al. 2005 | Task Climate 2          | -0.118 | 82  | Anxiety error                    |
| Cumming et al. 2007  | Ego Climate 1           | -0.23  | 268 | Fun this season                  |
| Cumming et al. 2007  | Task Climate 1          | 0.4    | 268 | Fun this season                  |



|                          |                          |       |     |                                  |
|--------------------------|--------------------------|-------|-----|----------------------------------|
| Curran et al. 2015       | Mastery Climate 2        | 0.54  | 260 | Well-being vigor                 |
| Curran et al. 2015       | Mastery Climate 4        | 0.58  | 260 | Well-being enthusiasm            |
| Curran et al. 2015       | Performance Climate 2    | -0.09 | 260 | Well-being vigor                 |
| Curran et al. 2015       | Performance Climate 4    | -0.16 | 260 | Well-being enthusiasm            |
| Dorsch et al. 2016       | Mastery Climate 3        | 0.19  | 226 | Positive affect                  |
| Dorsch et al. 2016       | Mastery Climate 4        | -0.16 | 226 | Negative affect                  |
| Dorsch et al. 2016       | Mastery Climate 7        | 0.28  | 226 | Positive affect                  |
| Dorsch et al. 2016       | Mastery Climate 8        | 0.09  | 226 | Negative affect                  |
| Dorsch et al. 2016       | Performance Climate 3    | -0.19 | 226 | Positive affect                  |
| Dorsch et al. 2016       | Performance Climate 4    | 0.04  | 226 | Negative affect                  |
| Dorsch et al. 2016       | Performance Climate 7    | 0.01  | 226 | Positive affect                  |
| Dorsch et al. 2016       | Performance Climate 8    | 0.01  | 226 | Negative affect                  |
| Draugelis et al. 2014    | Ego Climate 1            | 0.04  | 182 | Anxiety somatic                  |
| Draugelis et al. 2014    | Ego Climate 2            | 0.17  | 182 | Anxiety worry                    |
| Draugelis et al. 2014    | Ego Climate 3            | 0.17  | 182 | Anxiety concentration disruption |
| Draugelis et al. 2014    | Ego Climate 5            | -0.13 | 182 | Well-being vigor                 |
| Draugelis et al. 2014    | Ego Climate 7            | -0.1  | 182 | Well-being enthusiasm            |
| Draugelis et al. 2014    | Task Climate 1           | -0.12 | 182 | Anxiety somatic                  |
| Draugelis et al. 2014    | Task Climate 2           | -0.04 | 182 | Anxiety worry                    |
| Draugelis et al. 2014    | Task Climate 3           | -0.07 | 182 | Anxiety concentration disruption |
| Draugelis et al. 2014    | Task Climate 5           | 0.34  | 182 | Well-being vigor                 |
| Draugelis et al. 2014    | Task Climate 7           | 0.25  | 182 | Well-being enthusiasm            |
| Eys et al. 2013          | Ego-involving climate 1  | -0.11 | 997 | Enjoyment - self-referenced      |
| Eys et al. 2013          | Ego-involving climate 2  | 0.21  | 997 | Enjoyment - other-referenced     |
| Eys et al. 2013          | Task-involving climate 1 | 0.35  | 997 | Enjoyment - self-referenced      |
| Eys et al. 2013          | Task-involving climate 2 | 0.09  | 997 | Enjoyment - other-referenced     |
| García-Calvo et al. 2014 | Ego Climate 1            | -0.2  | 303 | Satisfaction with participation  |
| García-Calvo et al. 2014 | Ego Climate 2            | -0.06 | 303 | Satisfaction with participation  |
| García-Calvo et al. 2014 | Ego Climate 3            | -0.17 | 303 | Satisfaction with participation  |
| García-Calvo et al. 2014 | Ego Climate 4            | -0.06 | 303 | Satisfaction with participation  |
| García-Calvo et al. 2014 | Task Climate 1           | 0.19  | 303 | Satisfaction with participation  |

|                          |                       |        |      |                                  |
|--------------------------|-----------------------|--------|------|----------------------------------|
| García-Calvo et al. 2014 | Task Climate 2        | 0.05   | 303  | Satisfaction with participation  |
| García-Calvo et al. 2014 | Task Climate 3        | 0.22   | 303  | Satisfaction with participation  |
| García-Calvo et al. 2014 | Task Climate 4        | 0      | 303  | Satisfaction with participation  |
| Garcia-Mas et al. 2011   | Ego Climate 1         | 0.178  | 54   | Anxiety somatic                  |
| Garcia-Mas et al. 2011   | Ego Climate 2         | 0.055  | 54   | Anxiety concentration disruption |
| Garcia-Mas et al. 2011   | Ego Climate 3         | 0.252  | 54   | Anxiety worry                    |
| Garcia-Mas et al. 2011   | Task Climate 1        | -0.13  | 54   | Anxiety worry                    |
| Garcia-Mas et al. 2011   | Task Climate 2        | -0.22  | 54   | Anxiety somatic                  |
| Garcia-Mas et al. 2011   | Task Climate 3        | 0.108  | 54   | Anxiety concentration disruption |
| Gillham et al. 2013      | Ego Climate 1         | -0.13  | 396  | Enjoyment                        |
| Gillham et al. 2013      | Ego Climate 2         | 0.2    | 396  | Boredom                          |
| Gillham et al. 2013      | Mastery climate 1     | 0.36   | 396  | Enjoyment                        |
| Gillham et al. 2013      | Mastery climate 2     | -0.16  | 396  | Boredom                          |
| Gjesdal et al. 2018      | Mastery Climate 1     | 0.58   | 1359 | Enjoyment                        |
| Gjesdal et al. 2018      | Mastery Climate 2     | -0.21  | 1359 | Anxiety                          |
| Gjesdal et al. 2018      | Performance Climate 1 | -0.43  | 1359 | Enjoyment                        |
| Gjesdal et al. 2018      | Performance Climate 2 | 0.38   | 1359 | Anxiety                          |
| Gómez-López et al. 2020  | Ego-involving 1       | 0.14   | 479  | Anxiety somatic                  |
| Gómez-López et al. 2020  | Ego-involving 2       | -0.19  | 479  | Anxiety cognitive                |
| Gómez-López et al. 2020  | Task-involving 1      | -0.07  | 479  | Anxiety somatic                  |
| Gómez-López et al. 2020  | Task-involving 2      | -0.01  | 479  | Anxiety cognitive                |
| Guzmán & García 2014     | Mastery Climate 2     | 0.342  | 303  | Satisfaction/interest            |
| Guzmán & García 2014     | Mastery Climate 3     | 0.149  | 303  | Psychological well-being         |
| Guzmán & García 2014     | Performance Climate 2 | -0.109 | 303  | Satisfaction/interest            |
| Guzmán & García 2014     | Performance Climate 3 | -0.202 | 303  | Psychological well-being         |
| Habeeb et al. 2023       | Mastery Climate 1     | 0.23   | 150  | Vigor                            |
| Habeeb et al. 2023       | Mastery Climate 2     | 0.17   | 150  | Enthusiasm                       |
| Habeeb et al. 2023       | Mastery Climate 3     | 0.27   | 150  | Vigor                            |
| Habeeb et al. 2023       | Mastery Climate 4     | 0.34   | 150  | Enthusiasm                       |
| Habeeb et al. 2023       | Mastery Climate 5     | 0.36   | 150  | Vigor                            |
| Habeeb et al. 2023       | Mastery Climate 6     | 0.34   | 150  | Enthusiasm                       |

|                       |                          |        |     |                                 |
|-----------------------|--------------------------|--------|-----|---------------------------------|
| Habeeb et al. 2023    | Performance Climate 1    | -0.13  | 150 | Vigor                           |
| Habeeb et al. 2023    | Performance Climate 2    | -0.11  | 150 | Enthusiasm                      |
| Habeeb et al. 2023    | Performance Climate 3    | 0.19   | 150 | Vigor                           |
| Habeeb et al. 2023    | Performance Climate 4    | 0.13   | 150 | Enthusiasm                      |
| Habeeb et al. 2023    | Performance Climate 5    | 0.12   | 150 | Vigor                           |
| Habeeb et al. 2023    | Performance Climate 6    | -0.01  | 150 | Enthusiasm                      |
| Harwood et al. 2019   | Ego 1                    | 0.12   | 92  | Vigor                           |
| Harwood et al. 2019   | Ego 2                    | -0.006 | 92  | Vigor                           |
| Harwood et al. 2019   | Ego 3                    | -0.06  | 92  | Enthusiasm                      |
| Harwood et al. 2019   | Ego 4                    | -0.16  | 92  | Enthusiasm                      |
| Harwood et al. 2019   | Task 1                   | 0.26   | 92  | Vigor                           |
| Harwood et al. 2019   | Task 2                   | 0.26   | 92  | Vigor                           |
| Harwood et al. 2019   | Task 3                   | 0.22   | 92  | Vigor                           |
| Harwood et al. 2019   | Task 4                   | 0.19   | 92  | Enthusiasm                      |
| Harwood et al. 2019   | Task 5                   | 0.3    | 92  | Enthusiasm                      |
| Harwood et al. 2019   | Task 6                   | 0.28   | 92  | Enthusiasm                      |
| Haugen et al. 2020    | Mastery climate 1        | 0.271  | 532 | Satisfaction personal treatment |
| Haugen et al. 2020    | Performance climate 1    | -0.299 | 532 | Satisfaction personal treatment |
| Holgado et al. 2010   | Ego-involving 1          | 0.203  | 511 | Satisfaction normative success  |
| Holgado et al. 2010   | Task-involving 1         | 0.185  | 511 | Satisfaction normative success  |
| Jaakkola et al. 2015  | Ego-involving climate 1  | 0.17   | 265 | Enjoyment                       |
| Jaakkola et al. 2015  | Task-involving climate 1 | 0.54   | 265 | Enjoyment                       |
| Kipp & Weiss 2013     | Mastery Climate 6        | 0.23   | 309 | Positive affect                 |
| Kipp & Weiss 2013     | Performance Climate 6    | -0.21  | 309 | Positive affect                 |
| Lemyre et al. 2008    | Mastery Climate 2        | 0.17   | 141 | Satisfaction performance        |
| Lemyre et al. 2008    | Performance Climate 2    | -0.07  | 141 | Satisfaction performance        |
| MacDonald et al. 2011 | Ego 1                    | 0.01   | 510 | Self                            |
| MacDonald et al. 2011 | Ego 2                    | 0.32   | 510 | Other                           |
| MacDonald et al. 2011 | Ego 3                    | 0.04   | 510 | Effort                          |
| MacDonald et al. 2011 | Ego 4                    | 0.01   | 510 | Competitive excitement          |
| MacDonald et al. 2011 | Ego 5                    | -0.03  | 510 | Affiliation with peers          |

|                       |                  |        |     |                             |
|-----------------------|------------------|--------|-----|-----------------------------|
| MacDonald et al. 2011 | Ego 6            | -0.1   | 510 | Positive parent involvement |
| MacDonald et al. 2011 | Task 1           | 0.31   | 510 | Self                        |
| MacDonald et al. 2011 | Task 2           | 0.09   | 510 | Other                       |
| MacDonald et al. 2011 | Task 3           | 0.29   | 510 | Effort                      |
| MacDonald et al. 2011 | Task 4           | 0.33   | 510 | Competitive excitement      |
| MacDonald et al. 2011 | Task 5           | 0.33   | 510 | Affiliation with peers      |
| MacDonald et al. 2011 | Task 6           | 0.34   | 510 | Positive parent involvement |
| Monteiro et al. 2018  | Ego-involving 2  | -0.15  | 799 | Enjoyment                   |
| Monteiro et al. 2018  | Task-involving 2 | 0.159  | 799 | Enjoyment                   |
| Mora et al. 2014 s1   | Ego Climate 1    | 0.15   | 20  | Anxiety worry               |
| Mora et al. 2014 s1   | Ego Climate 2    | 0.577  | 20  | Anxiety somatic             |
| Mora et al. 2014 s1   | Ego Climate 3    | 0.347  | 20  | Lack of concentration       |
| Mora et al. 2014 s1   | Ego Climate 4    | 0.07   | 20  | Anxiety worry               |
| Mora et al. 2014 s1   | Ego Climate 5    | 0.055  | 20  | Anxiety somatic             |
| Mora et al. 2014 s1   | Ego Climate 6    | -0.018 | 20  | Lack of concentration       |
| Mora et al. 2014 s1   | Task Climate 1   | -0.034 | 20  | Anxiety worry               |
| Mora et al. 2014 s1   | Task Climate 2   | -0.31  | 20  | Anxiety somatic             |
| Mora et al. 2014 s1   | Task Climate 3   | -0.154 | 20  | Lack of concentration       |
| Mora et al. 2014 s1   | Task Climate 4   | 0.107  | 20  | Anxiety worry               |
| Mora et al. 2014 s1   | Task Climate 5   | -0.249 | 20  | Anxiety somatic             |
| Mora et al. 2014 s1   | Task Climate 6   | -0.169 | 20  | Lack of concentration       |
| Mora et al. 2014 s2   | Ego Climate 1    | 0.395  | 20  | Anxiety worry               |
| Mora et al. 2014 s2   | Ego Climate 2    | 0.503  | 20  | Anxiety somatic             |
| Mora et al. 2014 s2   | Ego Climate 3    | 0.254  | 20  | Lack of concentration       |
| Mora et al. 2014 s2   | Ego Climate 4    | 0.259  | 20  | Anxiety worry               |
| Mora et al. 2014 s2   | Ego Climate 5    | 0.055  | 20  | Anxiety somatic             |
| Mora et al. 2014 s2   | Ego Climate 6    | -0.255 | 20  | Lack of concentration       |
| Mora et al. 2014 s2   | Task Climate 1   | -0.262 | 20  | Anxiety worry               |
| Mora et al. 2014 s2   | Task Climate 2   | -0.331 | 20  | Anxiety somatic             |
| Mora et al. 2014 s2   | Task Climate 3   | -0.412 | 20  | Lack of concentration       |
| Mora et al. 2014 s2   | Task Climate 4   | -0.337 | 20  | Anxiety worry               |

|                             |                        |        |     |                             |
|-----------------------------|------------------------|--------|-----|-----------------------------|
| Mora et al. 2014 s2         | Task Climate 5         | -0.392 | 20  | Anxiety somatic             |
| Mora et al. 2014 s2         | Task Climate 6         | -0.335 | 20  | Lack of concentration       |
| Morales-Belando et al. 2021 | Ego Climate 1          | -0.21  | 94  | Enjoyment                   |
| Morales-Belando et al. 2021 | Task Climate 1         | 0.08   | 94  | Enjoyment                   |
| Newton et al. 2000          | Ego Climate 1          | -0.31  | 385 | Enjoyment/interest          |
| Newton et al. 2000          | Ego Climate 2          | 0.4    | 385 | Pressure/tension            |
| Newton et al. 2000          | Ego Climate 3          | -0.2   | 385 | Satisfaction team           |
| Newton et al. 2000          | Task Climate 1         | 0.52   | 385 | Enjoyment/interest          |
| Newton et al. 2000          | Task Climate 2         | -0.24  | 385 | Pressure/tension            |
| Newton et al. 2000          | Task Climate 3         | 0.41   | 385 | Satisfaction team           |
| Nordin-Bates et al. 2012    | Ego Climate 1          | 0.13   | 327 | Anxiety total score         |
| Nordin-Bates et al. 2012    | Ego Climate 2          | 0.31   | 327 | Anxiety total score         |
| Nordin-Bates et al. 2012    | Task Climate 1         | 0.01   | 327 | Anxiety total score         |
| Nordin-Bates et al. 2012    | Task Climate 2         | -0.12  | 327 | Anxiety total score         |
| Ntoumanis & Biddle 1998     | Ego Climate 1          | -0.03  | 146 | Anxiety cognitive intensity |
| Ntoumanis & Biddle 1998     | Ego Climate 2          | -0.05  | 146 | Anxiety somatic intensity   |
| Ntoumanis & Biddle 1998     | Mastery Climate 1      | -0.09  | 146 | Anxiety cognitive intensity |
| Ntoumanis & Biddle 1998     | Mastery Climate 2      | -0.02  | 146 | Anxiety somatic intensity   |
| Núñez et al. 2011           | Cooperative learning 4 | 0.3    | 399 | Positive emotions           |
| Núñez et al. 2011           | Effort improvement 4   | 0.28   | 399 | Positive emotions           |
| Núñez et al. 2011           | Important role 4       | 0.23   | 399 | Positive emotions           |
| O'Rourke et al. 2011        | Mastery climate 1      | -0.24  | 307 | Anxiety                     |
| O'Rourke et al. 2011        | Mastery climate 2      | -0.18  | 307 | Anxiety                     |
| O'Rourke et al. 2011        | Mastery climate 3      | -0.24  | 307 | Anxiety                     |
| O'Rourke et al. 2011        | Performance climate 1  | 0.34   | 307 | Anxiety                     |
| O'Rourke et al. 2011        | Performance climate 2  | 0.3    | 307 | Anxiety                     |
| O'Rourke et al. 2011        | Performance climate 3  | 0.24   | 307 | Anxiety                     |
| O'Rourke et al. 2014        | Ego climate 1          | 0.24   | 228 | Anxiety                     |
| O'Rourke et al. 2014        | Ego climate 2          | 0.19   | 228 | Anxiety                     |
| O'Rourke et al. 2014        | Mastery climate 1      | -0.24  | 228 | Anxiety                     |
| O'Rourke et al. 2014        | Mastery climate 2      | -0.16  | 228 | Anxiety                     |

|                            |                   |        |     |                      |
|----------------------------|-------------------|--------|-----|----------------------|
| Papaioannou et al. 2008    | Mastery climate 1 | 0.33   | 863 | Satisfaction         |
| Papaioannou et al. 2008    | Mastery climate 2 | 0.31   | 863 | Satisfaction         |
| Papaioannou et al. 2008    | Mastery climate 3 | 0.29   | 863 | Satisfaction         |
| Pensgaard & Roberts 2000   | Ego Climate 1     | 0.0289 | 69  | Distress total score |
| Pensgaard & Roberts 2000   | Mastery climate 1 | 0      | 69  | Distress total score |
| Pineda-Espejel et al. 2015 | Ego climate 1     | 0.14   | 211 | Anxiety cognitive    |
| Pineda-Espejel et al. 2015 | Ego climate 2     | 0.13   | 211 | Anxiety somatic      |
| Pineda-Espejel et al. 2015 | Task climate 1    | -0.07  | 211 | Anxiety cognitive    |
| Pineda-Espejel et al. 2015 | Task climate 2    | -0.08  | 211 | Anxiety somatic      |
| Pineda-Espejel et al. 2021 | Task climate 1    | -0.08  | 217 | Anxiety cognitive    |
| Pineda-Espejel et al. 2021 | Task climate 2    | -0.04  | 217 | Anxiety somatic      |
| Quested & Duda 2009        | Ego climate 5     | -0.33  | 59  | Positive affect      |
| Quested & Duda 2009        | Ego climate 6     | 0.37   | 59  | Negative affect      |
| Quested & Duda 2009        | Task climate 5    | 0.48   | 59  | Positive affect      |
| Quested & Duda 2009        | Task climate 6    | -0.47  | 59  | Negative affect      |
| Quested & Duda 2010        | Ego-involving 4   | -0.25  | 392 | Positive affect      |
| Quested & Duda 2010        | Ego-involving 5   | 0.33   | 392 | Negative affect      |
| Quested & Duda 2010        | Task-involving 4  | 0.41   | 392 | Positive affect      |
| Quested & Duda 2010        | Task-involving 5  | -0.29  | 392 | Negative affect      |
| Robazza et al. 2021        | Ego Climate 1     | -0.383 | 302 | Pleasant emotions    |
| Robazza et al. 2021        | Ego Climate 2     | 0.176  | 302 | Anxiety              |
| Robazza et al. 2021        | Mastery Climate 1 | 0.409  | 302 | Pleasant emotions    |
| Robazza et al. 2021        | Mastery Climate 2 | -0.228 | 302 | Anxiety              |
| Robazza et al. 2022        | Ego Climate 1     | 0.06   | 459 | Anxiety              |
| Robazza et al. 2022        | Ego Climate 2     | 0.29   | 459 | Dejection            |
| Robazza et al. 2022        | Ego Climate 3     | 0.33   | 459 | Anger                |
| Robazza et al. 2022        | Ego Climate 4     | -0.02  | 459 | Excitement           |
| Robazza et al. 2022        | Ego Climate 5     | -0.08  | 459 | Happiness            |
| Robazza et al. 2022        | Ego Climate 6     | -0.27  | 459 | Emotions             |
| Robazza et al. 2022        | Ego Climate 7     | -0.06  | 459 | Anxiety              |
| Robazza et al. 2022        | Mastery Climate 1 | -0.01  | 459 | Anxiety              |

|                     |                           |       |     |                           |
|---------------------|---------------------------|-------|-----|---------------------------|
| Robazza et al. 2022 | Mastery Climate 2         | -0.15 | 459 | Dejection                 |
| Robazza et al. 2022 | Mastery Climate 3         | -0.13 | 459 | Anger                     |
| Robazza et al. 2022 | Mastery Climate 4         | 0.22  | 459 | Excitement                |
| Robazza et al. 2022 | Mastery Climate 5         | 0.25  | 459 | Happiness                 |
| Robazza et al. 2022 | Mastery Climate 6         | 0.33  | 459 | Emotions                  |
| Robazza et al. 2022 | Mastery Climate 7         | 0.15  | 459 | Anxiety                   |
| Ruiz et al. 2017    | Ego-involving climate 1   | -0.09 | 494 | Pleasant states intensity |
| Ruiz et al. 2017    | Ego-involving climate 10  | -0.09 | 494 | Pleasant states impact    |
| Ruiz et al. 2017    | Ego-involving climate 11  | 0     | 494 | Anxiety impact            |
| Ruiz et al. 2017    | Ego-involving climate 12  | 0.08  | 494 | Anger impact              |
| Ruiz et al. 2017    | Ego-involving climate 2   | 0.13  | 494 | Anxiety intensity         |
| Ruiz et al. 2017    | Ego-involving climate 3   | 0.11  | 494 | Anger intensity           |
| Ruiz et al. 2017    | Ego-involving climate 4   | 0.01  | 494 | Pleasant states intensity |
| Ruiz et al. 2017    | Ego-involving climate 5   | 0.2   | 494 | Anxiety intensity         |
| Ruiz et al. 2017    | Ego-involving climate 6   | 0.25  | 494 | Anger intensity           |
| Ruiz et al. 2017    | Ego-involving climate 7   | -0.07 | 494 | Pleasant states impact    |
| Ruiz et al. 2017    | Ego-involving climate 8   | -0.09 | 494 | Anxiety impact            |
| Ruiz et al. 2017    | Ego-involving climate 9   | 0     | 494 | Anger impact              |
| Ruiz et al. 2017    | Task-involving climate 1  | 0.06  | 494 | Pleasant states intensity |
| Ruiz et al. 2017    | Task-involving climate 10 | 0.08  | 494 | Pleasant states impact    |
| Ruiz et al. 2017    | Task-involving climate 11 | 0     | 494 | Anxiety impact            |
| Ruiz et al. 2017    | Task-involving climate 12 | -0.13 | 494 | Anger impact              |
| Ruiz et al. 2017    | Task-involving climate 2  | -0.15 | 494 | Anxiety intensity         |
| Ruiz et al. 2017    | Task-involving climate 3  | 0.07  | 494 | Anger intensity           |
| Ruiz et al. 2017    | Task-involving climate 4  | 0.03  | 494 | Pleasant states intensity |
| Ruiz et al. 2017    | Task-involving climate 5  | -0.19 | 494 | Anxiety intensity         |
| Ruiz et al. 2017    | Task-involving climate 6  | -0.24 | 494 | Anger intensity           |
| Ruiz et al. 2017    | Task-involving climate 7  | 0.11  | 494 | Pleasant states impact    |
| Ruiz et al. 2017    | Task-involving climate 8  | 0.07  | 494 | Anxiety impact            |
| Ruiz et al. 2017    | Task-involving climate 9  | 0.18  | 494 | Anger impact              |
| Ruiz et al. 2019    | Ego climate 1             | -0.08 | 217 | Pleasant states intensity |

|                  |                 |       |     |                                 |
|------------------|-----------------|-------|-----|---------------------------------|
| Ruiz et al. 2019 | Ego climate 10  | 0.2   | 217 | Anxiety intensity dysfunctional |
| Ruiz et al. 2019 | Ego climate 11  | 0.17  | 217 | Anger intensity functional      |
| Ruiz et al. 2019 | Ego climate 12  | 0.32  | 217 | Anger intensity dysfunctional   |
| Ruiz et al. 2019 | Ego climate 13  | -0.16 | 217 | Pleasant states impact          |
| Ruiz et al. 2019 | Ego climate 14  | 0.12  | 217 | Anxiety intensity dysfunctional |
| Ruiz et al. 2019 | Ego climate 15  | -0.05 | 217 | Anger impact functional         |
| Ruiz et al. 2019 | Ego climate 16  | 0.14  | 217 | Anger impact dysfunctional      |
| Ruiz et al. 2019 | Ego climate 2   | 0.19  | 217 | Anxiety intensity dysfunctional |
| Ruiz et al. 2019 | Ego climate 3   | 0.12  | 217 | Anger intensity functional      |
| Ruiz et al. 2019 | Ego climate 4   | 0.21  | 217 | Anger intensity dysfunctional   |
| Ruiz et al. 2019 | Ego climate 5   | -0.08 | 217 | Pleasant states impact          |
| Ruiz et al. 2019 | Ego climate 6   | -0.08 | 217 | Anxiety intensity dysfunctional |
| Ruiz et al. 2019 | Ego climate 7   | -0.07 | 217 | Anger impact functional         |
| Ruiz et al. 2019 | Ego climate 8   | 0.14  | 217 | Anger impact dysfunctional      |
| Ruiz et al. 2019 | Ego climate 9   | -0.08 | 217 | Pleasant states intensity       |
| Ruiz et al. 2019 | Task climate 1  | 0.08  | 217 | Pleasant states intensity       |
| Ruiz et al. 2019 | Task climate 10 | -0.19 | 217 | Anxiety intensity dysfunctional |
| Ruiz et al. 2019 | Task climate 11 | -0.1  | 217 | Anger intensity functional      |
| Ruiz et al. 2019 | Task climate 12 | -0.19 | 217 | Anger intensity dysfunctional   |
| Ruiz et al. 2019 | Task climate 13 | 0.15  | 217 | Pleasant states impact          |
| Ruiz et al. 2019 | Task climate 14 | -0.09 | 217 | Anxiety intensity dysfunctional |
| Ruiz et al. 2019 | Task climate 15 | 0.12  | 217 | Anger impact functional         |
| Ruiz et al. 2019 | Task climate 16 | -0.18 | 217 | Anger impact dysfunctional      |
| Ruiz et al. 2019 | Task climate 2  | -0.21 | 217 | Anxiety intensity dysfunctional |
| Ruiz et al. 2019 | Task climate 3  | 0.07  | 217 | Anger intensity functional      |
| Ruiz et al. 2019 | Task climate 4  | -0.22 | 217 | Anger intensity dysfunctional   |
| Ruiz et al. 2019 | Task climate 5  | 0.11  | 217 | Pleasant states impact          |
| Ruiz et al. 2019 | Task climate 6  | -0.06 | 217 | Anxiety intensity dysfunctional |
| Ruiz et al. 2019 | Task climate 7  | 0.28  | 217 | Anger impact functional         |
| Ruiz et al. 2019 | Task climate 8  | -0.14 | 217 | Anger impact dysfunctional      |
| Ruiz et al. 2019 | Task climate 9  | 0.1   | 217 | Pleasant states intensity       |



|                         |                          |        |     |                     |
|-------------------------|--------------------------|--------|-----|---------------------|
| Santos-Rosa et al. 2022 | Ego-involving 1          | -0.06  | 258 | Positivity          |
| Santos-Rosa et al. 2022 | Ego-involving 2          | 0.24   | 258 | Anxiety somatic     |
| Santos-Rosa et al. 2022 | Ego-involving 3          | 0.17   | 258 | Anxiety worry       |
| Santos-Rosa et al. 2022 | Task-involving 1         | 0.26   | 258 | Positivity          |
| Santos-Rosa et al. 2022 | Task-involving 2         | -0.04  | 258 | Anxiety somatic     |
| Santos-Rosa et al. 2022 | Task-involving 3         | -0.08  | 258 | Anxiety worry       |
| Sari & Bizan 2022       | Ego-involving Climate 2  | -0.1   | 180 | Enthusiasm          |
| Sari & Bizan 2022       | Ego-involving Climate 1  | -0.07  | 180 | Vigor               |
| Sari & Bizan 2022       | Task-involving Climate 1 | 0.36   | 180 | Vigor               |
| Sari & Bizan 2022       | Task-involving Climate 2 | 0.42   | 180 | Enthusiasm          |
| Scott et al. 2021       | Ego-involving 1          | -0.12  | 109 | Hope                |
| Scott et al. 2021       | Ego-involving 2          | -0.14  | 109 | Happiness           |
| Scott et al. 2021       | Task-involving 1         | 0.26   | 109 | Hope                |
| Scott et al. 2021       | Task-involving 2         | 0.18   | 109 | Happiness           |
| Sheehan et al. 2018a    | Ego Climate w1 1         | 0.407  | 38  | Total Mood Score    |
| Sheehan et al. 2018a    | Ego Climate w1 2         | 0.4    | 38  | Depression symptoms |
| Sheehan et al. 2018a    | Ego Climate w1 4         | 0.452  | 38  | Anxiety Trait       |
| Sheehan et al. 2018a    | Ego Climate w2 1         | 0.404  | 38  | Total Mood Score    |
| Sheehan et al. 2018a    | Ego Climate w2 2         | 0.218  | 38  | Depression symptoms |
| Sheehan et al. 2018a    | Ego Climate w2 4         | 0.52   | 38  | Anxiety Trait       |
| Sheehan et al. 2018a    | Task Climate w1 1        | -0.018 | 38  | Total Mood Score    |
| Sheehan et al. 2018a    | Task Climate w1 2        | -0.261 | 38  | Depression symptoms |
| Sheehan et al. 2018a    | Task Climate w1 4        | -0.48  | 38  | Anxiety Trait       |
| Sheehan et al. 2018a    | Task Climate w2 1        | -0.242 | 38  | Total Mood Score    |
| Sheehan et al. 2018a    | Task Climate w2 2        | -0.153 | 38  | Depression symptoms |
| Sheehan et al. 2018a    | Task Climate w2 4        | -0.488 | 38  | Anxiety Trait       |
| Sheehan et al. 2018b    | Ego Climate 4            | 0.086  | 215 | Total Mood Score    |
| Sheehan et al. 2018b    | Ego Climate 5            | 0.174  | 215 | Depression symptoms |
| Sheehan et al. 2018b    | Ego Climate 7            | 0.183  | 215 | Anxiety Trait       |
| Sheehan et al. 2018b    | Task Climate 4           | -0.131 | 215 | Total Mood Score    |
| Sheehan et al. 2018b    | Task Climate 5           | -0.103 | 215 | Depression symptoms |

|                                 |                           |        |      |                                  |
|---------------------------------|---------------------------|--------|------|----------------------------------|
| Sheehan et al. 2018b            | Task Climate 7            | -0.242 | 215  | Anxiety Trait                    |
| Smith, Balaguer et al. 2006     | Ego-involving 1           | -0.08  | 223  | Enjoyment soccer                 |
| Smith, Balaguer et al. 2006     | Ego-involving 2           | 0      | 223  | Satisfaction performance         |
| Smith, Balaguer et al. 2006     | Ego-involving 3           | -0.13  | 223  | Satisfaction team                |
| Smith, Balaguer et al. 2006     | Task-involving 1          | 0.36   | 223  | Enjoyment soccer                 |
| Smith, Balaguer et al. 2006     | Task-involving 2          | 0.23   | 223  | Satisfaction performance         |
| Smith, Balaguer et al. 2006     | Task-involving 3          | 0.24   | 223  | Satisfaction team                |
| Smith, Smoll et al. 2006        | Ego climate 1             | 0.3    | 572  | Anxiety somatic                  |
| Smith, Smoll et al. 2006        | Ego climate 2             | 0.28   | 572  | Anxiety worry                    |
| Smith, Smoll et al. 2006        | Ego climate 3             | 0.35   | 572  | Anxiety concentration disruption |
| Smith, Smoll et al. 2006        | Mastery climate 1         | -0.28  | 572  | Anxiety somatic                  |
| Smith, Smoll et al. 2006        | Mastery climate 2         | -0.29  | 572  | Anxiety worry                    |
| Smith, Smoll et al. 2006        | Mastery climate 3         | -0.32  | 572  | Anxiety concentration disruption |
| Solstad & Lemyre 2014           | Mastery Climate 1         | 0.405  | 202  | Well-being subjective            |
| Solstad & Lemyre 2014           | Performance Climate 1     | -0.18  | 202  | Well-being subjective            |
| Stark & Newton 2014             | Ego Climate 1             | -0.119 | 83   | Positive affect                  |
| Stark & Newton 2014             | Ego Climate 2             | 0.456  | 83   | Negative affect                  |
| Stark & Newton 2014             | Task Climate 1            | 0.487  | 83   | Positive affect                  |
| Stark & Newton 2014             | Task Climate 2            | -0.249 | 83   | Negative affect                  |
| Steffen et al. 2009             | Mastery climate 1         | 0.07   | 1430 | Anxiety somatic                  |
| Steffen et al. 2009             | Mastery climate 2         | 0.02   | 1430 | Anxiety worry                    |
| Steffen et al. 2009             | Mastery climate 3         | -0.05  | 1430 | Anxiety concentration disruption |
| Steffen et al. 2009             | Performance Climate 1     | 0.21   | 1430 | Anxiety somatic                  |
| Steffen et al. 2009             | Performance Climate 2     | 0.29   | 1430 | Anxiety worry                    |
| Steffen et al. 2009             | Performance Climate 3     | 0.29   | 1430 | Anxiety concentration disruption |
| Tamminen et al. 2016            | Ego Climate 1             | -0.04  | 451  | Enjoyment                        |
| Tamminen et al. 2016            | Task Climate 1            | 0.5    | 451  | Enjoyment                        |
| Trbojevic Jovic & Petrovic 2021 | Task climate 2            | 0.205  | 383  | Enjoyment                        |
| Trbojevic Jovic et al. 2020     | Punishment for Mistakes 1 | -0.14  | 117  | Satisfaction                     |
| Trbojevic Jovic et al. 2020     | Task climate 1            | 0.61   | 117  | Satisfaction                     |
| Trbojevic Jovic et al. 2020     | Unequal Recognition 1     | -0.38  | 117  | Satisfaction                     |

|                     |                          |       |     |                                |
|---------------------|--------------------------|-------|-----|--------------------------------|
| Trenz & Zusho 2011  | Mastery climate 1        | 0.6   | 119 | Satisfaction swim              |
| Trenz & Zusho 2011  | Performance climate 1    | -0.38 | 119 | Satisfaction swim              |
| Vazou et al. 2006   | Mastery climate 2        | 0.39  | 493 | Enjoyment                      |
| Vazou et al. 2006   | Mastery climate 3        | -0.03 | 493 | Anxiety trait                  |
| Vazou et al. 2006   | Mastery climate 5        | 0.31  | 493 | Enjoyment                      |
| Vazou et al. 2006   | Mastery climate 6        | -0.06 | 493 | Anxiety trait                  |
| Vazou et al. 2006   | Performance climate 2    | -0.16 | 493 | Enjoyment                      |
| Vazou et al. 2006   | Performance climate 3    | 0.15  | 493 | Anxiety trait                  |
| Vazou et al. 2006   | Performance climate 5    | -0.14 | 493 | Enjoyment                      |
| Vazou et al. 2006   | Performance climate 6    | 0.21  | 493 | Anxiety trait                  |
| Vosloo et al. 2009  | Mastery climate 1        | 0.269 | 151 | Anxiety cognitive facilitative |
| Vosloo et al. 2009  | Mastery climate 2        | 0.275 | 151 | Anxiety somatic facilitative   |
| Walling et al. 1993 | Mastery Climate 1        | -0.18 | 169 | Worry performance              |
| Walling et al. 1993 | Mastery Climate 2        | 0.39  | 169 | Satisfaction team              |
| Walling et al. 1993 | Performance Climate 1    | 0.39  | 169 | Worry performance              |
| Walling et al. 1993 | Performance Climate 2    | -0.26 | 169 | Satisfaction team              |
| Weiss 2015          | Mastery Climate 1        | 0.38  | 491 | Enjoyment                      |
| Weiss 2015          | Performance Climate 1    | -0.19 | 491 | Enjoyment                      |
| Weiss et al. 2009   | Mastery Climate 1        | 0.22  | 141 | Enjoyment                      |
| Weiss et al. 2009   | Performance Climate 1    | -0.2  | 141 | Enjoyment                      |
| Wu et al. 2021      | Ego climate 1            | 0.35  | 685 | Depression                     |
| Wu et al. 2021      | Ego climate 2            | 0.25  | 685 | Anxiety                        |
| Wu et al. 2021      | Task climate 1           | -0.43 | 685 | Depression                     |
| Wu et al. 2021      | Task climate 2           | -0.32 | 685 | Anxiety                        |
| Zanatta et al. 2018 | Ego-involving climate 1  | -0.03 | 824 | Enjoyment                      |
| Zanatta et al. 2018 | Task-involving climate 1 | 0.39  | 824 | Enjoyment                      |

**Supplement Figures.** Remove-one study figures.

# Meta Analysis

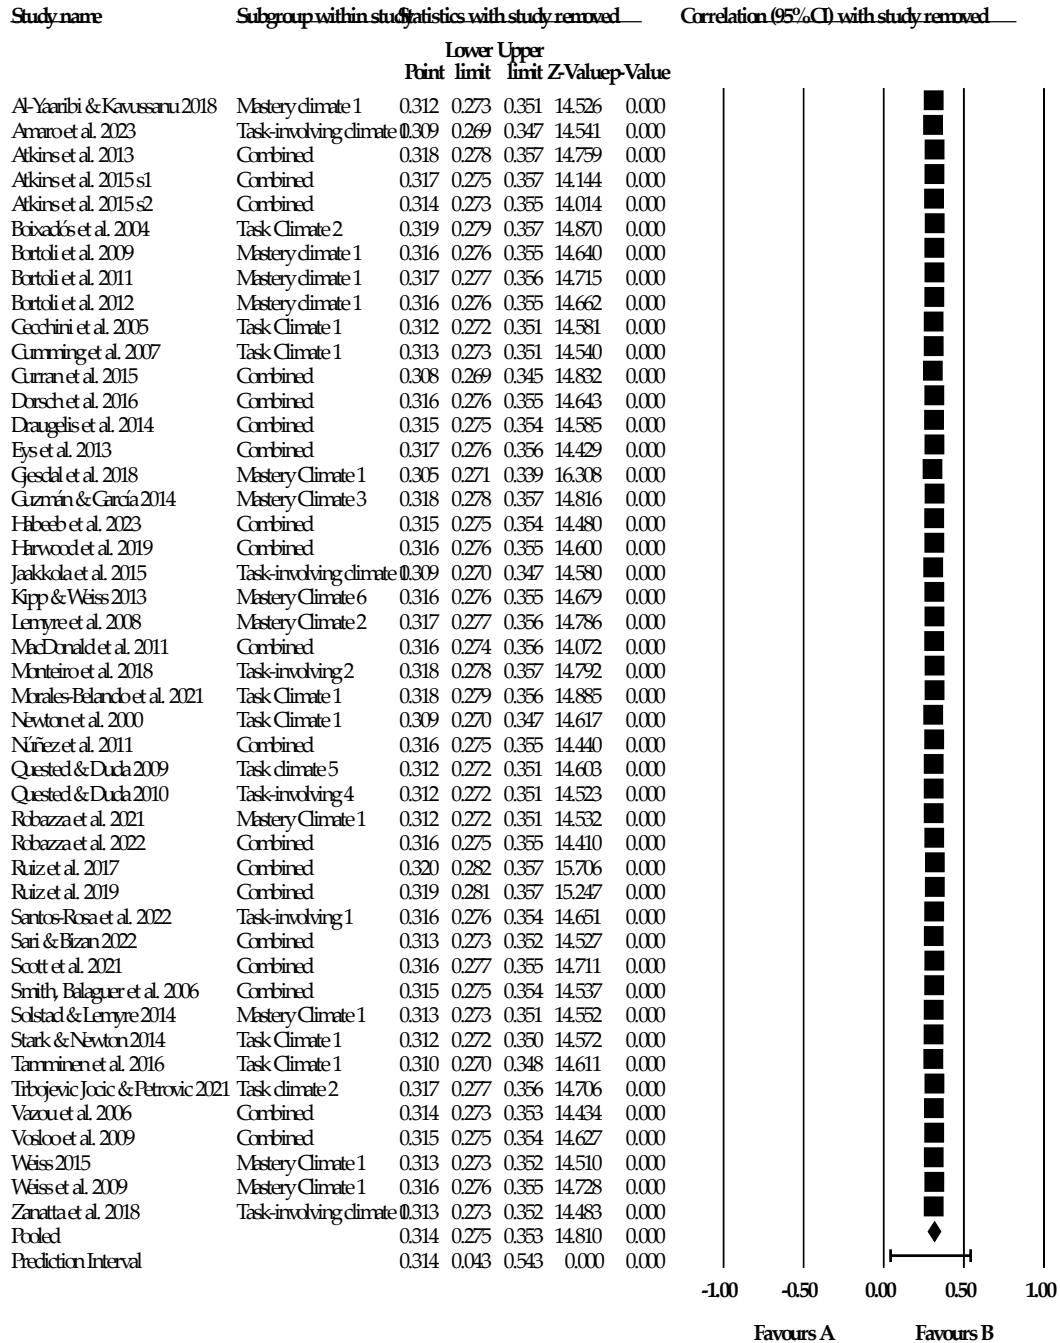

**Supp Figure 1.** Remove-one study results for task/mastery climate and positive affect/mood.

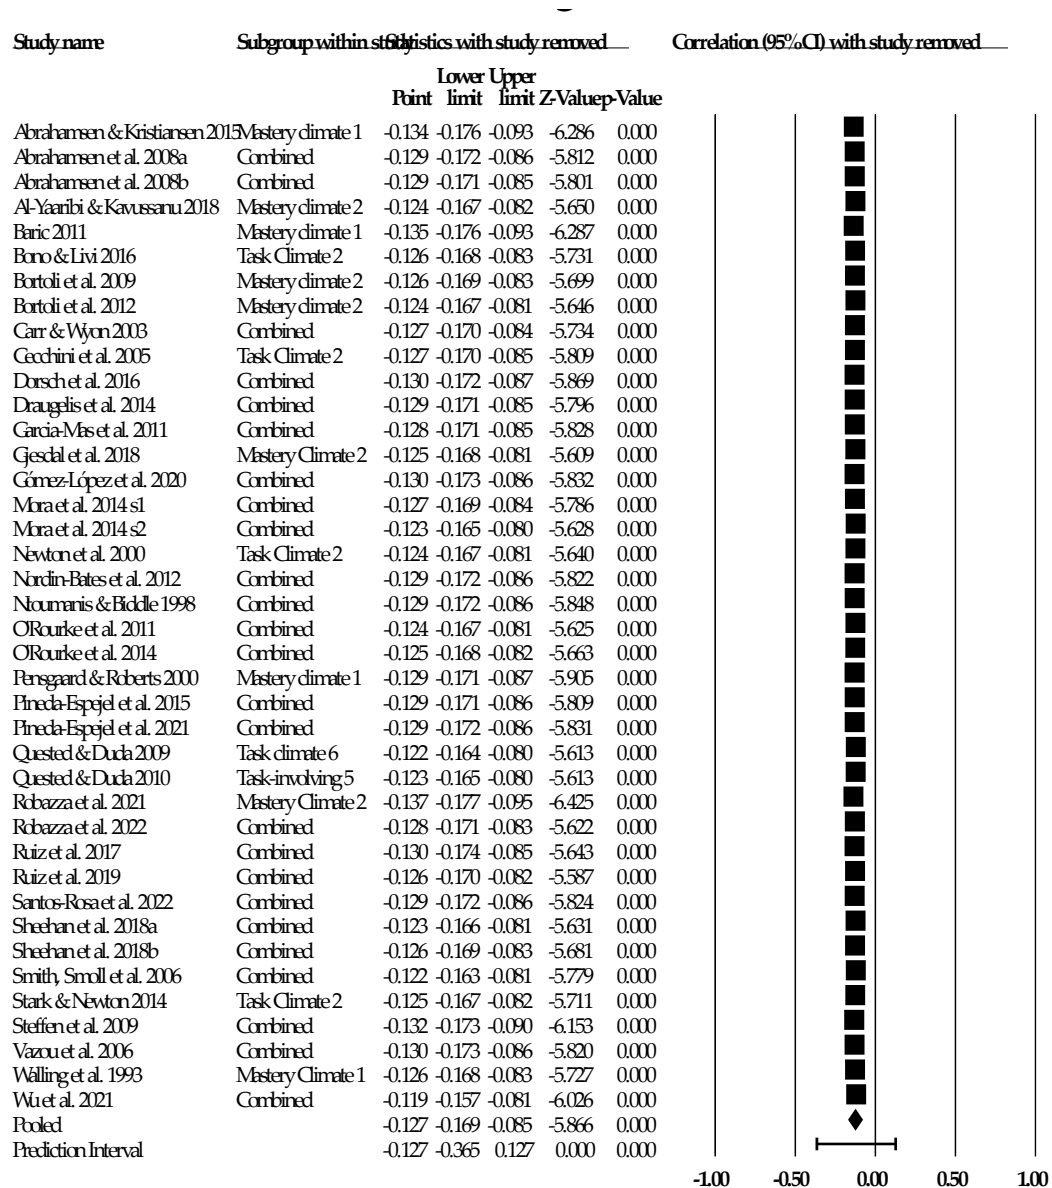

**Supp Figure 2.** Remove-one study results for task/mastery climate and negative affect/mood.

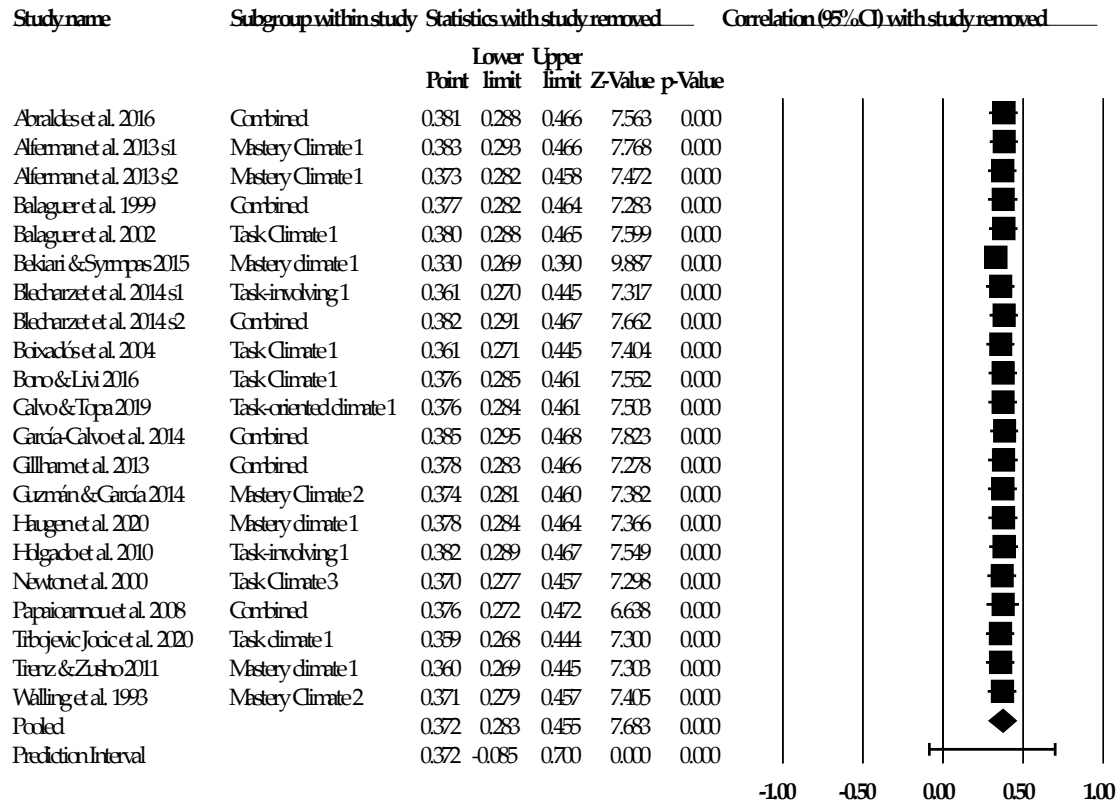

**Supp Figure 3.** Remove-one study results for task/mastery climate and satisfaction.

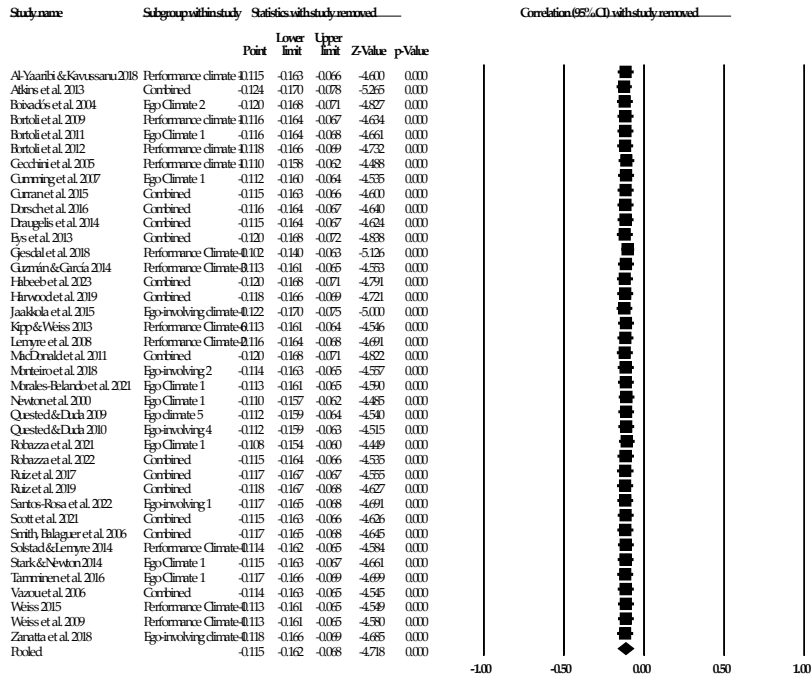

**Supp Figure 4.** Remove-one study results for ego/performance climate and positive affect/mood.



# Meta Analysis

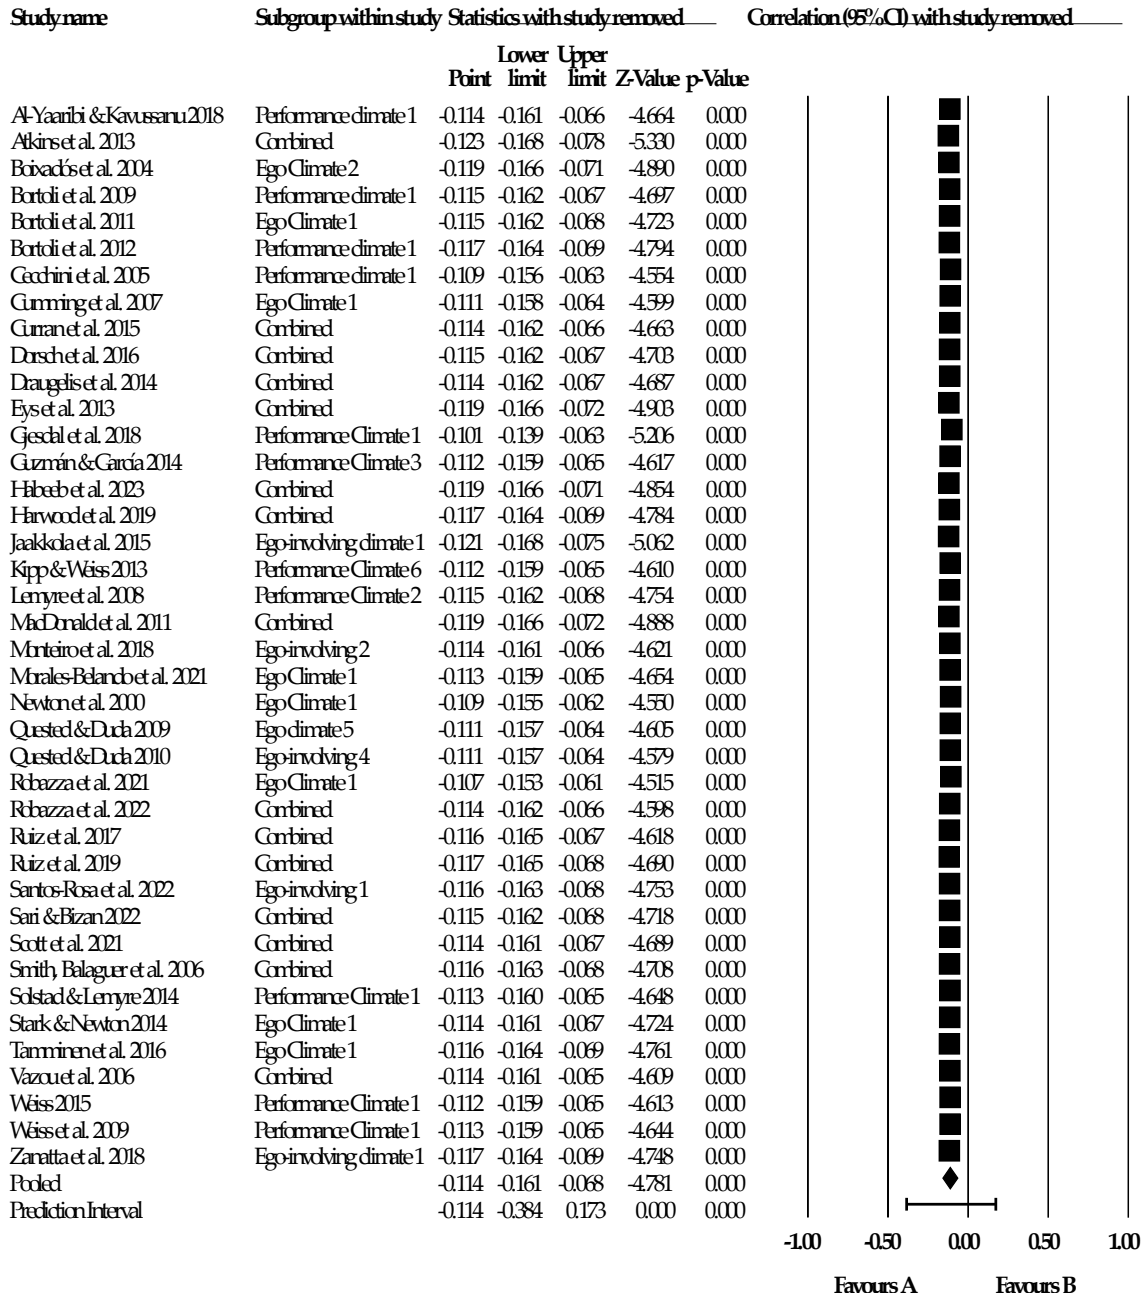

**Supp Figure 5.** Remove-one study results for ego/performance climate and negative affect/mood.

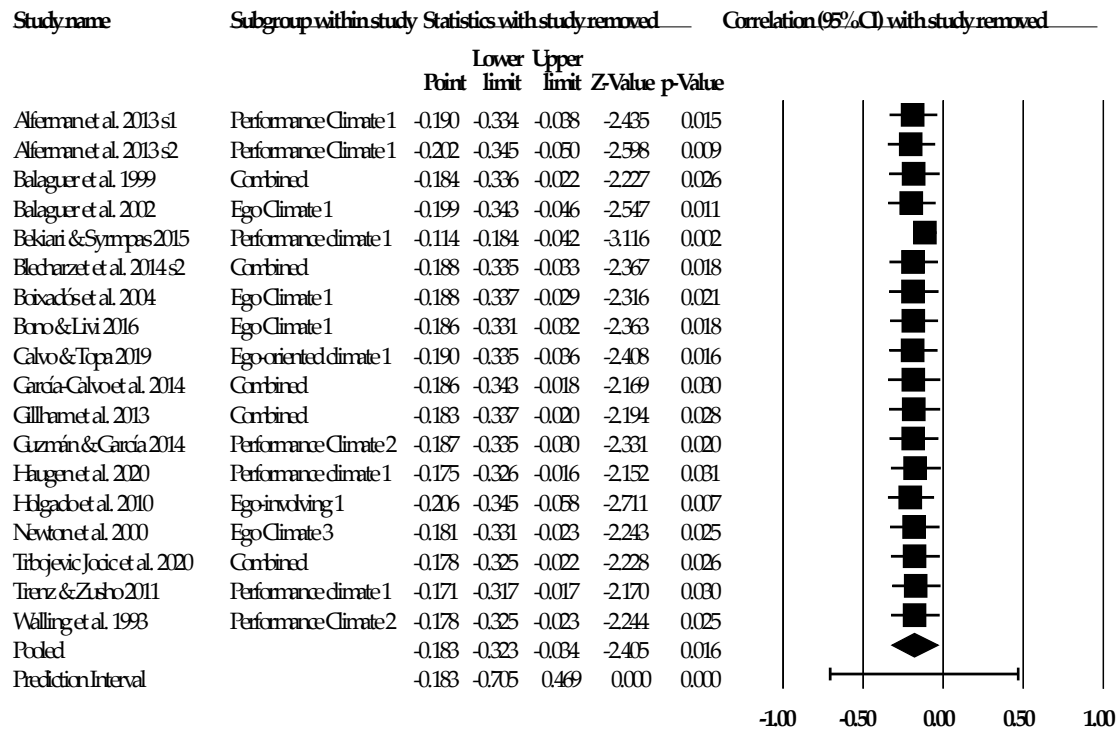

**Supp Figure 6.** Remove-one study results for ego/performance climate and satisfaction.

**Supplement Figures.** Cumulative analysis by year figures.

# Meta Analysis

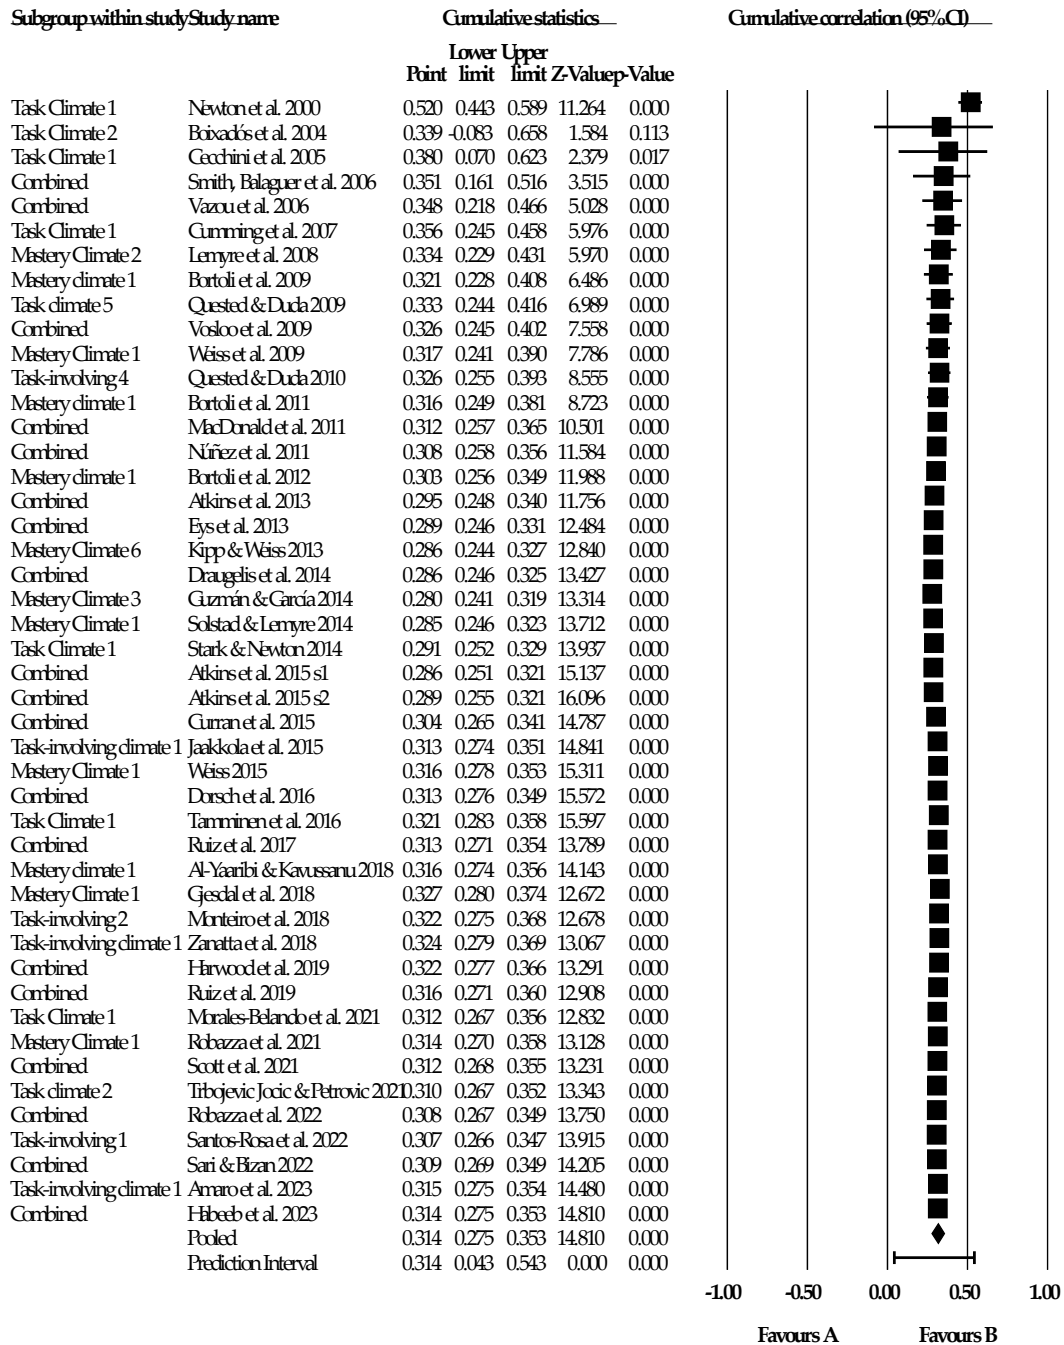

Supp Figure 8. Cumulative analysis by year for task/mastery climate and positive affect/mood.

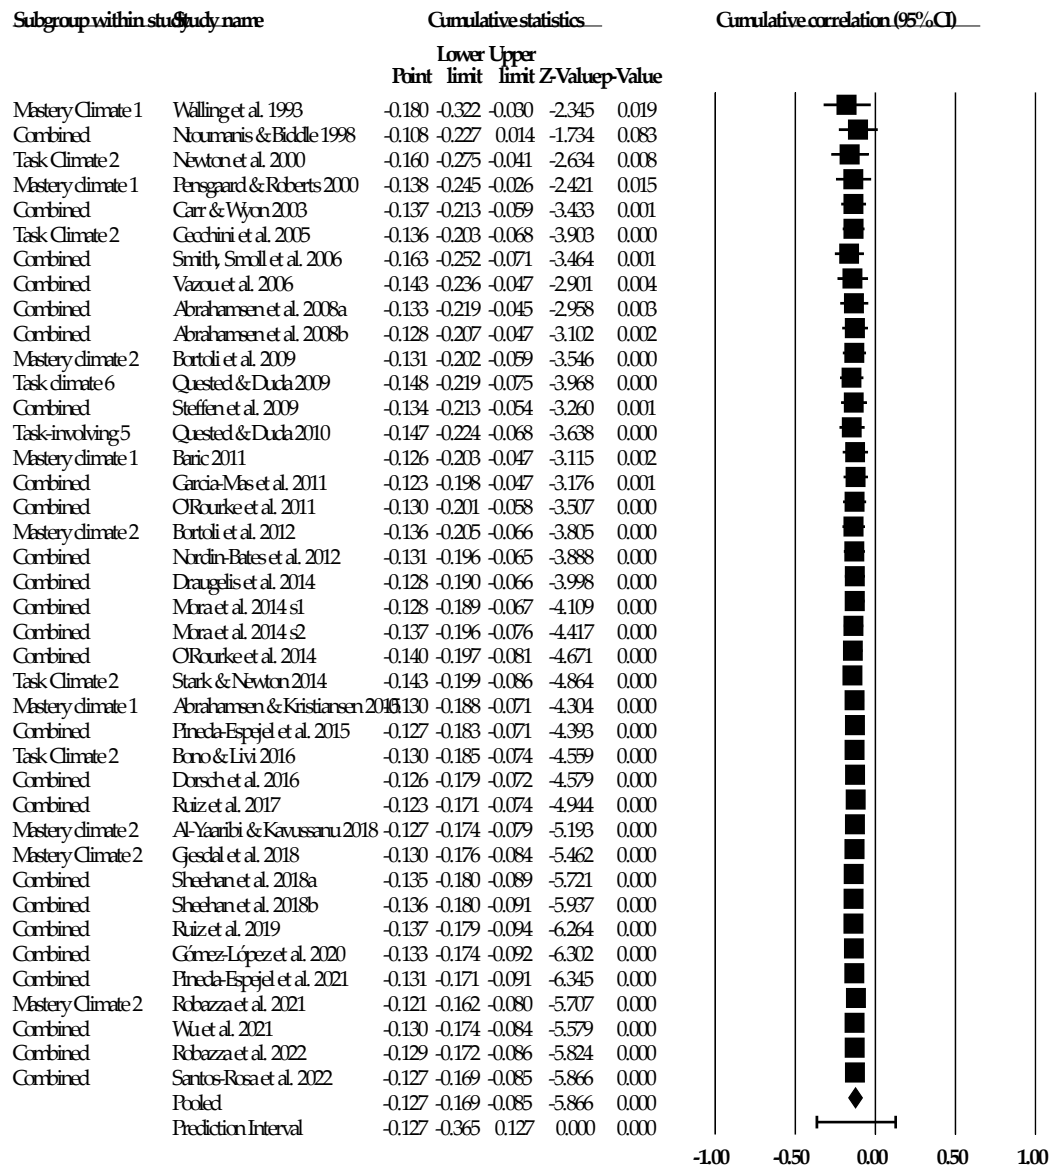

Supp Figure 9. Cumulative analysis by year for task/mastery climate and negative affect/mood.

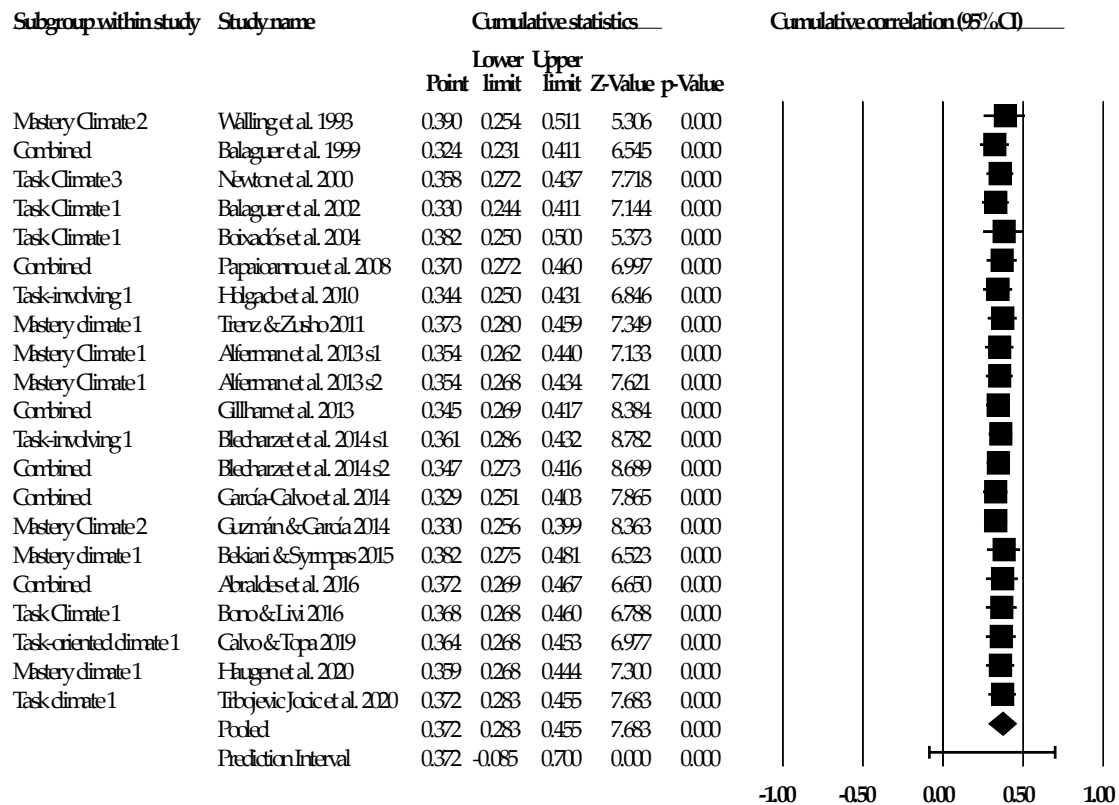

**Supp Figure 10.** Cumulative analysis by year for task/mastery climate and satisfaction.

# Meta Analysis

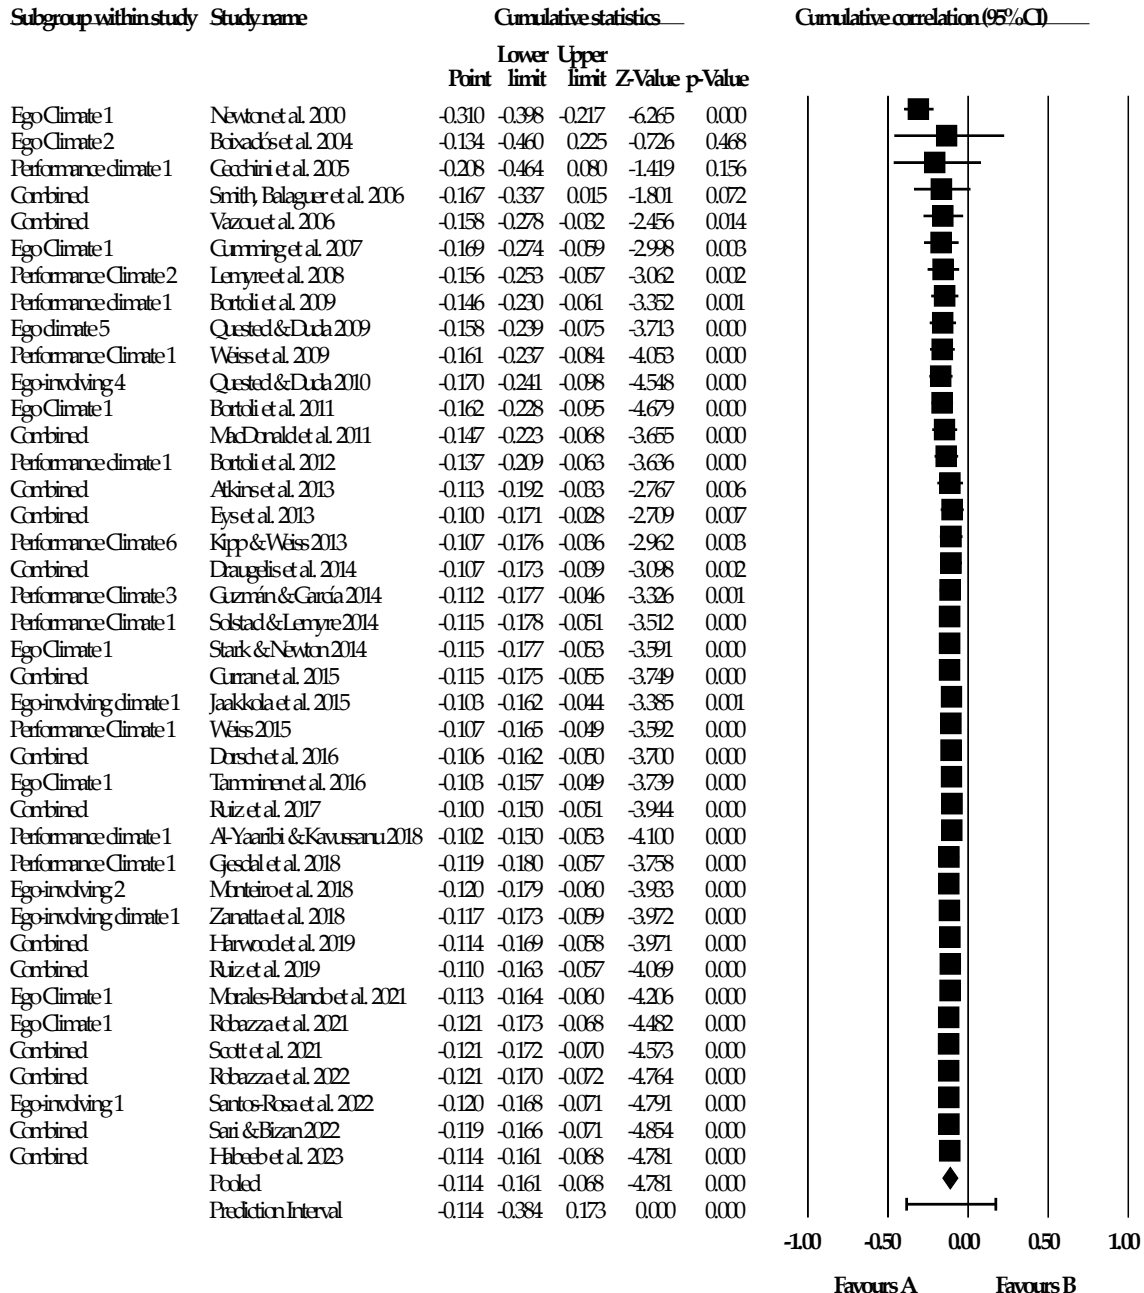

**Supp Figure 11.** Cumulative analysis by year for ego/performance climate and positive affect/mood.

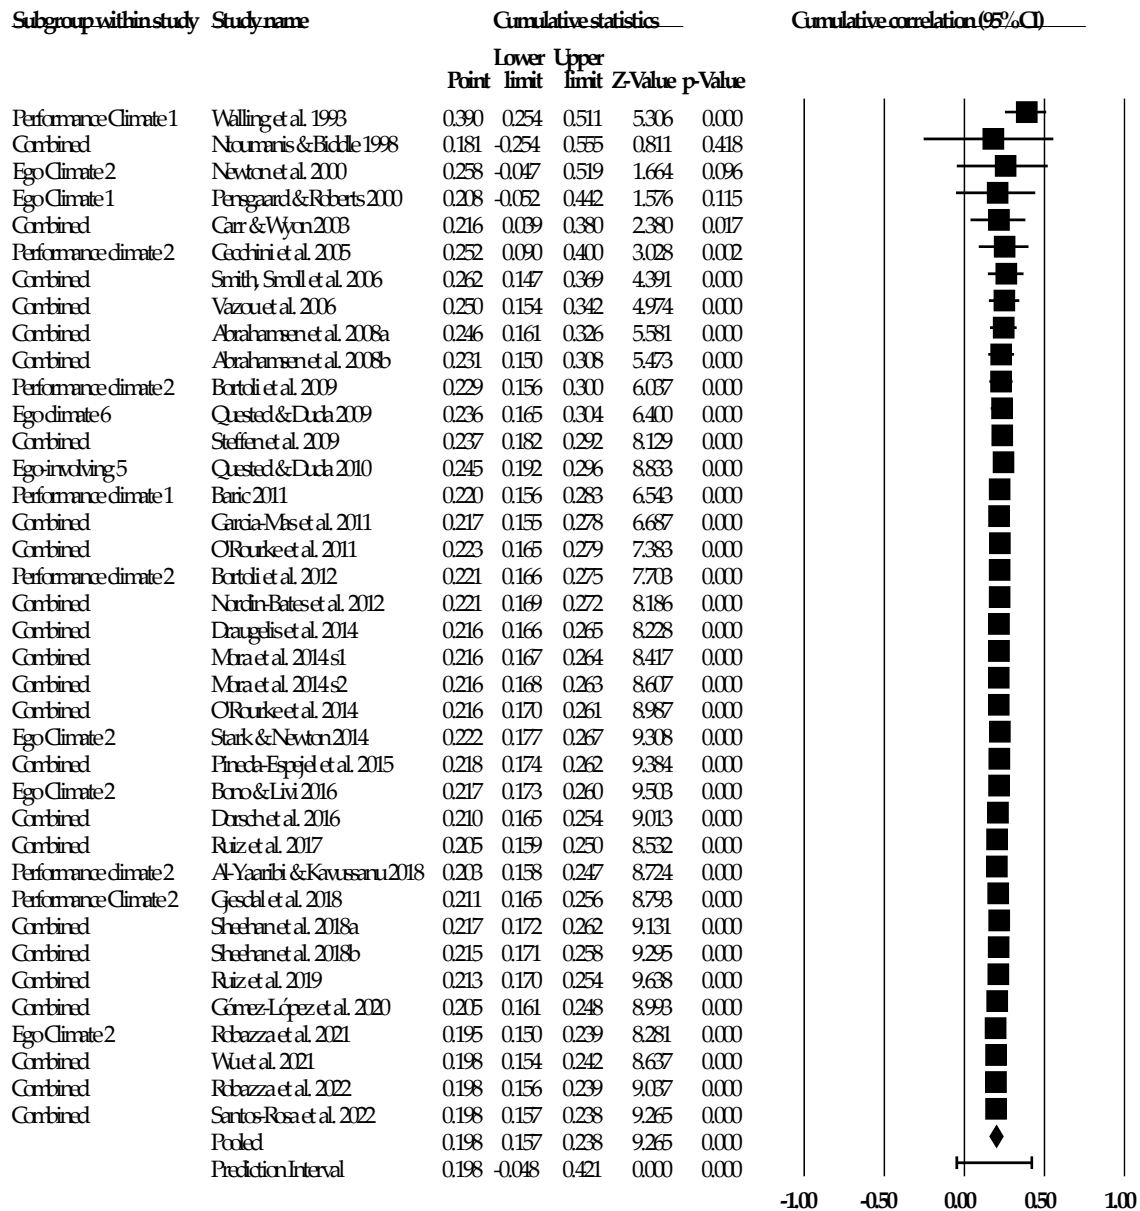

**Supp Figure 12.** Cumulative analysis by year for ego/performance climate and negative affect/mood.



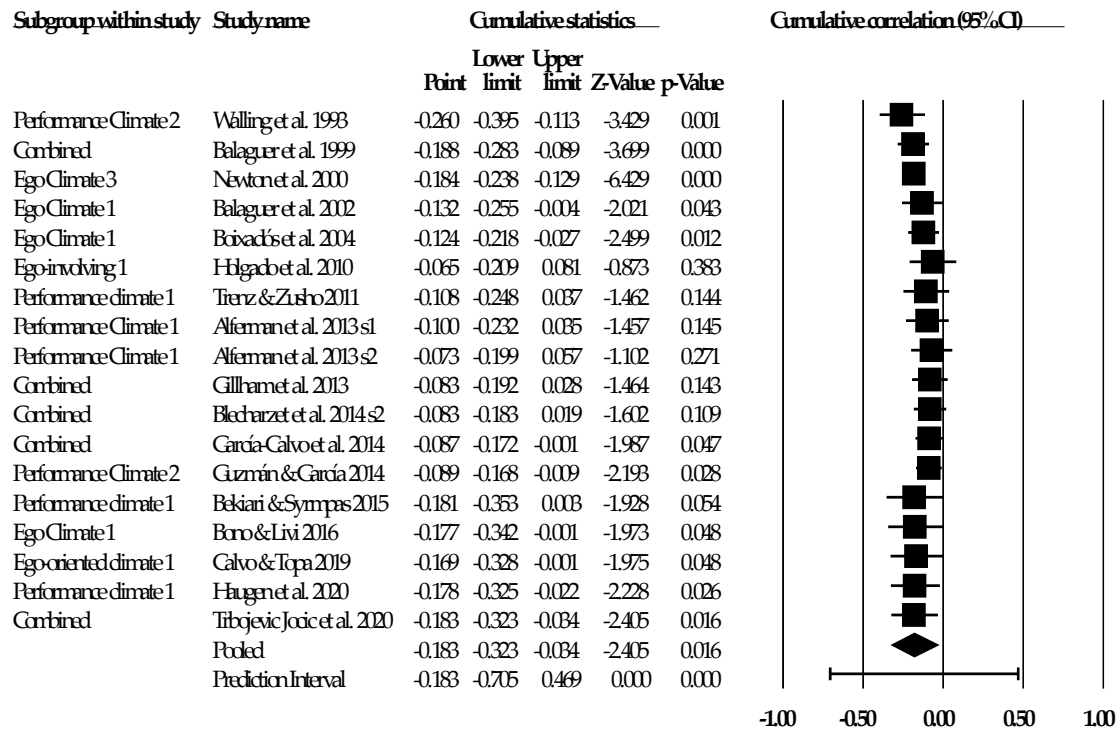

**Supp Figure 13.** Cumulative analysis by year for ego/performance climate and satisfaction.
